# Supplementary material
Source: publisher site journal article supplement (https://www.dovepress.com/article/347085)
Supplement: Supplementary file 1 [file get_supplementary_file.php]

# Supplementary information

## Supplementary appendix A

**Supplementary table A. Statin dose based on percentage reduction in LDL-C1**

| **Statin dose (mg)** | **Intensity (% reduction in LDL-C)** | | |
| --- | --- | --- | --- |
| **Low**  **(20-30%)** | **Medium**  **(31-40%)** | **High**  **(>40%)** |
| Fluvastatin | ≤80 | NA | NA |
| Pravastatin | ≤40 | NA | NA |
| Simvastatin | <20 | 20 ≤ dose <80 | 80 |
| Atorvastatin | <10 | 10 ≤ dose <20 | 20 |
| Rosuvastatin | <5 | 5 ≤ dose <10 | ≥10 |

**Abbreviations:** LDL-C, low-density lipoprotein cholesterol; NA, not applicable.

## Supplementary appendix B

### Codes

**Supplementary table B. Diagnosis codes2**

| **Classification** | **Subclassification** | **Coding library** | **ICD-10 code** | **MEDcode** | **Read code** | **Definition** |
| --- | --- | --- | --- | --- | --- | --- |
| CVD | Ischemic stroke | ICD-10 | I63 |  |  | Cerebral infarction |
| CVD | Ischemic stroke | ICD-10 | I65 |  |  | Occlusion and stenosis of precerebral arteries, not resulting in cerebral infarction |
| CVD | Ischemic stroke | ICD-10 | I66 |  |  | Occlusion and stenosis of cerebral arteries, not resulting in cerebral infarction |
| CVD | Ischemic stroke | ICD-10 | I69.3 |  |  | Sequelae of cerebral infarction |
| CVD | Ischemic stroke | ICD-10 | G46 |  |  | Vascular syndromes of brain in cerebrovascular diseases |
| CVD | Ischemic stroke | Read codes |  | 110337 | Gyu6C00 | [X]Sequelae of stroke,not specfd as h'morrhage or infarction |
| CVD | Ischemic stroke | Read codes |  | 31218 | 9Om..00 | Stroke/transient ischaemic attack monitoring administration |
| CVD | Ischemic stroke | Read codes |  | 34245 | 9Om1.00 | Stroke/transient ischaemic attack monitoring second letter |
| CVD | Ischemic stroke | Read codes |  | 51465 | 9Om3.00 | Stroke/transient ischaemic attack monitoring verbal invitati |
| CVD | Ischemic stroke | Read codes |  | 17322 | G664.00 | Cerebellar stroke syndrome |
| CVD | Ischemic stroke | Read codes |  | 6253 | G66..12 | Stroke unspecified |
| CVD | Ischemic stroke | Read codes |  | 42248 | ZLEP.00 | Discharge from stroke serv |
| CVD | Ischemic stroke | Read codes |  | 104505 | 662M200 | Stroke initial post discharge review |
| CVD | Ischemic stroke | Read codes |  | 18804 | 8HTQ.00 | Referral to stroke clinic |
| CVD | Ischemic stroke | Read codes |  | 10792 | 662M.00 | Stroke monitoring |
| CVD | Ischemic stroke | Read codes |  | 105520 | 8Hd6.00 | Admission to stroke unit |
| CVD | Ischemic stroke | Read codes |  | 104638 | 8IEC.00 | Ref multidisciplinary stroke function improvement declined |
| CVD | Ischemic stroke | Read codes |  | 8443 | G663.00 | Brain stem stroke syndrome |
| CVD | Ischemic stroke | Read codes |  | 55351 | 7P24200 | Delivery of rehabilitation for stroke |
| CVD | Ischemic stroke | Read codes |  | 52246 | 13YA.00 | Stroke group member |
| CVD | Ischemic stroke | Read codes |  | 6228 | G68X.00 | Sequelae of stroke;not specfd as h'morrhage or infarction |
| CVD | Ischemic stroke | Read codes |  | 107195 | 661M700 | Stroke self-management plan agreed |
| CVD | Ischemic stroke | Read codes |  | 103690 | 38G3.00 | Hyperten, abnorm renal/liver funct, stroke, BLED score |
| CVD | Ischemic stroke | Read codes |  | 32959 | 9N0p.00 | Seen in stroke clinic |
| CVD | Ischemic stroke | Read codes |  | 18604 | G61..12 | Stroke due to intracerebral haemorrhage |
| CVD | Ischemic stroke | Read codes |  | 6155 | G64..13 | Stroke due to cerebral arterial occlusion |
| CVD | Ischemic stroke | Read codes |  | 100639 | 1M4..00 | Central post-stroke pain |
| CVD | Ischemic stroke | Read codes |  | 89913 | 9Om4.00 | Stroke/transient ischaemic attack monitoring telephone invte |
| CVD | Ischemic stroke | Read codes |  | 107886 | 662e.11 | Stroke annual review |
| CVD | Ischemic stroke | Read codes |  | 28753 | 9Om0.00 | Stroke/transient ischaemic attack monitoring first letter |
| CVD | Ischemic stroke | Read codes |  | 34375 | 9Om2.00 | Stroke/transient ischaemic attack monitoring third letter |
| CVD | Ischemic stroke | Read codes |  | 13707 | 8HBJ.00 | Stroke / transient ischaemic attack referral |
| CVD | Ischemic stroke | Read codes |  | 56458 | 8HHM.00 | Ref to multidisciplinary stroke function improvement service |
| CVD | Ischemic stroke | Read codes |  | 1469 | G66..00 | Stroke and cerebrovascular accident unspecified |
| CVD | Ischemic stroke | Read codes |  | 109743 | 661N700 | Stroke self-management plan review |
| CVD | Ischemic stroke | Read codes |  | 24035 | E031400 | Subacute confusional state, of cerebrovascular origin |
| CVD | Ischemic stroke | Read codes |  | 34117 | G67y.00 | Other cerebrovascular disease OS |
| CVD | Ischemic stroke | Read codes |  | 99367 | Gyu6A00 | [X]Other cerebrovascular disorders in diseases CE |
| CVD | Ischemic stroke | Read codes |  | 13577 | G67..00 | Other cerebrovascular disease |
| CVD | Ischemic stroke | Read codes |  | 6116 | G66..13 | CVA - Cerebrovascular accident unspecified |
| CVD | Ischemic stroke | Read codes |  | 51311 | G6y..00 | Other specified cerebrovascular disease |
| CVD | Ischemic stroke | Read codes |  | 37493 | G67z.00 | Other cerebrovascular disease NOS |
| CVD | Ischemic stroke | Read codes |  | 51138 | G68W.00 | Sequelae/other + unspecified cerebrovascular diseases |
| CVD | Ischemic stroke | Read codes |  | 25114 | E030400 | Acute confusional state, of cerebrovascular origin |
| CVD | Ischemic stroke | Read codes |  | 40053 | G671.00 | Generalised ischaemic cerebrovascular disease NOS |
| CVD | Ischemic stroke | Read codes |  | 7138 | ZV12512 | [V]Personal history of cerebrovascular accident (CVA) |
| CVD | Ischemic stroke | Read codes |  | 60781 | P7y0z00 | Cerebrovascular system anomaly NOS |
| CVD | Ischemic stroke | Read codes |  | 70536 | G671000 | Acute cerebrovascular insufficiency NOS |
| CVD | Ischemic stroke | Read codes |  | 94105 | P7y0y00 | Other specified cerebrovascular anomaly |
| CVD | Ischemic stroke | Read codes |  | 31451 | P7y0.00 | Cerebrovascular system anomalies |
| CVD | Ischemic stroke | Read codes |  | 12555 | G671z00 | Generalised ischaemic cerebrovascular disease NOS |
| CVD | Ischemic stroke | Read codes |  | 54744 | F11x200 | Cerebral degeneration due to cerebrovascular disease |
| CVD | Ischemic stroke | Read codes |  | 95347 | Fyu5700 | [X]Other vascular syndroms/brain in cerebrovasculr diseases |
| CVD | Ischemic stroke | Read codes |  | 98188 | G679.00 | Small vessel cerebrovascular disease |
| CVD | Ischemic stroke | Read codes |  | 10062 | G6z..00 | Cerebrovascular disease NOS |
| CVD | Ischemic stroke | Read codes |  | 23361 | G68..00 | Late effects of cerebrovascular disease |
| CVD | Ischemic stroke | Read codes |  | 2418 | G6...00 | Cerebrovascular disease |
| CVD | MI | ICD-10 | I21 |  |  | Acute myocardial infarction |
| CVD | MI | ICD-10 | I22 |  |  | Subsequent myocardial infarction |
| CVD | MI | ICD-10 | I23 |  |  | Certain current complications follow acute myocardial infarction |
| CVD | MI | Read codes |  | 17689 | G30..17 | Silent myocardial infarction |
| CVD | MI | Read codes |  | 1677 | G30..15 | MI - acute myocardial infarction |
| CVD | MI | Read codes |  | 30421 | G30..13 | Cardiac rupture following myocardial infarction (MI) |
| CVD | MI | Read codes |  | 38609 | G351.00 | Subsequent myocardial infarction of inferior wall |
| CVD | MI | Read codes |  | 45809 | G350.00 | Subsequent myocardial infarction of anterior wall |
| CVD | MI | Read codes |  | 109035 | Gyu3500 | [X]Subsequent myocardial infarction of other sites |
| CVD | MI | Read codes |  | 23892 | G304.00 | Posterior myocardial infarction NOS |
| CVD | MI | Read codes |  | 100139 | 14AT.00 | History of myocardial infarction |
| CVD | MI | Read codes |  | 10562 | G307100 | Acute non-ST segment elevation myocardial infarction |
| CVD | MI | Read codes |  | 14897 | G301z00 | Anterior myocardial infarction NOS |
| CVD | MI | Read codes |  | 5387 | G301.00 | Other specified anterior myocardial infarction |
| CVD | MI | Read codes |  | 29758 | G30X.00 | Acute transmural myocardial infarction of unspecif site |
| CVD | MI | Read codes |  | 14898 | G305.00 | Lateral myocardial infarction NOS |
| CVD | MI | Read codes |  | 46112 | G380.00 | Postoperative transmural myocardial infarction anterior wall |
| CVD | MI | Read codes |  | 41835 | G384.00 | Postoperative subendocardial myocardial infarction |
| CVD | MI | Read codes |  | 61670 | 889A.00 | Diab mellit insulin-glucose infus acute myocardial infarct |
| CVD | MI | Read codes |  | 23579 | G310.00 | Postmyocardial infarction syndrome |
| CVD | MI | Read codes |  | 46017 | G30yz00 | Other acute myocardial infarction NOS |
| CVD | MI | Read codes |  | 14658 | G30z.00 | Acute myocardial infarction NOS |
| CVD | MI | Read codes |  | 63467 | G306.00 | True posterior myocardial infarction |
| CVD | MI | Read codes |  | 72562 | G353.00 | Subsequent myocardial infarction of other sites |
| CVD | MI | Read codes |  | 241 | G30..00 | Acute myocardial infarction |
| CVD | MI | Read codes |  | 46276 | G381.00 | Postoperative transmural myocardial infarction inferior wall |
| CVD | MI | Read codes |  | 106812 | G383.00 | Postoperative transmural myocardial infarction unspec site |
| CVD | MI | Read codes |  | 32272 | G38..00 | Postoperative myocardial infarction |
| CVD | MI | Read codes |  | 36423 | G36..00 | Certain current complication follow acute myocardial infarct |
| CVD | MI | Read codes |  | 18842 | G35..00 | Subsequent myocardial infarction |
| CVD | MI | Read codes |  | 34803 | G30y.00 | Other acute myocardial infarction |
| CVD | MI | Read codes |  | 59032 | 323Z.00 | ECG: myocardial infarct NOS |
| CVD | MI | Read codes |  | 96838 | Gyu3400 | [X]Acute transmural myocardial infarction of unspecif site |
| CVD | MI | Read codes |  | 7783 | 323..00 | ECG: myocardial infarction |
| CVD | MI | Read codes |  | 1678 | G308.00 | Inferior myocardial infarction NOS |
| CVD | MI | Read codes |  | 32854 | G30B.00 | Acute posterolateral myocardial infarction |
| CVD | MI | Read codes |  | 46166 | G35X.00 | Subsequent myocardial infarction of unspecified site |
| CVD | MI | Read codes |  | 68748 | G38z.00 | Postoperative myocardial infarction, unspecified |
| CVD | MI | Read codes |  | 12229 | G30X000 | Acute ST segment elevation myocardial infarction |
| CVD | MI | Read codes |  | 99991 | Gyu3600 | [X]Subsequent myocardial infarction of unspecified site |
| CVD | MI | Read codes |  | 7137 | 7920y00 | Saphenous vein graft replacement of coronary artery OS |
| CVD | MI | Read codes |  | 33735 | 7928100 | Percut translum balloon angioplasty mult coronary arteries |
| CVD | MI | Read codes |  | 101569 | 7924300 | Revision of bypass for four or more coronary arteries |
| CVD | MI | Read codes |  | 55092 | 792C000 | Replacement of coronary arteries using multiple methods |
| CVD | MI | Read codes |  | 70111 | 7922000 | Allograft replacement of one coronary artery |
| CVD | MI | Read codes |  | 70755 | 792Cz00 | Replacement of coronary artery NOS |
| CVD | MI | Read codes |  | 28837 | 7925.11 | Creation of bypass from mammary artery to coronary artery |
| CVD | MI | Read codes |  | 66664 | 7923100 | Prosthetic replacement of two coronary arteries |
| CVD | MI | Read codes |  | 5904 | 792..00 | Coronary artery operations |
| CVD | MI | Read codes |  | 56990 | 7925z00 | Connection of mammary artery to coronary artery NOS |
| CVD | MI | Read codes |  | 41757 | 7927z00 | Other open operation on coronary artery NOS |
| CVD | MI | Read codes |  | 42708 | 7921300 | Autograft replacement of four of more coronary arteries NEC |
| CVD | MI | Read codes |  | 61208 | 793Gz00 | Perc translum balloon angioplasty stenting coronary art NOS |
| CVD | MI | Read codes |  | 9414 | 7921 | Other autograft replacement of coronary artery |
| CVD | MI | Read codes |  | 70160 | 9Ob9.00 | Coronary heart disease monitoring telephone invite |
| CVD | MI | Read codes |  | 25814 | 9Ob3.00 | Coronary heart disease monitoring 1st letter |
| CVD | MI | Read codes |  | 2901 | 7928 | Transluminal balloon angioplasty of coronary artery |
| CVD | MI | Read codes |  | 33461 | 7924 | Revision of bypass for coronary artery |
| CVD | MI | Read codes |  | 70518 | U60C318 | [X] Adverse reaction to coronary vasodilators NOS |
| CVD | MI | Read codes |  | 96532 | U60C311 | [X] Adverse reaction to coronary vasodilator |
| CVD | MI | Read codes |  | 34207 | 9Ob4.00 | Coronary heart disease monitoring 2nd letter |
| CVD | MI | Read codes |  | 37908 | 9Ob6.00 | Coronary heart disease monitoring verbal invitation |
| CVD | MI | Read codes |  | 22828 | 7929000 | Percutaneous transluminal laser coronary angioplasty |
| CVD | MI | Read codes |  | 34963 | 792D.00 | Other bypass of coronary artery |
| CVD | MI | Read codes |  | 8312 | 7920.11 | Saphenous vein graft bypass of coronary artery |
| CVD | MI | Read codes |  | 36196 | 7938600 | Coronary arteriography using three catheters |
| CVD | MI | Read codes |  | 33620 | 792B.00 | Repair of coronary artery NEC |
| CVD | MI | Read codes |  | 105479 | G39..00 | Coronary microvascular disease |
| CVD | MI | Read codes |  | 31373 | P6y4400 | Anomalous coronary artery communication |
| CVD | MI | Read codes |  | 52615 | P6y7.00 | Myocardial bridge of coronary artery |
| CVD | MI | Read codes |  | 95382 | 7927y00 | Other specified other open operation on coronary artery |
| CVD | MI | Read codes |  | 10209 | 7921200 | Autograft replacement of three coronary arteries NEC |
| CVD | MI | Read codes |  | 52938 | 7924000 | Revision of bypass for one coronary artery |
| CVD | MI | Read codes |  | 10260 | 6A4..00 | Coronary heart disease review |
| CVD | MI | Read codes |  | 48206 | 7927300 | Transposition of coronary artery NEC |
| CVD | MI | Read codes |  | 57634 | 7924z00 | Revision of bypass for coronary artery NOS |
| CVD | MI | Read codes |  | 5030 | ZV45K00 | [V]Presence of coronary artery bypass graft |
| CVD | MI | Read codes |  | 93828 | 792Cy00 | Other specified replacement of coronary artery |
| CVD | MI | Read codes |  | 100496 | 8CEJ.00 | Coronary heart disease leaflet given |
| CVD | MI | Read codes |  | 47798 | 9Ob2.00 | Coronary heart disease monitoring default |
| CVD | MI | Read codes |  | 35373 | 9Ob0.00 | Attends coronary heart disease monitoring |
| CVD | MI | Read codes |  | 93618 | 7929600 | Percutaneous transluminal atherectomy of coronary artery |
| CVD | MI | Read codes |  | 3999 | G340000 | Single coronary vessel disease |
| CVD | MI | Read codes |  | 24888 | 7929 | Other therapeutic transluminal operations on coronary artery |
| CVD | MI | Read codes |  | 10603 | 792z.00 | Coronary artery operations NOS |
| CVD | MI | Read codes |  | 103894 | P6y4300 | Coronary artery from pulmonary trunk |
| CVD | MI | Read codes |  | 45370 | 7922300 | Allograft replacement of four or more coronary arteries |
| CVD | MI | Read codes |  | 71748 | 8CR6.00 | Coronary heart disease risk clinical management plan |
| CVD | MI | Read codes |  | 96804 | 7926 | Connection of other thoracic artery to coronary artery |
| CVD | MI | Read codes |  | 59423 | 7922y00 | Other specified allograft replacement of coronary artery |
| CVD | MI | Read codes |  | 7134 | 7921.11 | Other autograft bypass of coronary artery |
| CVD | MI | Read codes |  | 67554 | 7924100 | Revision of bypass for two coronary arteries |
| CVD | MI | Read codes |  | 18135 | 6A2..00 | Coronary heart disease annual review |
| CVD | MI | Read codes |  | 732 | 7928z00 | Transluminal balloon angioplasty of coronary artery NOS |
| CVD | MI | Read codes |  | 47788 | 7927 | Other open operations on coronary artery |
| CVD | MI | Read codes |  | 92419 | 7923000 | Prosthetic replacement of one coronary artery |
| CVD | MI | Read codes |  | 18150 | 9Ob..00 | Coronary heart disease monitoring administration |
| CVD | MI | Read codes |  | 5254 | G340100 | Double coronary vessel disease |
| CVD | MI | Read codes |  | 107406 | 7.92E+02 | Emergency percutaneous coronary intervention |
| CVD | MI | Read codes |  | 19402 | 7923 | Prosthetic replacement of coronary artery |
| CVD | MI | Read codes |  | 31519 | 7925100 | Double implant of mammary arteries into coronary arteries |
| CVD | MI | Read codes |  | 30892 | 554Z.00 | Coronary arteriog-general NOS |
| CVD | MI | Read codes |  | 32651 | 7922.11 | Allograft bypass of coronary artery |
| CVD | MI | Read codes |  | 66583 | 7929200 | Percut translum inject therap subst to coronary artery NEC |
| CVD | MI | Read codes |  | 103932 | 8CMP.00 | Coronary heart disease care plan |
| CVD | MI | Read codes |  | 7442 | 7920200 | Saphenous vein graft replacement of three coronary arteries |
| CVD | MI | Read codes |  | 26206 | 7938400 | Coronary arteriography using single catheter |
| CVD | MI | Read codes |  | 45886 | 7922200 | Allograft replacement of three coronary arteries |
| CVD | MI | Read codes |  | 11610 | 7920300 | Saphenous vein graft replacement of four+ coronary arteries |
| CVD | MI | Read codes |  | 48767 | 7922z00 | Allograft replacement of coronary artery NOS |
| CVD | MI | Read codes |  | 61310 | 7921y00 | Other autograft replacement of coronary artery OS |
| CVD | MI | Read codes |  | 3159 | 792Dy00 | Other specified other bypass of coronary artery |
| CVD | MI | Read codes |  | 5703 | 7928.11 | Percutaneous balloon coronary angioplasty |
| CVD | MI | Read codes |  | 18249 | 7920 | Saphenous vein graft replacement of coronary artery |
| CVD | MI | Read codes |  | 66236 | 7923200 | Prosthetic replacement of three coronary arteries |
| CVD | MI | Read codes |  | 18643 | ZV45800 | [V]Presence of coronary angioplasty implant and graft |
| CVD | MI | Read codes |  | 72780 | 7926z00 | Connection of other thoracic artery to coronary artery NOS |
| CVD | MI | Read codes |  | 51515 | 7920z00 | Saphenous vein graft replacement coronary artery NOS |
| CVD | MI | Read codes |  | 8679 | 7920000 | Saphenous vein graft replacement of one coronary artery |
| CVD | MI | Read codes |  | 12734 | SP07600 | Coronary artery bypass graft occlusion |
| CVD | MI | Read codes |  | 36011 | 7923.11 | Prosthetic bypass of coronary artery |
| CVD | MI | Read codes |  | 33718 | 7925000 | Double anastomosis of mammary arteries to coronary arteries |
| CVD | MI | Read codes |  | 67591 | 7926200 | Single anastomosis of thoracic artery to coronary artery NEC |
| CVD | MI | Read codes |  | 42304 | 7929500 | Insertion of drug-eluting coronary artery stent |
| CVD | MI | Read codes |  | 19465 | 7938300 | Coronary arteriography using two catheters |
| CVD | MI | Read codes |  | 31556 | 7922 | Allograft replacement of coronary artery |
| CVD | MI | Read codes |  | 11648 | 8B3k.00 | Coronary heart disease medication review |
| CVD | MI | Read codes |  | 31679 | 7929z00 | Other therapeutic transluminal op on coronary artery NOS |
| CVD | MI | Read codes |  | 51507 | 7925300 | Single anastomosis of mammary artery to coronary artery NEC |
| CVD | MI | Read codes |  | 22020 | 792B000 | Endarterectomy of coronary artery NEC |
| CVD | MI | Read codes |  | 43939 | 793G.00 | Perc translumin balloon angioplasty stenting coronary artery |
| CVD | MI | Read codes |  | 44585 | 792Bz00 | Repair of coronary artery NOS |
| CVD | MI | Read codes |  | 19413 | 7921100 | Autograft replacement of two coronary arteries NEC |
| CVD | MI | Read codes |  | 24540 | G34y000 | Chronic coronary insufficiency |
| CVD | MI | Read codes |  | 101373 | 8L41.00 | Coronary angioplasty planned |
| CVD | MI | Read codes |  | 5674 | ZV45K11 | [V]Presence of coronary artery bypass graft - CABG |
| CVD | MI | Read codes |  | 7634 | 7920100 | Saphenous vein graft replacement of two coronary arteries |
| CVD | MI | Read codes |  | 86071 | 7928300 | Percut translum cutting balloon angioplasty coronary artery |
| CVD | MI | Read codes |  | 9276 | G31y000 | Acute coronary insufficiency |
| CVD | MI | Read codes |  | 60753 | 7926300 | Single implantation thoracic artery into coronary artery NEC |
| CVD | MI | Read codes |  | 41547 | 7928y00 | Transluminal balloon angioplasty of coronary artery OS |
| CVD | MI | Read codes |  | 8942 | 7929400 | Insertion of coronary artery stent |
| CVD | MI | Read codes |  | 37719 | 7925y00 | Connection of mammary artery to coronary artery OS |
| CVD | MI | Read codes |  | 18889 | G34z000 | Asymptomatic coronary heart disease |
| CVD | MI | Read codes |  | 67761 | 7923300 | Prosthetic replacement of four or more coronary arteries |
| CVD | MI | Read codes |  | 40996 | 7929111 | Percut translum coronary thrombolytic therapy- streptokinase |
| CVD | MI | Read codes |  | 44723 | 7925200 | Single anast mammary art to left ant descend coronary art |
| CVD | MI | Read codes |  | 94783 | 792B100 | Repair of rupture of coronary artery |
| CVD | MI | Read codes |  | 56741 | 7905100 | Correct total anomal pulm venous connect to coronary sinus |
| CVD | MI | Read codes |  | 69247 | 792By00 | Other specified repair of coronary artery |
| CVD | MI | Read codes |  | 103586 | 5544 | Computed tomography angiography of coronary arteries |
| CVD | MI | Read codes |  | 737 | 792..11 | Coronary artery bypass graft operations |
| CVD | MI | Read codes |  | 59193 | G341200 | Aneurysm of coronary vessels |
| CVD | MI | Read codes |  | 101121 | 8L40.00 | Coronary artery bypass graft operation planned |
| CVD | MI | Read codes |  | 1344 | G340.12 | Coronary artery disease |
| CVD | MI | Read codes |  | 97953 | 7924y00 | Other specified revision of bypass for coronary artery |
| CVD | MI | Read codes |  | 31540 | 7924200 | Revision of bypass for three coronary arteries |
| CVD | MI | Read codes |  | 18670 | 7928000 | Percut transluminal balloon angioplasty one coronary artery |
| CVD | MI | Read codes |  | 105184 | 792E.00 | Percutaneous coronary intervention |
| CVD | MI | Read codes |  | 13571 | G30..16 | Thrombosis - coronary |
| CVD | MI | Read codes |  | 2491 | G30..12 | Coronary thrombosis |
| CVD | MI | Read codes |  | 67799 | U60C300 | [X]Coronary vasodilat caus advers effect in therap use, NEC |
| CVD | MI | Read codes |  | 7609 | 7921z00 | Other autograft replacement of coronary artery NOS |
| CVD | MI | Read codes |  | 19193 | 7923z00 | Prosthetic replacement of coronary artery NOS |
| CVD | MI | Read codes |  | 53546 | P6y4z00 | Coronary artery anomaly NOS |
| CVD | MI | Read codes |  | 39500 | 9Ob8.00 | Coronary heart disease monitoring check done |
| CVD | MI | Read codes |  | 11983 | G311500 | Acute coronary syndrome |
| CVD | MI | Read codes |  | 44561 | 7921000 | Autograft replacement of one coronary artery NEC |
| CVD | MI | Read codes |  | 5744 | 7927500 | Open angioplasty of coronary artery |
| CVD | MI | Read codes |  | 68139 | 7925400 | Single implantation of mammary artery into coronary artery |
| CVD | MI | Read codes |  | 33471 | 792Dz00 | Other bypass of coronary artery NOS |
| CVD | MI | Read codes |  | 34965 | 792A.00 | Diagnostic transluminal operations on coronary artery |
| CVD | MI | Read codes |  | 33650 | 7929100 | Percut transluminal coronary thrombolysis with streptokinase |
| CVD | MI | Read codes |  | 55598 | 792C.00 | Other replacement of coronary artery |
| CVD | MI | Read codes |  | 69776 | SP00300 | Mechanical complication of coronary bypass |
| CVD | MI | Read codes |  | 57241 | 7922100 | Allograft replacement of two coronary arteries |
| CVD | PAD | Read codes | I70 |  |  | Atherosclerosis |
| CVD | PAD | Read codes | I73 |  |  | Other peripheral vascular diseases |
| CVD | PAD | Read codes | I74 |  |  | Arterial embolism and thrombosis |
| CVD | PAD | Read codes |  | 5184 | G670.11 | Precerebral atherosclerosis |
| CVD | PAD | Read codes |  | 11171 | G670.00 | Cerebral atherosclerosis |
| CVD | PAD | Read codes |  | 16284 | G701.00 | Renal artery atherosclerosis |
| CVD | PAD | Read codes |  | 37199 | G70y000 | Carotid artery atherosclerosis |
| CVD | PAD | Read codes |  | 1318 | G700.00 | Aortic atherosclerosis |
| CVD | PAD | Read codes |  | 100579 | Gyu7000 | [X]Atherosclerosis of other arteries |
| CVD | PAD | Read codes |  | 5640 | G70..00 | Atherosclerosis |
| CVD | PAD | Read codes |  | 56621 | G5y2.00 | Cardiovascular arteriosclerosis unspecified |
| CVD | PAD | Read codes |  | 996 | G70..11 | Arteriosclerosis |
| CVD | PAD | Read codes |  | 105317 | G734.00 | Peripheral arterial disease |
| CVD | PAD | Read codes |  | 15302 | G742z00 | Peripheral arterial embolism and thrombosis NOS |
| CVD | PAD | Read codes |  | 5595 | G730100 | Raynaud's phenomenon |
| CVD | PAD | Read codes |  | 1002 | G730000 | Raynaud's disease |
| CVD | PAD | Read codes |  | 1231 | G730.00 | Raynaud's syndrome |
| CVD | PAD | Read codes |  | 39097 | G730z00 | Raynaud's syndrome NOS |
| CVD | PAD | Read codes |  | 32634 | G74y100 | Embolism and/or thrombosis of the internal iliac artery |
| CVD | PAD | Read codes |  | 4539 | G742500 | Embolism and thrombosis of the popliteal artery |
| CVD | PAD | Read codes |  | 45645 | G741.00 | Embolism and thrombosis of the thoracic aorta |
| CVD | PAD | Read codes |  | 29372 | G742100 | Embolism and thrombosis of the radial artery |
| CVD | PAD | Read codes |  | 51194 | K138200 | Renal artery thrombosis |
| CVD | PAD | Read codes |  | 23765 | G82z111 | Penis vein thrombosis |
| CVD | PAD | Read codes |  | 32235 | G74y.00 | Embolism and thrombosis of other specified artery |
| CVD | PAD | Read codes |  | 69232 | G742600 | Embolism and thrombosis of the anterior tibial artery |
| CVD | PAD | Read codes |  | 9364 | G74..12 | Thrombosis - arterial |
| CVD | PAD | Read codes |  | 8998 | G74..11 | Arterial embolus and thrombosis |
| CVD | PAD | Read codes |  | 71860 | G742700 | Embolism and thrombosis of the dorsalis pedis artery |
| CVD | PAD | Read codes |  | 15253 | G740.00 | Embolism and thrombosis of the abdominal aorta |
| CVD | PAD | Read codes |  | 54485 | K286500 | Testicular thrombosis |
| CVD | PAD | Read codes |  | 99532 | G742800 | Embolism and thrombosis of the posterior tibial artery |
| CVD | PAD | Read codes |  | 109425 | Gyu7500 | [X]Embolism and thrombosis of other arteries |
| CVD | PAD | Read codes |  | 4289 | G74..00 | Arterial embolism and thrombosis |
| CVD | PAD | Read codes |  | 34159 | G742000 | Embolism and thrombosis of the brachial artery |
| CVD | PAD | Read codes |  | 33535 | F161500 | Anterior spinal artery thrombosis |
| CVD | PAD | Read codes |  | 4152 | G631.12 | Thrombosis, carotid artery |
| CVD | PAD | Read codes |  | 3714 | G74z.00 | Arterial embolism and thrombosis NOS |
| CVD | PAD | Read codes |  | 6900 | G74y500 | Embolism and thrombosis of the subclavian artery |
| CVD | PAD | Read codes |  | 41597 | G74yz00 | Embolism and thrombosis of other arteries NOS |
| CVD | PAD | Read codes |  | 56919 | G74y200 | Embolism and/or thrombosis of the external iliac artery |
| CVD | PAD | Read codes |  | 44835 | G742900 | Embolism and thrombosis of a leg artery NOS |
| CVD | PAD | Read codes |  | 35181 | K286200 | Scrotal thrombosis |
| CVD | PAD | Read codes |  | 44085 | G742.00 | Embolism and thrombosis of an arm or leg artery |
| CVD | PAD | Read codes |  | 36673 | J420.18 | Mesenteric thrombosis |
| CVD | PAD | Read codes |  | 33722 | K286x00 | Male genital thrombosis NOS |
| CVD | PAD | Read codes |  | 27494 | G74y300 | Embolism and thrombosis of the iliac artery unspecified |
| CVD | PAD | Read codes |  | 54865 | G74y000 | Embolism and/or thrombosis of the common iliac artery |
| CVD | PAD | Read codes |  | 49490 | G74y900 | Embolism and thrombosis of the hepatic artery |
| CVD | PAD | Read codes |  | 62368 | G742200 | Embolism and thrombosis of the ulnar artery |
| CVD | PAD | Read codes |  | 31460 | G74y700 | Embolism and thrombosis of the axillary artery |
| CVD | PAD | Read codes |  | 47665 | G74y800 | Embolism and thrombosis of the coeliac artery |
| CVD | PAD | Read codes |  | 30495 | G742300 | Embolism and thrombosis of an arm artery NOS |
| CVD | PAD | Read codes |  | 66981 | G74y600 | Embolism and thrombosis of the splenic artery |
| CVD | PAD | Read codes |  | 2065 | G742400 | Embolism and thrombosis of the femoral artery |
| CVD | PAD | Read codes |  | 7720 | F423100 | Central retinal artery occlusion |
| CVD | PAD | Read codes |  | 8149 | F423211 | Branch retinal artery occlusion |
| CVD | PAD | Read codes |  | 53818 | FyuF500 | [X]Other retinal artery occlusions |
| CVD | PAD | Read codes |  | 8610 | G76z000 | Iliac artery occlusion |
| CVD | PAD | Read codes |  | 105385 | G78..00 | Occlusion of artery |
| CVD | PAD | Read codes |  | 7694 | G76z100 | Femoral artery occlusion |
| CVD | PAD | Read codes |  | 93740 | 793K000 | Translum occlusion left internal mammary artery side branch |
| CVD | PAD | Read codes |  | 110194 | 7A0C000 | Major systemic to pulmonary collateral artery occlusion |
| CVD | PAD | Read codes |  | 4240 | G631.00 | Carotid artery occlusion |
| CVD | PAD | Read codes |  | 71585 | G63z.00 | Precerebral artery occlusion NOS |
| CVD | PAD | Read codes |  | 40847 | G632.00 | Vertebral artery occlusion |
| CVD | PAD | Read codes |  | 105773 | G784200 | Occlusion of posterior tibial artery |
| CVD | PAD | Read codes |  | 105894 | G783.00 | Occlusion of artery of upper limb |
| CVD | PAD | Read codes |  | 95430 | 7A56200 | Percutaneous transluminal occlusion of artery |
| CVD | PAD | Read codes |  | 9554 | G76z200 | Popliteal artery occlusion |
| CVD | PAD | Read codes |  | 105719 | G783100 | Occlusion of brachial artery |
| CVD | PAD | Read codes |  | 108721 | G784000 | Occlusion of dorsalis pedis artery |
| CVD | PAD | Read codes |  | 106090 | G783200 | Occlusion of ulnar artery |
| CVD | PAD | Read codes |  | 106020 | G784.00 | Occlusion of artery of lower limb |
| CVD | PAD | Read codes |  | 108267 | G784100 | Occlusion of anterior tibial artery |
| CVD | PAD | Read codes |  | 106040 | G783000 | Occlusion of radial artery |
| CVD | PAD | Read codes |  | 1517 | G73z000 | Intermittent claudication |
| CVD | PAD | Read codes |  | 6853 | G73z011 | Claudication |
| CVD | PAD | Read codes |  | 101866 | G73z012 | Vascular claudication |
| CVD | Stable angina | Read codes | I20.8 |  |  | Stable angina |
| CVD | Stable angina | Read codes | I20.9 |  |  | Angina NOS |
| CVD | Stable angina | Read codes |  | 12804 | G33z700 | Stable angina |
| CVD | Stable angina | Read codes |  | 19542 | 662K000 | Angina control - good |
| CVD | Stable angina | Read codes |  | 28554 | G33zz00 | Angina pectoris NOS |
| CVD | Stable angina | Read codes |  | 1430 | G33..00 | Angina pectoris |
| CVD | Stable angina | Read codes |  | 15349 | 662Kz00 | Angina control NOS |
| CVD | Stable angina | Read codes |  | 25842 | G33z.00 | Angina pectoris NOS |
| CVD | Stable angina | Read codes |  | 1414 | G33z300 | Angina on effort |
| CVD | Stable angina | Read codes |  | 45960 | 8B27.00 | Antianginal therapy |
| CVD | Stable angina | Read codes |  | 14782 | 662K200 | Angina control - improving |
| CVD | Stable angina | Read codes |  | 11048 | G331.11 | Variant angina pectoris |
| CVD | TIA | ICD-10 | G45 |  |  | Transient cerebral ischaemic attacks and related syndromes |
| CVD | TIA | Read codes |  | 102326 | 1JK..00 | Suspected transient ischaemic attack |
| CVD | TIA | Read codes |  | 1433 | G65..12 | Transient ischaemic attack |
| CVD | TIA | Read codes |  | 105738 | G657.00 | Carotid territory transient ischaemic attack |
| CVD | TIA | Read codes |  | 18997 | 12C7.00 | Family history of transient ischaemic attack |
| CVD | TIA | Read codes |  | 101251 | ZV12D00 | [V]Personal history of transient ischaemic attack |
| CVD | TIA | Read codes |  | 100015 | 8CRB.00 | Transient ischaemic attack clinical management plan |
| CVD | TIA | Read codes |  | 42720 | F580200 | Transient ischaemic deafness |
| CVD | Unstable angina | ICD-10 | I20.0 |  |  | Unstable angina |
| CVD | Unstable angina | Read codes |  | 1431 | G311.13 | Unstable angina |
| CVD | Unstable angina | Read codes |  | 7347 | G311100 | Unstable angina |
| CVD | Unstable angina | Read codes |  | 7347 | G311100 | Unstable angina |
| CVD | Unstable angina | Read codes |  | 18118 | G311400 | Worsening angina |
| CVD | Unstable angina | Read codes |  | 18125 | G330000 | Nocturnal angina |
| CVD | Unstable angina | Read codes |  | 34328 | G311300 | Refractory angina |
| CVD | Unstable angina | Read codes |  | 29300 | 662K300 | Angina control - worsening |
| CVD | Unstable angina | Read codes |  | 19655 | G311.14 | Angina at rest |
| CVD | Unstable angina | Read codes |  | 17307 | G311200 | Angina at rest |
| CVD | Unstable angina | Read codes |  | 15373 | 662K100 | Angina control - poor |
| CVD | Unstable angina | Read codes |  | 26863 | G33z600 | New onset angina |
| CVD | Unstable angina | Read codes |  | 9555 | G33z500 | Post infarct angina |
| CVD |  | ICD-10 | I24 |  |  | Other acute ischaemic heart diseases |
| CVD |  | ICD-10 | I25 |  |  | Chronic ischaemic heart disease |
| CKD | Moderate | Read codes |  | 95177 | 1Z1G.00 | Chronic kidney disease stage 3B without proteinuria |
| CKD | Moderate | Read codes |  | 95179 | 1Z16.00 | Chronic kidney disease stage 3B |
| CKD | Moderate | Read codes |  | 94965 | 1Z15.00 | Chronic kidney disease stage 3A |
| CKD | Moderate | Read codes |  | 95408 | 1Z1D.00 | Chronic kidney disease stage 3A with proteinuria |
| CKD | Moderate | Read codes |  | 95178 | 1Z1F.00 | Chronic kidney disease stage 3B with proteinuria |
| CKD | Moderate | Read codes |  | 95175 | 1Z1E.00 | Chronic kidney disease stage 3A without proteinuria |
| CKD | Moderate | Read codes |  | 104619 | K053.00 | Chronic kidney disease stage 3 |
| CKD | Moderate | Read codes |  | 12566 | 1Z12.00 | Chronic kidney disease stage 3 |
| CKD | Moderate | Read codes |  | 94793 | 1Z1B.00 | Chronic kidney disease stage 3 with proteinuria |
| CKD | Moderate | Read codes |  | 95123 | 1Z1C.00 | Chronic kidney disease stage 3 without proteinuria |
| CKD | Severe | ICD-10 | N19 |  |  | Unspecified kidney failure |
| CKD | Severe | Read codes |  | 95406 | 1Z1J.00 | Chronic kidney disease stage 4 without proteinuria |
| CKD | Severe | Read codes |  | 95508 | 1Z1K.00 | Chronic kidney disease stage 5 with proteinuria |
| CKD | Severe | Read codes |  | 95122 | 1Z1H.00 | Chronic kidney disease stage 4 with proteinuria |
| CKD | Severe | Read codes |  | 95405 | 1Z1L.00 | Chronic kidney disease stage 5 without proteinuria |
| CKD | Severe | Read codes |  | 12479 | 1Z13.00 | Chronic kidney disease stage 4 |
| CKD | Severe | Read codes |  | 105151 | K055.00 | Chronic kidney disease stage 5 |
| CKD | Severe | Read codes |  | 12585 | 1Z14.00 | Chronic kidney disease stage 5 |
| CKD | Severe | Read codes |  | 104963 | K054.00 | Chronic kidney disease stage 4 |
| CKD | Severe | Read codes |  | 100205 | K0E..00 | Acute-on-chronic renal failure |
| CKD | Severe | Read codes |  | 25394 | D215000 | Anaemia secondary to chronic renal failure |
| CKD | Severe | Read codes |  | 512 | K05..00 | Chronic renal failure |
| CKD | Severe | Read codes |  | 39598 | SP15411 | Kidney failure as a complication of care |
| CKD | Severe | Read codes |  | 11553 | SP08300 | Kidney transplant failure and rejection |
| CKD | Severe | Read codes |  | 107771 | K06..12 | Kidney failure unspecified |
| CKD | Severe | Read codes |  | 28684 | G233.00 | Hypertensive heart and renal disease with renal failure |
| CKD | Severe | Read codes |  | 32423 | G222.00 | Hypertensive renal disease with renal failure |
| CKD | Severe | Read codes |  | 53852 | K05..12 | End stage renal failure |
| CKD | Severe | Read codes |  | 6712 | K050.00 | End stage renal failure |
| CKD |  | ICD-10 | N18 |  |  | Chronic kidney disease |
| CKD |  | ICD-10 | I12 |  |  | Hypertensive renal disease |
| CKD |  | Read codes |  | 104981 | K05..13 | Chronic kidney disease |
| CKD |  | Read codes |  | 72962 | 9Ot1.00 | Chronic kidney disease monitoring second letter |
| CKD |  | Read codes |  | 69679 | 9Ot4.00 | Chronic kidney disease monitoring telephone invite |
| CKD |  | Read codes |  | 112411 | 661N200 | Chronic kidney disease self-management plan review |
| CKD |  | Read codes |  | 88494 | 9Ot3.00 | Chronic kidney disease monitoring verbal invite |
| CKD |  | Read codes |  | 95146 | 1Z19.00 | Chronic kidney disease stage 2 with proteinuria |
| CKD |  | Read codes |  | 12586 | 1Z11.00 | Chronic kidney disease stage 2 |
| CKD |  | Read codes |  | 72964 | 9Ot2.00 | Chronic kidney disease monitoring third letter |
| CKD |  | Read codes |  | 30739 | 9Ot0.00 | Chronic kidney disease monitoring first letter |
| CKD |  | Read codes |  | 94789 | 1Z17.00 | Chronic kidney disease stage 1 with proteinuria |
| CKD |  | Read codes |  | 95121 | 1Z1A.00 | Chronic kidney disease stage 2 without proteinuria |
| CKD |  | Read codes |  | 30735 | 6AA..00 | Chronic kidney disease annual review |
| CKD |  | Read codes |  | 105392 | K051.00 | Chronic kidney disease stage 1 |
| CKD |  | Read codes |  | 29013 | 1Z10.00 | Chronic kidney disease stage 1 |
| CKD |  | Read codes |  | 108766 | 661M200 | Chronic kidney disease self-management plan agreed |
| CKD |  | Read codes |  | 19473 | 66i..00 | Chronic kidney disease monitoring |
| CKD |  | Read codes |  | 71271 | 9Ot..00 | Chronic kidney disease monitoring administration |
| CKD |  | Read codes |  | 105383 | K052.00 | Chronic kidney disease stage 2 |
| CKD |  | Read codes |  | 95572 | 1Z18.00 | Chronic kidney disease stage 1 without proteinuria |
| CKD |  | Read codes |  | 106620 | SP08J00 | Chronic rejection of renal transplant |
| CKD |  | Read codes |  | 104905 | SP08D00 | Acute-on-chronic rejection of renal transplant |
| CKD |  | Read codes |  | 12720 | 1Z1..00 | Chronic renal impairment |
| CKD |  | Read codes |  | 21837 | G232.00 | Hypertensive heart&renal dis wth (congestive) heart failure |
| Contraindication for statins |  | Read codes |  | 2926 | 44D2.00 | Liver function tests abnormal |
| Contraindication for statins |  | Read codes |  | 66469 | S741300 | Liver moderate laceration with open wound into cavity |
| Contraindication for statins |  | Read codes |  | 88994 | 7L1f.00 | Compensation for liver failure |
| Contraindication for statins |  | Read codes |  | 39351 | J635500 | Toxic liver disease with chronic active hepatitis |
| Contraindication for statins |  | Read codes |  | 73807 | 780Bz00 | Other puncture of liver NOS |
| Contraindication for statins |  | Read codes |  | 55637 | J600z00 | Acute necrosis of liver NOS |
| Contraindication for statins |  | Read codes |  | 23432 | PB6yz00 | Other liver or biliary system anomalies NOS |
| Contraindication for statins |  | Read codes |  | 72000 | PB62z00 | Congenital cystic liver disease NOS |
| Contraindication for statins |  | Read codes |  | 41433 | 44FH.00 | Alkaline phosphatase liver isoenzyme level |
| Contraindication for statins |  | Read codes |  | 19194 | 44G..00 | Liver enzymes |
| Contraindication for statins |  | Read codes |  | 6863 | J61..00 | Cirrhosis and chronic liver disease |
| Contraindication for statins |  | Read codes |  | 25869 | J63y.00 | Other specified liver disorder |
| Contraindication for statins |  | Read codes |  | 110454 | C370700 | Liver disease due to cystic fibrosis |
| Contraindication for statins |  | Read codes |  | 106489 | S740400 | Liver major laceration without open wound into cavity |
| Contraindication for statins |  | Read codes |  | 38978 | B15z.00 | Malignant neoplasm of liver and intrahepatic bile ducts NOS |
| Contraindication for statins |  | Read codes |  | 93943 | AC11.11 | Chinese liver fluke disease |
| Contraindication for statins |  | Read codes |  | 60549 | PB6..00 | Liver and biliary system anomalies |
| Contraindication for statins |  | Read codes |  | 58581 | AC13.11 | Liver flukes NOS |
| Contraindication for statins |  | Read codes |  | 102033 | S741z00 | Liver injury with open wound into cavity, NOS |
| Contraindication for statins |  | Read codes |  | 50776 | R148z00 | [D]Abnormal liver function test NOS |
| Contraindication for statins |  | Read codes |  | 7885 | J613.00 | Alcoholic liver damage unspecified |
| Contraindication for statins |  | Read codes |  | 112118 | L09y000 | Acute liver necrosis following abortive pregnancy |
| Contraindication for statins |  | Read codes |  | 92338 | 25H9.00 | O/E - liver tender |
| Contraindication for statins |  | Read codes |  | 97650 | 7L1fz00 | Compensation for liver failure NOS |
| Contraindication for statins |  | Read codes |  | 25341 | J620100 | Liver abscess due to cholangitis |
| Contraindication for statins |  | Read codes |  | 99364 | S741200 | Liver minor laceration with open wound into cavity |
| Contraindication for statins |  | Read codes |  | 44120 | J635600 | Toxic liver disease with fibrosis and cirrhosis of liver |
| Contraindication for statins |  | Read codes |  | 106025 | Jyu7600 | [X]Toxic liver disease, unspecified |
| Contraindication for statins |  | Read codes |  | 67295 | AC2y.00 | Liver echinococcus unspecified |
| Contraindication for statins |  | Read codes |  | 3256 | J63y200 | Liver cyst |
| Contraindication for statins |  | Read codes |  | 31997 | TB00200 | Liver transplant with complication, without blame |
| Contraindication for statins |  | Read codes |  | 8918 | B15..00 | Malignant neoplasm of liver and intrahepatic bile ducts |
| Contraindication for statins |  | Read codes |  | 98402 | PB63100 | Congenital absence of liver lobe |
| Contraindication for statins |  | Read codes |  | 29792 | BB5D400 | [M]Liver cell adenoma |
| Contraindication for statins |  | Read codes |  | 42843 | J61y.00 | Other non-alcoholic chronic liver disease |
| Contraindication for statins |  | Read codes |  | 4742 | 44G2.00 | Liver enzymes abnormal |
| Contraindication for statins |  | Read codes |  | 108800 | J62z.00 | Liver abscess and chronic liver disease causing sequelae NOS |
| Contraindication for statins |  | Read codes |  | 46023 | J620.00 | Liver abscess - excluding amoebic liver abscess |
| Contraindication for statins |  | Read codes |  | 31008 | J630.00 | Chronic passive liver congestion |
| Contraindication for statins |  | Read codes |  | 28350 | PB62100 | Fibrocystic liver disease |
| Contraindication for statins |  | Read codes |  | 67009 | S740200 | Liver minor laceration without open wound into cavity |
| Contraindication for statins |  | Read codes |  | 29801 | PB60000 | Liver anomaly, unspecified |
| Contraindication for statins |  | Read codes |  | 44399 | B150z00 | Primary malignant neoplasm of liver NOS |
| Contraindication for statins |  | Read codes |  | 36421 | L167z00 | Liver disorder in pregnancy NOS |
| Contraindication for statins |  | Read codes |  | 18195 | PB62000 | Congenital polycystic liver disease |
| Contraindication for statins |  | Read codes |  | 23775 | J62y.12 | Liver failure NOS |
| Contraindication for statins |  | Read codes |  | 36744 | S74z.11 | Ruptured liver NOS |
| Contraindication for statins |  | Read codes |  | 66895 | PB60.00 | Liver and biliary system anomalies, unspecified |
| Contraindication for statins |  | Read codes |  | 41673 | J635X00 | Toxic liver disease, unspecified |
| Contraindication for statins |  | Read codes |  | 21784 | PB6y900 | Liver hyperplasia |
| Contraindication for statins |  | Read codes |  | 55806 | PB6z.00 | Liver or biliary system anomalies NOS |
| Contraindication for statins |  | Read codes |  | 7533 | 25G4.00 | O/E - liver grossly enlarged |
| Contraindication for statins |  | Read codes |  | 104799 | 25H5.00 | O/E - liver grossly irregular |
| Contraindication for statins |  | Read codes |  | 105758 | 8LH..00 | Liver transplant planned |
| Contraindication for statins |  | Read codes |  | 18752 | PB6yw11 | Liver hamartoma |
| Contraindication for statins |  | Read codes |  | 4454 | J620z00 | Liver abscess NOS |
| Contraindication for statins |  | Read codes |  | 99517 | S741400 | Liver major laceration with open wound into cavity |
| Contraindication for statins |  | Read codes |  | 53582 | S740y00 | Other liver laceration without open wound into cavity |
| Contraindication for statins |  | Read codes |  | 94817 | S740300 | Liver moderate laceration without open wound into cavity |
| Contraindication for statins |  | Read codes |  | 98540 | B808z00 | Carcinoma in situ of liver or biliary system NOS |
| Contraindication for statins |  | Read codes |  | 69367 | J601z00 | Subacute necrosis of liver NOS |
| Contraindication for statins |  | Read codes |  | 26393 | B152.00 | Malignant neoplasm of liver unspecified |
| Contraindication for statins |  | Read codes |  | 1640 | J63..00 | Other liver disorders |
| Contraindication for statins |  | Read codes |  | 39945 | J600011 | Acute liver failure |
| Contraindication for statins |  | Read codes |  | 22766 | J635000 | Toxic liver disease with cholestasis |
| Contraindication for statins |  | Read codes |  | 36107 | J635100 | Toxic liver disease with hepatic necrosis |
| Contraindication for statins |  | Read codes |  | 6692 | SP08600 | Liver transplant failure and rejection |
| Contraindication for statins |  | Read codes |  | 48488 | J60..00 | Acute and subacute liver necrosis |
| Contraindication for statins |  | Read codes |  | 33715 | L12A.00 | HELLP - Syndrome haemolysis, elev liver enzyme low platelets |
| Contraindication for statins |  | Read codes |  | 103276 | S740z00 | Liver injuries without open wound into cavity, NOS |
| Contraindication for statins |  | Read codes |  | 1638 | J615z13 | Cirrhosis of liver NOS |
| Contraindication for statins |  | Read codes |  | 68692 | J620000 | Liver abscess due to portal pyaemia |
| Contraindication for statins |  | Read codes |  | 49880 | 7804z00 | Incision of liver NOS |
| Contraindication for statins |  | Read codes |  | 65678 | B715.00 | Benign neoplasm of liver and biliary ducts |
| Contraindication for statins |  | Read codes |  | 105027 | TJ41.00 | Adverse reaction to liver preps and other antianaemic agents |
| Contraindication for statins |  | Read codes |  | 73714 | S740000 | Liver injury without open wound into cavity, unspecified |
| Contraindication for statins |  | Read codes |  | 36727 | J635.00 | Toxic liver disease |
| Contraindication for statins |  | Read codes |  | 64471 | AC13.12 | Sheep liver fluke infection |
| Contraindication for statins |  | Read codes |  | 29021 | A053.00 | Amoebic liver abscess |
| Contraindication for statins |  | Read codes |  | 31897 | J62..00 | Liver abscess and sequelae of chronic liver disease |
| Contraindication for statins |  | Read codes |  | 99904 | S741100 | Liver haematoma and contusion with open wound into cavity |
| Contraindication for statins |  | Read codes |  | 71427 | B903.00 | Neoplasm of uncertain behaviour of liver and biliary passage |
| Contraindication for statins |  | Read codes |  | 41104 | J635200 | Toxic liver disease with acute hepatitis |
| Contraindication for statins |  | Read codes |  | 66673 | B808.00 | Carcinoma in situ of liver and biliary system |
| Contraindication for statins |  | Read codes |  | 9026 | ZV42700 | [V]Liver transplanted |
| Contraindication for statins |  | Read codes |  | 33597 | J61yz00 | Other non-alcoholic chronic liver disease NOS |
| Contraindication for statins |  | Read codes |  | 103715 | J620200 | Liver abscess via hepatic artery |
| Contraindication for statins |  | Read codes |  | 97157 | 7800500 | Orthotopic transplantation of liver NEC |
| Contraindication for statins |  | Read codes |  | 47861 | 7805211 | Exploration of liver transplant |
| Contraindication for statins |  | Read codes |  | 57985 | AC20.00 | Liver echinococcus granulosus |
| Contraindication for statins |  | Read codes |  | 34623 | AC25.00 | Liver echinococcus multilocularis |
| Contraindication for statins |  | Read codes |  | 46267 | S740100 | Liver haematoma and contusion without open wound into cavity |
| Contraindication for statins |  | Read codes |  | 35722 | AC10.11 | Cat liver fluke infection |
| Contraindication for statins |  | Read codes |  | 69194 | 7800200 | Replacement of previous liver transplant |
| Contraindication for statins |  | Read codes |  | 99236 | Jyu7400 | [X]Liver disorders in infectious and parasitic diseases CE |
| Contraindication for statins |  | Read codes |  | 89445 | 7800111 | Auxillary liver transplant |
| Contraindication for statins |  | Read codes |  | 112718 | B577000 | Secondary malignant neoplasm of liver intrahepatic bile duct |
| Contraindication for statins |  | Read codes |  | 113462 | S741000 | Liver injury with open wound into cavity, unspecified |
| Contraindication for statins |  | Read codes |  | 48102 | J62y.00 | Other sequelae of chronic liver disease |
| Contraindication for statins |  | Read codes |  | 17219 | J635300 | Toxic liver disease with chronic persistent hepatitis |
| Contraindication for statins |  | Read codes |  | 105459 | 7809500 | Percutaneous thermal ablation of lesion of liver NEC |
| Contraindication for statins |  | Read codes |  | 64750 | J635400 | Toxic liver disease with chronic lobular hepatitis |
| Contraindication for statins |  | Read codes |  | 113274 | PB63111 | Congenital agenesis of liver lobe |
| Contraindication for statins |  | Read codes |  | 4403 | B577.11 | Liver metastases |
| Contraindication for statins |  | Read codes |  | 27565 | PB62.00 | Congenital cystic liver disease |
| Contraindication for statins |  | Read codes |  | 25700 | ZV7C000 | [V]Assessment for liver transplant |
| Contraindication for statins |  | Read codes |  | 111744 | Q20y400 | Liver rupture due to birth trauma |
| Contraindication for statins |  | Read codes |  | 104843 | TJ41z00 | Adverse reaction to liver preps+other antianaemic agent NOS |
| Contraindication for statins |  | Read codes |  | 17222 | SP14211 | Liver failure as a complication of care |
| Contraindication for statins |  | Read codes |  | 4097 | R148.00 | [D]Abnormal liver function test |
| Contraindication for statins |  | Read codes |  | 26979 | 44DZ.00 | Liver function tests NOS |
| Contraindication for statins |  | Read codes |  | 70524 | J620300 | Liver abscess via umbilicus |
| Contraindication for statins |  | Read codes |  | 65067 | J60z.00 | Acute and subacute liver necrosis NOS |
| Contraindication for statins |  | Read codes |  | 25641 | BB5D513 | [M]Liver cell carcinoma |
| Contraindication for statins |  | Read codes |  | 21769 | J625.11 | [X] Liver failure |
| Contraindication for statins |  | Read codes |  | 70044 | PB60z00 | Unspecified liver and biliary system anomaly NOS |
| Contraindication for statins |  | Read codes |  | 10539 | J61z.00 | Chronic liver disease NOS |
| Contraindication for statins |  | Read codes |  | 22187 | B150300 | Hepatocellular carcinoma |
| Contraindication for statins |  | Read codes |  | 3034 | R091.00 | [D]Hepatomegaly |
| Contraindication for statins |  | Read codes |  | 107949 | B62E500 | Hepatosplenic T-cell lymphoma |
| Contraindication for statins |  | Read codes |  | 10636 | J624.00 | Hepatorenal syndrome |
| Contraindication for statins |  | Read codes |  | 53987 | BB5Dz00 | [M]Hepatobiliary adenoma or carcinoma NOS |
| Contraindication for statins |  | Read codes |  | 40240 | BB5D500 | [M]Hepatocellular carcinoma NOS |
| Contraindication for statins |  | Read codes |  | 31210 | B150100 | Hepatoblastoma of liver |
| Contraindication for statins |  | Read codes |  | 59451 | Q434z00 | Perinatal jaundice due to hepatocellular damage NOS |
| Contraindication for statins |  | Read codes |  | 110147 | BB5D711 | [M]Hepatocholangiocarcinoma |
| Contraindication for statins |  | Read codes |  | 58967 | 7805400 | Hepatopexy |
| Contraindication for statins |  | Read codes |  | 29546 | 7804.11 | Hepatotomy |
| Contraindication for statins |  | Read codes |  | 92680 | Q434.00 | Perinatal jaundice due to hepatocellular damage |
| Contraindication for statins |  | Read codes |  | 97314 | 8HkM.00 | Referral to hepatobiliary and pancreatic surgery service |
| Contraindication for statins |  | Read codes |  | 107299 | BB5D700 | [M]Combined hepatocellular carcinoma and cholangiocarcinoma |
| Contraindication for statins |  | Read codes |  | 26814 | BB5D512 | [M]Hepatoma, malignant |
| Contraindication for statins |  | Read codes |  | 52492 | BB5D411 | [M]Hepatocellular adenoma |
| Contraindication for statins |  | Read codes |  | 46771 | BB5D800 | [M]Hepatocellular carcinoma, fibrolamellar |
| Contraindication for statins |  | Read codes |  | 46610 | ZL1GJ00 | Under care of hepatobiliary surgeon |
| Contraindication for statins |  | Read codes |  | 48738 | PB6y100 | Congenital hepatomegaly |
| Contraindication for statins |  | Read codes |  | 104420 | 9b8G.00 | Hepatobiliary and pancreatic surgery |
| Contraindication for statins |  | Read codes |  | 42038 | R091z00 | [D]Hepatomegaly NOS |
| Contraindication for statins |  | Read codes |  | 57677 | BBL8.00 | [M]Hepatoblastoma |
| Contraindication for statins |  | Read codes |  | 9301 | 25G..11 | O/E - hepatomegaly |
| Contraindication for statins |  | Read codes |  | 111983 | A900.15 | Congenital syphilitic hepatomegaly |
| Contraindication for statins |  | Read codes |  | 71906 | Hyu5200 | [X]Hepatopulmonary syndrome |
| Contraindication for statins |  | Read codes |  | 10721 | SP14300 | Hepatorenal syndrome as a complication of care |
| Contraindication for statins |  | Read codes |  | 36031 | BB5D.00 | [M]Hepatobiliary tract adenomas and carcinomas |
| Contraindication for statins |  | Read codes |  | 66374 | J63y000 | Hepatoptosis |
| Contraindication for statins |  | Read codes |  | 20234 | BB5D511 | [M]Hepatoma NOS |
| Contraindication for statins |  | Read codes |  | 37483 | BB5D412 | [M]Hepatoma, benign |
| Contraindication for statins |  | Read codes |  | 6073 | C351000 | Hepatolenticular degeneration (Wilson's disease) |
| Contraindication for statins |  | Read codes |  | 15907 | B16z.00 | Malignant neoplasm gallbladder/extrahepatic bile ducts NOS |
| Contraindication for statins |  | Read codes |  | 66185 | AD05.00 | Toxoplasma hepatitis |
| Contraindication for statins |  | Read codes |  | 98903 | 9kV..11 | Hepatitis C screening positive |
| Contraindication for statins |  | Read codes |  | 9088 | B130.00 | Malignant neoplasm of hepatic flexure of colon |
| Contraindication for statins |  | Read codes |  | 6800 | 65Q7.00 | Viral hepatitis carrier |
| Contraindication for statins |  | Read codes |  | 71785 | J631000 | Hepatitis in coxsackie virus |
| Contraindication for statins |  | Read codes |  | 87861 | 780G.00 | Oth transjugular intrahepatic operations blood vessel liver |
| Contraindication for statins |  | Read codes |  | 8044 | J552000 | Subhepatic abscess |
| Contraindication for statins |  | Read codes |  | 30729 | 141E.00 | History of hepatitis B |
| Contraindication for statins |  | Read codes |  | 53861 | Jyu7700 | [X]Granulomatous hepatitis, not elsewhere classified |
| Contraindication for statins |  | Read codes |  | 19418 | A705400 | Hepatitis non A non B |
| Contraindication for statins |  | Read codes |  | 50400 | PB61600 | Atresia of hepatic ducts |
| Contraindication for statins |  | Read codes |  | 49042 | J634.00 | Hepatic infarction |
| Contraindication for statins |  | Read codes |  | 41096 | A707100 | Chronic viral hepatitis B without delta-agent |
| Contraindication for statins |  | Read codes |  | 26490 | J601000 | Subacute hepatic failure |
| Contraindication for statins |  | Read codes |  | 70966 | A916100 | Secondary syphilitic hepatitis |
| Contraindication for statins |  | Read codes |  | 91392 | ZC2CH00 | Dietary advice for hepatic disorder |
| Contraindication for statins |  | Read codes |  | 9029 | J614100 | Chronic active hepatitis |
| Contraindication for statins |  | Read codes |  | 60104 | J61y500 | Hepatic sclerosis |
| Contraindication for statins |  | Read codes |  | 42289 | J632z00 | Hepatitis in infectious diseases EC NOS |
| Contraindication for statins |  | Read codes |  | 107896 | AyuB200 | [X]Chronic viral hepatitis, unspecified |
| Contraindication for statins |  | Read codes |  | 111127 | 4L17.00 | Hepatitis E virus genotype determination |
| Contraindication for statins |  | Read codes |  | 98805 | AyuB000 | [X]Other specified acute viral hepatitis |
| Contraindication for statins |  | Read codes |  | 104346 | A70C.00 | Hepatitis C genotype 3 |
| Contraindication for statins |  | Read codes |  | 1467 | J632000 | Hepatitis in malaria |
| Contraindication for statins |  | Read codes |  | 103362 | 9kX..00 | Hepatitis status 6 months post treatment - enhanced serv adm |
| Contraindication for statins |  | Read codes |  | 31765 | ZV01B00 | [V]Contact with and exposure to viral hepatitis |
| Contraindication for statins |  | Read codes |  | 65050 | A704000 | Viral hepatitis C with coma |
| Contraindication for statins |  | Read codes |  | 27184 | 43q..00 | Hepatitis C virus RNA assay |
| Contraindication for statins |  | Read codes |  | 16766 | ZV02600 | [V]Viral hepatitis carrier |
| Contraindication for statins |  | Read codes |  | 89593 | B151200 | Malignant neoplasm of intrahepatic biliary passages |
| Contraindication for statins |  | Read codes |  | 48269 | PB61500 | Congenital absence of hepatic ducts |
| Contraindication for statins |  | Read codes |  | 27389 | G72yA00 | Aneurysm of hepatic artery |
| Contraindication for statins |  | Read codes |  | 48879 | J637.00 | Hepatic veno-occlusive disease |
| Contraindication for statins |  | Read codes |  | 27191 | 43j5.00 | Hepatitis C nucleic acid detection |
| Contraindication for statins |  | Read codes |  | 39080 | B803000 | Carcinoma in situ of hepatic flexure of colon |
| Contraindication for statins |  | Read codes |  | 34893 | ZV02612 | [V]Hepatitis Australia antigen carrier |
| Contraindication for statins |  | Read codes |  | 4406 | J631100 | Hepatitis in cytomegalic inclusion virus |
| Contraindication for statins |  | Read codes |  | 102565 | 4JQD.11 | Hepatitis C PCR positive |
| Contraindication for statins |  | Read codes |  | 3146 | A70..00 | Viral hepatitis |
| Contraindication for statins |  | Read codes |  | 98524 | B903200 | Neoplasm of uncertain behaviour of hepatic duct |
| Contraindication for statins |  | Read codes |  | 102067 | 780D600 | Transjugular intrahepatic pressure measurements hepatic vein |
| Contraindication for statins |  | Read codes |  | 96085 | 9kV..00 | Hepatitis C screening positive - enhanced services admin |
| Contraindication for statins |  | Read codes |  | 102569 | 4JQC.00 | Hepatitis C viral ribonucleic acid PCR negative |
| Contraindication for statins |  | Read codes |  | 93737 | 780G000 | Transjugular intrahepatic insertion stent into portal vein |
| Contraindication for statins |  | Read codes |  | 52365 | A705200 | Acute hepatitis E |
| Contraindication for statins |  | Read codes |  | 100405 | 141F.00 | History of viral hepatitis |
| Contraindication for statins |  | Read codes |  | 94116 | PB6yy00 | Other congenital anomaly of hepatic or bile ducts |
| Contraindication for statins |  | Read codes |  | 107622 | Q409z00 | Congenital viral hepatitis NOS |
| Contraindication for statins |  | Read codes |  | 33645 | 2J23.00 | Hepatitis A - current infection |
| Contraindication for statins |  | Read codes |  | 24813 | A707000 | Chronic viral hepatitis B with delta-agent |
| Contraindication for statins |  | Read codes |  | 59270 | PB6y400 | Intrahepatic gallbladder |
| Contraindication for statins |  | Read codes |  | 106017 | A709.00 | Viral hepatitis without hepatic coma |
| Contraindication for statins |  | Read codes |  | 7602 | J617000 | Chronic alcoholic hepatitis |
| Contraindication for statins |  | Read codes |  | 15489 | J614z00 | Chronic hepatitis NOS |
| Contraindication for statins |  | Read codes |  | 66534 | J614400 | Chronic lobular hepatitis |
| Contraindication for statins |  | Read codes |  | 23578 | J614000 | Chronic persistent hepatitis |
| Contraindication for statins |  | Read codes |  | 96686 | 782D000 | Endosc retrograde insert tubal prosth in both hepatic ducts |
| Contraindication for statins |  | Read codes |  | 63714 | B715100 | Benign neoplasm of intrahepatic bile ducts |
| Contraindication for statins |  | Read codes |  | 112028 | AyuB300 | [X]Unspecified viral hepatitis with coma |
| Contraindication for statins |  | Read codes |  | 111969 | 9kR..11 | Chronic hepatitis annual review |
| Contraindication for statins |  | Read codes |  | 104686 | J632300 | Hepatitis in toxoplasmosis |
| Contraindication for statins |  | Read codes |  | 92972 | SB22200 | Hepatic artery injury |
| Contraindication for statins |  | Read codes |  | 93873 | 782M500 | Percutaneous transhepatic biliary drainage single |
| Contraindication for statins |  | Read codes |  | 41386 | J635700 | Acute hepatic failure due to drugs |
| Contraindication for statins |  | Read codes |  | 102263 | 782T000 | Percutaneous transhepatic removal of calculus from bile duct |
| Contraindication for statins |  | Read codes |  | 107058 | 65F2000 | Second hepatitis B junior vaccination |
| Contraindication for statins |  | Read codes |  | 95078 | 7822200 | Revision of anastomosis of hepatic duct |
| Contraindication for statins |  | Read codes |  | 27250 | 43M2.00 | Hepatitis A test positive |
| Contraindication for statins |  | Read codes |  | 1754 | J614.00 | Chronic hepatitis |
| Contraindication for statins |  | Read codes |  | 7947 | J631200 | Hepatitis in infectious mononucleosis |
| Contraindication for statins |  | Read codes |  | 68967 | AyuB.00 | [X]Viral hepatitis |
| Contraindication for statins |  | Read codes |  | 34358 | J632.00 | Hepatitis in other infectious diseases EC |
| Contraindication for statins |  | Read codes |  | 33316 | 43jG.00 | Hepatitis B nucleic acid detection |
| Contraindication for statins |  | Read codes |  | 63456 | J632200 | Hepatitis in secondary syphilis |
| Contraindication for statins |  | Read codes |  | 107093 | 780G100 | Transjugular intrahepatic ins stent graft into portal vein |
| Contraindication for statins |  | Read codes |  | 74896 | B161z00 | Malignant neoplasm of extrahepatic bile ducts NOS |
| Contraindication for statins |  | Read codes |  | 32657 | A705100 | Acute delta-(super)infection of hepatitis B carrier |
| Contraindication for statins |  | Read codes |  | 24901 | J625.00 | [X] Hepatic failure |
| Contraindication for statins |  | Read codes |  | 65924 | 7822 | Connection of hepatic duct |
| Contraindication for statins |  | Read codes |  | 109482 | 43XA.00 | Hepatitis B core antibody positive |
| Contraindication for statins |  | Read codes |  | 2860 | A703.00 | Viral (serum) hepatitis B |
| Contraindication for statins |  | Read codes |  | 36194 | SP14200 | Hepatic failure as a complication of care |
| Contraindication for statins |  | Read codes |  | 57925 | 7822100 | Anastomosis of hepatic duct to jejunum NEC |
| Contraindication for statins |  | Read codes |  | 29916 | B713000 | Benign neoplasm of hepatic flexure of colon |
| Contraindication for statins |  | Read codes |  | 98609 | J631400 | Hepatitis in yellow fever |
| Contraindication for statins |  | Read codes |  | 93945 | A98yy13 | Gonococcal perihepatitis |
| Contraindication for statins |  | Read codes |  | 71114 | A98yy11 | Gonococcal hepatitis |
| Contraindication for statins |  | Read codes |  | 104572 | 9NgR.00 | On hepatitis C treatment plan |
| Contraindication for statins |  | Read codes |  | 16062 | J62y.13 | Hepatic failure |
| Contraindication for statins |  | Read codes |  | 53480 | J614300 | Recurrent hepatitis |
| Contraindication for statins |  | Read codes |  | 32277 | A707X00 | Chronic viral hepatitis, unspecified |
| Contraindication for statins |  | Read codes |  | 104628 | 780D400 | Transjugular intrahepatic venography of portal vein |
| Contraindication for statins |  | Read codes |  | 26037 | C32y511 | Hepatic familial steatosis |
| Contraindication for statins |  | Read codes |  | 2413 | A70z000 | Hepatitis C |
| Contraindication for statins |  | Read codes |  | 106642 | A707300 | Chronic viral hepatitis B |
| Contraindication for statins |  | Read codes |  | 89587 | A704z00 | Other specified viral hepatitis with hepatic coma NOS |
| Contraindication for statins |  | Read codes |  | 3142 | A701.00 | Viral (infectious) hepatitis A |
| Contraindication for statins |  | Read codes |  | 26367 | A707.00 | Chronic viral hepatitis |
| Contraindication for statins |  | Read codes |  | 33428 | 2J22.00 | Hepatitis A non immune |
| Contraindication for statins |  | Read codes |  | 30926 | A705.00 | Other specified viral hepatitis without coma |
| Contraindication for statins |  | Read codes |  | 71453 | J615z15 | Hepatic fibrosis |
| Contraindication for statins |  | Read codes |  | 110411 | 8BB5.00 | 12 week virologic response to hepatitis C treatment |
| Contraindication for statins |  | Read codes |  | 20676 | G820.00 | Budd - Chiari syndrome (hepatic vein thrombosis) |
| Contraindication for statins |  | Read codes |  | 111976 | A708.00 | Viral hepatitis with hepatic coma |
| Contraindication for statins |  | Read codes |  | 19512 | C310400 | Glycogenosis with hepatic cirrhosis |
| Contraindication for statins |  | Read codes |  | 8445 | 2J11.00 | Hepatitis C immune |
| Contraindication for statins |  | Read codes |  | 104277 | 14i..00 | H/O hepatitis C antiviral drug therapy |
| Contraindication for statins |  | Read codes |  | 50458 | PB61412 | Extrahepatic atresia of bile duct |
| Contraindication for statins |  | Read codes |  | 65889 | PB61411 | Intrahepatic atresia of bile duct |
| Contraindication for statins |  | Read codes |  | 62973 | 782L300 | Percutaneous insert tubal prosthesis into hepatic duct NEC |
| Contraindication for statins |  | Read codes |  | 72570 | J638.00 | Peliosis hepatis |
| Contraindication for statins |  | Read codes |  | 37501 | B808200 | Carcinoma in situ of hepatic duct |
| Contraindication for statins |  | Read codes |  | 2834 | A705000 | Viral hepatitis C without mention of hepatic coma |
| Contraindication for statins |  | Read codes |  | 40762 | Q409000 | Congenital hepatitis A infection |
| Contraindication for statins |  | Read codes |  | 65335 | A705z00 | Other specified viral hepatitis without mention of coma NOS |
| Contraindication for statins |  | Read codes |  | 60312 | B16y.00 | Malignant neoplasm other gallbladder/extrahepatic bile duct |
| Contraindication for statins |  | Read codes |  | 96266 | 7N45500 | [SO]Hepatic artery |
| Contraindication for statins |  | Read codes |  | 27176 | 43B7.00 | Hepatitis C non-immune |
| Contraindication for statins |  | Read codes |  | 24912 | 2J12.00 | Hepatitis C non immune |
| Contraindication for statins |  | Read codes |  | 71169 | 7822000 | Anast hepatic duct to transp jejunum+insert tubal prosth |
| Contraindication for statins |  | Read codes |  | 89147 | 782M400 | Percutaneous transhepatic biliary drainage multiple |
| Contraindication for statins |  | Read codes |  | 22411 | J622.11 | Encephalopathy - hepatic |
| Contraindication for statins |  | Read codes |  | 69425 | 7822.11 | Anastomosis of hepatic duct |
| Contraindication for statins |  | Read codes |  | 7943 | J617.00 | Alcoholic hepatitis |
| Contraindication for statins |  | Read codes |  | 1755 | J614200 | Chronic aggressive hepatitis |
| Contraindication for statins |  | Read codes |  | 104341 | A70A.00 | Hepatitis C genotype 1 |
| Contraindication for statins |  | Read codes |  | 899 | J633.00 | Hepatitis unspecified |
| Contraindication for statins |  | Read codes |  | 41237 | J631.00 | Hepatitis in viral diseases EC |
| Contraindication for statins |  | Read codes |  | 49423 | 780D200 | Transjugular intrahepatic thrombolysis of portal vein |
| Contraindication for statins |  | Read codes |  | 105664 | A70B.00 | Hepatitis C genotype 2 |
| Contraindication for statins |  | Read codes |  | 49200 | 43X8.00 | Hepatitis E IgM level |
| Contraindication for statins |  | Read codes |  | 89146 | 782P400 | Percutaneous transhepatic cholangiography |
| Contraindication for statins |  | Read codes |  | 56066 | 4J3D.00 | Hepatitis B viral load |
| Contraindication for statins |  | Read codes |  | 16915 | B151.00 | Malignant neoplasm of intrahepatic bile ducts |
| Contraindication for statins |  | Read codes |  | 28798 | J63y100 | Nonspecific reactive hepatitis |
| Contraindication for statins |  | Read codes |  | 112152 | Q409y00 | Other specified congenital viral hepatitis |
| Contraindication for statins |  | Read codes |  | 69053 | A702.00 | Viral hepatitis B with coma |
| Contraindication for statins |  | Read codes |  | 57100 | G820.11 | Hepatic vein thrombosis |
| Contraindication for statins |  | Read codes |  | 42222 | J631z00 | Hepatitis in viral diseases EC NOS |
| Contraindication for statins |  | Read codes |  | 27663 | J63X.00 | Granulomatous hepatitis, not elsewhere classified |
| Contraindication for statins |  | Read codes |  | 98568 | ######## | Percutaneous transluminal insertion stent hepatic artery NEC |
| Contraindication for statins |  | Read codes |  | 61643 | B151z00 | Malignant neoplasm of intrahepatic bile ducts NOS |
| Contraindication for statins |  | Read codes |  | 67779 | Q409.00 | Congenital viral hepatitis |
| Contraindication for statins |  | Read codes |  | 104435 | A70z100 | Acute viral hepatitis NOS |
| Contraindication for statins |  | Read codes |  | 55962 | A700.00 | Viral hepatitis A with coma |
| Contraindication for statins |  | Read codes |  | 111975 | A706.00 | Unspecified viral hepatitis with coma |
| Contraindication for statins |  | Read codes |  | 69552 | A704.00 | Other specified viral hepatitis with coma |
| Contraindication for statins |  | Read codes |  | 18652 | J63B.00 | Autoimmune hepatitis |
| Contraindication for statins |  | Read codes |  | 71240 | 780D300 | Transjugular intrahepatic creation of portosystemic shunt |
| Contraindication for statins |  | Read codes |  | 63409 | 7824100 | Open insert tubal prosthes in one hepatic+common bile ducts |
| Contraindication for statins |  | Read codes |  | 34087 | A785200 | Cytomegaloviral hepatitis |
| Contraindication for statins |  | Read codes |  | 69878 | 43jJ.00 | Hepatitis D nucleic acid detection |
| Contraindication for statins |  | Read codes |  | 97441 | 7820400 | Excision of extrahepatic bile ducts HFQ |
| Contraindication for statins |  | Read codes |  | 34642 | Q48yz11 | Congenital hepatic fibrosis |
| Contraindication for statins |  | Read codes |  | 89000 | 7801500 | Left hepatic trisegmentectomy |
| Contraindication for statins |  | Read codes |  | 104243 | 4JQF.00 | Hepatitis C antigen positive |
| Contraindication for statins |  | Read codes |  | 106878 | 65MF000 | Third combined paediatric hepatitis A and B vaccination |
| Contraindication for statins |  | Read codes |  | 34903 | PB62.11 | Congenital hepatic cyst |
| Contraindication for statins |  | Read codes |  | 15562 | J633000 | Toxic hepatitis |
| Contraindication for statins |  | Read codes |  | 30586 | A707200 | Chronic viral hepatitis C |
| Contraindication for statins |  | Read codes |  | 99898 | 9kR..00 | Chronic hepatitis annual review - enhanced services admin |
| Contraindication for statins |  | Read codes |  | 5219 | J633z00 | Hepatitis unspecified NOS |
| Contraindication for statins |  | Read codes |  | 35589 | 4JQ3.00 | Hepatitis C virus genotype |
| Contraindication for statins |  | Read codes |  | 11431 | ZV02B00 | [V]Hepatitis B carrier |
| Contraindication for statins |  | Read codes |  | 6690 | J600000 | Acute hepatic failure |
| Contraindication for statins |  | Read codes |  | 52537 | B161100 | Malignant neoplasm of hepatic duct |
| Contraindication for statins |  | Read codes |  | 112045 | J632100 | Hepatitis in late syphilis |
| Contraindication for statins |  | Read codes |  | 111978 | A70F.00 | Hepatitis C genotype 6 |
| Contraindication for statins |  | Read codes |  | 49490 | G74y900 | Embolism and thrombosis of the hepatic artery |
| Contraindication for statins |  | Read codes |  | 27175 | 43B4.00 | Hepatitis B surface antig +ve |
| Contraindication for statins |  | Read codes |  | 58876 | J631500 | Hepatitis in other viral disease |
| Contraindication for statins |  | Read codes |  | 65823 | 7822300 | Open dilation of anastomosis of hepatic duct |
| Contraindication for statins |  | Read codes |  | 104225 | Q434100 | Giant cell hepatitis causing neonatal jaundice |
| Contraindication for statins |  | Read codes |  | 97816 | 7822z00 | Connection of hepatic duct NOS |
| Contraindication for statins |  | Read codes |  | 95048 | 7824000 | Open insert tubal prosthes in both hepatic+common bile ducts |
| Contraindication for statins |  | Read codes |  | 1440 | A701.11 | Infective hepatitis |
| Contraindication for statins |  | Read codes |  | 23511 | J622.00 | Hepatic coma |
| Contraindication for statins |  | Read codes |  | 40844 | AC8y100 | Capillaria hepatica |
| Contraindication for statins |  | Read codes |  | 3216 | J611.00 | Acute alcoholic hepatitis |
| Contraindication for statins |  | Read codes |  | 100592 | J61y600 | Hepatic fibrosis with hepatic sclerosis |
| Contraindication for statins |  | Read codes |  | 53877 | J614y00 | Chronic hepatitis unspecified |
| Contraindication for statins |  | Read codes |  | 63116 | 7801600 | Right hepatic trisegmentectomy |
| Contraindication for statins |  | Read codes |  | 22168 | J601100 | Subacute hepatitis - noninfective |
| Contraindication for statins |  | Read codes |  | 101535 | J631600 | Hepatitis + adenovirus |
| Contraindication for statins |  | Read codes |  | 70083 | SB21100 | Hepatic vein injury |
| Contraindication for statins |  | Read codes |  | 35625 | Q434000 | Perinatal hepatitis causing jaundice, unspecified |
| Contraindication for statins |  | Read codes |  | 34316 | 7N33311 | [SO]Hepatic duct NEC |
| Contraindication for statins |  | Read codes |  | 58088 | B151400 | Malignant neoplasm of intrahepatic gall duct |
| Contraindication for statins |  | Read codes |  | 111206 | J631300 | Hepatitis in mumps |
| Contraindication for statins |  | Read codes |  | 23433 | B161.00 | Malignant neoplasm of extrahepatic bile ducts |
| Contraindication for statins |  | Read codes |  | 26405 | J63A.00 | Hepatic granulomas in sarcoidosis |
| Contraindication for statins |  | Read codes |  | 28703 | ZV02C00 | [V]Hepatitis C carrier |
| Contraindication for statins |  | Read codes |  | 15855 | J600100 | Acute hepatitis - noninfective |
| Contraindication for statins |  | Read codes |  | 66899 | J639.00 | Hepatic granulomas in berylliosis |
| Contraindication for statins |  | Read codes |  | 45939 | AE23.00 | Sequelae of viral hepatitis |
| Contraindication for statins |  | Read codes |  | 17330 | J613000 | Alcoholic hepatic failure |
| Contraindication for statins |  | Read codes |  | 7957 | J614111 | Autoimmune chronic active hepatitis |
| Contraindication for statins |  | Read codes |  | 99649 | P744.00 | Portal vein - hepatic artery fistula |
| Contraindication for statins |  | Read codes |  | 112029 | AyuB400 | [X]Unspecified viral hepatitis without coma |
| Contraindication for statins |  | Read codes |  | 27174 | 43B5.00 | Hepatitis e antigen present |
| Contraindication for statins |  | Read codes |  | 5988 | 2J21.00 | Hepatitis A immune |
| Contraindication for statins |  | Read codes |  | 98148 | J61y800 | Nonalcoholic steatohepatitis |
| Contraindication for statins |  | Read codes |  | 104579 | A70G.00 | Acute hepatitis C |
| Contraindication for statins |  | Read codes |  | 94033 | 7.80E+02 | Percutan transluminal insertion stent graft hepatic artery |
| Contraindication for statins |  | Read codes |  | 59579 | 7808000 | Percutaneous transluminal embolisation of hepatic artery |
| Contraindication for statins |  | Read codes |  | 25383 | J61y400 | Hepatic fibrosis |
| Contraindication for statins |  | Read codes |  | 30884 | 4J3B.00 | Hepatitis C viral load |
| Contraindication for statins |  | Read codes |  | 50245 | Q409100 | Congenital hepatitis B infection |
| Contraindication for statins |  | Read codes |  | 108343 | AyuB100 | [X]Other chronic viral hepatitis |
| Contraindication for statins |  | Read codes |  | 25589 | C376100 | Alpha-1-antitrypsin hepatitis |
| Contraindication for statins |  | Read codes |  | 62214 | B715400 | Benign neoplasm of hepatic duct |
| Contraindication for statins |  | Read codes |  | 70649 | A72x000 | Mumps hepatitis |
| Contraindication for statins |  | Read codes |  | 99580 | B808100 | Carcinoma in situ of intrahepatic bile ducts |
| Contraindication for statins |  | Read codes |  | 63155 | 7822y00 | Other specified connection of hepatic duct |
| Contraindication for statins |  | Read codes |  | 20137 | A70z.00 | Unspecified viral hepatitis |
| Contraindication for statins |  | Read codes |  | 14106 | 43d8.00 | Hepatitis B surface antibody level |
| Contraindication for statins |  | Read codes |  | 102568 | 4JQD.00 | Hepatitis C viral ribonucleic acid PCR positive |
| Contraindication for statins |  | Read codes |  | 101954 | AyuJ900 | [X]Sequelae of viral hepatitis |
| Contraindication for statins |  | Read codes |  | 111977 | A70E.00 | Hepatitis C genotype 5 |
| Contraindication for statins |  | Read codes |  | 28904 | 65PM.00 | Hepatitis C contact |
| Contraindication for statins |  | Read codes |  | 54103 | B16..00 | Malignant neoplasm gallbladder and extrahepatic bile ducts |
| Contraindication for statins |  | Read codes |  | 104892 | A70D.00 | Hepatitis C genotype 4 |
| Contraindication for statins |  | Read codes |  | 56070 | J62y.11 | Hepatic failure NOS |
| Contraindication for statins |  | Read codes |  | 97735 | 9kZ..11 | Hepatitis B screening positive |
| Contraindication for statins |  | Read codes |  | 95926 | 9kZ..00 | Hepatitis B screening positive - enhanced services admin |
| Contraindication for statins |  | Read codes |  | 100834 | 7Q05200 | Hepatitis B treatment drugs Band 1 |
| Contraindication for statins |  | Read codes |  | 28568 | 43X3.00 | Hepatitis C antibody test positive |
| Contraindication for statins |  | Read codes |  | 112044 | J615F00 | Syphilitic portal cirrhosis |
| Contraindication for statins |  | Read codes |  | 69204 | J615100 | Multilobular portal cirrhosis |
| Contraindication for statins |  | Read codes |  | 95118 | 780E400 | Percutan transluminal insertion of stent graft portal vein |
| Contraindication for statins |  | Read codes |  | 109540 | J615G00 | Zooparasitic portal cirrhosis |
| Contraindication for statins |  | Read codes |  | 40567 | J615600 | Capsular portal cirrhosis |
| Contraindication for statins |  | Read codes |  | 56596 | SB23.00 | Portal and splenic vein injury |
| Contraindication for statins |  | Read codes |  | 73482 | J615D00 | Bacterial portal cirrhosis |
| Contraindication for statins |  | Read codes |  | 27438 | J615700 | Cardiac portal cirrhosis |
| Contraindication for statins |  | Read codes |  | 55454 | J615y00 | Portal cirrhosis unspecified |
| Contraindication for statins |  | Read codes |  | 47257 | J615.11 | Portal cirrhosis |
| Contraindication for statins |  | Read codes |  | 40963 | J61y300 | Portal fibrosis without cirrhosis |
| Contraindication for statins |  | Read codes |  | 44676 | J615400 | Fatty portal cirrhosis |
| Contraindication for statins |  | Read codes |  | 5129 | J623.00 | Portal hypertension |
| Contraindication for statins |  | Read codes |  | 100253 | J615C00 | Xanthomatous portal cirrhosis |
| Contraindication for statins |  | Read codes |  | 92909 | J615500 | Hypertrophic portal cirrhosis |
| Contraindication for statins |  | Read codes |  | 46278 | J621.11 | Phlebitis of portal vein |
| Contraindication for statins |  | Read codes |  | 8769 | G81..00 | Portal vein thrombosis |
| Contraindication for statins |  | Read codes |  | 96664 | J615800 | Juvenile portal cirrhosis |
| Contraindication for statins |  | Read codes |  | 103251 | SB23z00 | Portal and splenic vein injury NOS |
| Contraindication for statins |  | Read codes |  | 63404 | J621.00 | Portal pyaemia |
| Contraindication for statins |  | Read codes |  | 89356 | ######## | Percutaneous transluminal insertion of stent portal vein |
| Contraindication for statins |  | Read codes |  | 49717 | 7808100 | Percutaneous transluminal embolisation of portal vein |
| Contraindication for statins |  | Read codes |  | 10431 | J661.00 | Cholangitis |
| Contraindication for statins |  | Read codes |  | 34753 | J661400 | Ascending cholangitis |
| Contraindication for statins |  | Read codes |  | 64412 | J661z00 | Cholangitis NOS |
| Contraindication for statins |  | Read codes |  | 15425 | J661700 | Primary sclerosing cholangitis |
| Contraindication for statins |  | Read codes |  | 51530 | J661100 | Chronic cholangitis |
| Contraindication for statins |  | Read codes |  | 33339 | J661y00 | Other cholangitis |
| Contraindication for statins |  | Read codes |  | 97670 | J661600 | Obliterative cholangitis |
| Contraindication for statins |  | Read codes |  | 40416 | J661000 | Acute cholangitis |
| Contraindication for statins |  | Read codes |  | 44791 | J661900 | Sclerosing cholangitis unspecified |
| Contraindication for statins |  | Read codes |  | 41470 | J661300 | Suppurative cholangitis |
| Contraindication for statins |  | Read codes |  | 35667 | J661800 | Secondary sclerosing cholangitis |
| Contraindication for statins |  | Read codes |  | 24866 | J646.00 | Calculus of bile duct with cholangitis |
| Contraindication for statins |  | Read codes |  | 15678 | J661200 | Recurrent cholangitis |
| Contraindication for statins |  | Read codes |  | 66226 | J661500 | Cholangitis lenta |
| Contraindication for statins |  | Read codes |  | 94114 | 44F5000 | Alkaline phosphatase bone isoenzyme raised |
| Contraindication for statins |  | Read codes |  | 18091 | R104200 | [D]Alkaline phosphatase raised |
| Contraindication for statins |  | Read codes |  | 105209 | K045.00 | Acute renal failure due to non-traumatic rhabdomyolysis |
| Contraindication for statins |  | Read codes |  | 105267 | K04B.00 | Acute renal failure due to traumatic rhabdomyolysis |
| Contraindication for statins |  | Read codes |  | 95831 | N233300 | Rhabdomyolysis |
| Contraindication for statins |  | Read codes |  | 98532 | SK09.00 | Traumatic rhabdomyolysis |
| Contraindication for statins |  | Read codes |  | 24676 | SK08.00 | Acute renal failure due to rhabdomyolysis |
| DM | TOD | Read codes |  | 91943 | C10EC11 | Type I diabetes mellitus with polyneuropathy |
| DM | TOD | Read codes |  | 101311 | C10EC12 | Insulin dependent diabetes mellitus with polyneuropathy |
| DM | TOD | Read codes |  | 13279 | C104y00 | Other specified diabetes mellitus with renal complications |
| DM | TOD | Read codes |  | 99311 | C10E111 | Type I diabetes mellitus with ophthalmic complications |
| DM | TOD | Read codes |  | 18642 | C10EH00 | Type 1 diabetes mellitus with arthropathy |
| DM | TOD | Read codes |  | 47649 | C10E100 | Type 1 diabetes mellitus with ophthalmic complications |
| DM | TOD | Read codes |  | 62674 | C10FA00 | Type 2 diabetes mellitus with mononeuropathy |
| DM | TOD | Read codes |  | 5002 | F372.11 | Diabetic polyneuropathy |
| DM | TOD | Read codes |  | 2342 | F372.12 | Diabetic neuropathy |
| DM | TOD | Read codes |  | 47584 | F420500 | Advanced diabetic retinal disease |
| DM | TOD | Read codes |  | 42831 | C10E200 | Type 1 diabetes mellitus with neurological complications |
| DM | TOD | Read codes |  | 13103 | 2BBS.00 | O/E - left eye preproliferative diabetic retinopathy |
| DM | TOD | Read codes |  | 69993 | C10E600 | Type 1 diabetes mellitus with gangrene |
| DM | TOD | Read codes |  | 26054 | C10FL00 | Type 2 diabetes mellitus with persistent proteinuria |
| DM | TOD | Read codes |  | 47582 | C10E000 | Type 1 diabetes mellitus with renal complications |
| DM | TOD | Read codes |  | 93878 | C10E511 | Type I diabetes mellitus with ulcer |
| DM | TOD | Read codes |  | 26666 | 2G5E.00 | O/E - Right diabetic foot at low risk |
| DM | TOD | Read codes |  | 39317 | C106100 | Diabetes mellitus, adult onset, + neurological manifestation |
| DM | TOD | Read codes |  | 37806 | C10FF00 | Type 2 diabetes mellitus with peripheral angiopathy |
| DM | TOD | Read codes |  | 10098 | C10yy00 | Other specified diabetes mellitus with other spec comps |
| DM | TOD | Read codes |  | 99231 | C108B11 | Type I diabetes mellitus with mononeuropathy |
| DM | TOD | Read codes |  | 98616 | C10F211 | Type II diabetes mellitus with neurological complications |
| DM | TOD | Read codes |  | 107597 | 9m0D.00 | Excluded from diabetic retinopthy screen as learn disability |
| DM | TOD | Read codes |  | 44260 | C108F00 | Insulin dependent diabetes mellitus with diabetic cataract |
| DM | TOD | Read codes |  | 62384 | 2G5V.00 | O/E - right chronic diabetic foot ulcer |
| DM | TOD | Read codes |  | 44443 | C108500 | Insulin dependent diabetes mellitus with ulcer |
| DM | TOD | Read codes |  | 106329 | 9m08.00 | Excluded from diabetic retinopathy screening as blind |
| DM | TOD | Read codes |  | 40401 | C109500 | Non-insulin dependent diabetes mellitus with gangrene |
| DM | TOD | Read codes |  | 49074 | C10F400 | Type 2 diabetes mellitus with ulcer |
| DM | TOD | Read codes |  | 1323 | F420.00 | Diabetic retinopathy |
| DM | TOD | Read codes |  | 61523 | C106y00 | Other specified diabetes mellitus with neurological comps |
| DM | TOD | Read codes |  | 18142 | N030000 | Diabetic cheiroarthropathy |
| DM | TOD | Read codes |  | 63357 | C107100 | Diabetes mellitus, adult, + peripheral circulatory disorder |
| DM | TOD | Read codes |  | 21983 | C108012 | Type 1 diabetes mellitus with renal complications |
| DM | TOD | Read codes |  | 31171 | 2G5G.00 | O/E - Right diabetic foot at high risk |
| DM | TOD | Read codes |  | 18683 | C10E500 | Type 1 diabetes mellitus with ulcer |
| DM | TOD | Read codes |  | 52041 | 2BBl.00 | O/E - left eye stable treated prolif diabetic retinopathy |
| DM | TOD | Read codes |  | 11433 | 2BBP.00 | O/E - right eye background diabetic retinopathy |
| DM | TOD | Read codes |  | 50527 | C10FB11 | Type II diabetes mellitus with polyneuropathy |
| DM | TOD | Read codes |  | 60499 | C108600 | Insulin dependent diabetes mellitus with gangrene |
| DM | TOD | Read codes |  | 24693 | C109G00 | Non-insulin dependent diabetes mellitus with arthropathy |
| DM | TOD | Read codes |  | 3837 | F420400 | Diabetic maculopathy |
| DM | TOD | Read codes |  | 10099 | F420300 | Advanced diabetic maculopathy |
| DM | TOD | Read codes |  | 59903 | C106.11 | Diabetic amyotrophy |
| DM | TOD | Read codes |  | 7795 | C106.12 | Diabetes mellitus with neuropathy |
| DM | TOD | Read codes |  | 16491 | C106.13 | Diabetes mellitus with polyneuropathy |
| DM | TOD | Read codes |  | 46301 | C10EC00 | Type 1 diabetes mellitus with polyneuropathy |
| DM | TOD | Read codes |  | 18390 | C10FM00 | Type 2 diabetes mellitus with persistent microalbuminuria |
| DM | TOD | Read codes |  | 10418 | C10ED00 | Type 1 diabetes mellitus with nephropathy |
| DM | TOD | Read codes |  | 62352 | C108H11 | Type I diabetes mellitus with arthropathy |
| DM | TOD | Read codes |  | 58604 | C109611 | Type II diabetes mellitus with retinopathy |
| DM | TOD | Read codes |  | 42762 | C109612 | Type 2 diabetes mellitus with retinopathy |
| DM | TOD | Read codes |  | 95351 | C10FA11 | Type II diabetes mellitus with mononeuropathy |
| DM | TOD | Read codes |  | 31790 | F372.00 | Polyneuropathy in diabetes |
| DM | TOD | Read codes |  | 7045 | 14F4.00 | H/O: Admission in last year for diabetes foot problem |
| DM | TOD | Read codes |  | 102112 | C10E611 | Type I diabetes mellitus with gangrene |
| DM | TOD | Read codes |  | 109051 | C10E612 | Insulin dependent diabetes mellitus with gangrene |
| DM | TOD | Read codes |  | 68792 | C10z000 | Diabetes mellitus, juvenile type, + unspecified complication |
| DM | TOD | Read codes |  | 9881 | M271200 | Mixed diabetic ulcer - foot |
| DM | TOD | Read codes |  | 24694 | C108B00 | Insulin dependent diabetes mellitus with mononeuropathy |
| DM | TOD | Read codes |  | 34268 | C10F200 | Type 2 diabetes mellitus with neurological complications |
| DM | TOD | Read codes |  | 37315 | F3y0.00 | Diabetic mononeuropathy |
| DM | TOD | Read codes |  | 34912 | C109400 | Non-insulin dependent diabetes mellitus with ulcer |
| DM | TOD | Read codes |  | 93922 | C104000 | Diabetes mellitus, juvenile type, with renal manifestation |
| DM | TOD | Read codes |  | 105302 | K08yA00 | Proteinuric diabetic nephropathy |
| DM | TOD | Read codes |  | 25591 | C10FQ00 | Type 2 diabetes mellitus with exudative maculopathy |
| DM | TOD | Read codes |  | 51957 | C108511 | Type I diabetes mellitus with ulcer |
| DM | TOD | Read codes |  | 65025 | C107z00 | Diabetes mellitus NOS with peripheral circulatory disorder |
| DM | TOD | Read codes |  | 34283 | C105z00 | Diabetes mellitus NOS with ophthalmic manifestation |
| DM | TOD | Read codes |  | 24571 | F372200 | Asymptomatic diabetic neuropathy |
| DM | TOD | Read codes |  | 70448 | C107000 | Diabetes mellitus, juvenile +peripheral circulatory disorder |
| DM | TOD | Read codes |  | 11626 | F420z00 | Diabetic retinopathy NOS |
| DM | TOD | Read codes |  | 17067 | F171100 | Autonomic neuropathy due to diabetes |
| DM | TOD | Read codes |  | 66475 | 66Ak.00 | Diabetic monitoring - lower risk albumin excretion |
| DM | TOD | Read codes |  | 102163 | C10ED12 | Insulin dependent diabetes mellitus with nephropathy |
| DM | TOD | Read codes |  | 91942 | C10E311 | Type I diabetes mellitus with multiple complications |
| DM | TOD | Read codes |  | 45276 | C10E312 | Insulin dependent diabetes mellitus with multiple complicat |
| DM | TOD | Read codes |  | 57333 | N030011 | Diabetic cheiropathy |
| DM | TOD | Read codes |  | 46963 | C108000 | Insulin-dependent diabetes mellitus with renal complications |
| DM | TOD | Read codes |  | 10755 | F420600 | Non proliferative diabetic retinopathy |
| DM | TOD | Read codes |  | 32556 | C107.12 | Diabetes with gangrene |
| DM | TOD | Read codes |  | 32403 | C107.11 | Diabetes mellitus with gangrene |
| DM | TOD | Read codes |  | 6509 | C108700 | Insulin dependent diabetes mellitus with retinopathy |
| DM | TOD | Read codes |  | 59253 | C10FG00 | Type 2 diabetes mellitus with arthropathy |
| DM | TOD | Read codes |  | 68105 | C10EB00 | Type 1 diabetes mellitus with mononeuropathy |
| DM | TOD | Read codes |  | 50429 | C109100 | Non-insulin-dependent diabetes mellitus with ophthalm comps |
| DM | TOD | Read codes |  | 18425 | C10FB00 | Type 2 diabetes mellitus with polyneuropathy |
| DM | TOD | Read codes |  | 7328 | M037200 | Cellulitis in diabetic foot |
| DM | TOD | Read codes |  | 102946 | C10E012 | Insulin-dependent diabetes mellitus with renal complications |
| DM | TOD | Read codes |  | 109837 | C10E011 | Type I diabetes mellitus with renal complications |
| DM | TOD | Read codes |  | 48192 | C109E11 | Type II diabetes mellitus with diabetic cataract |
| DM | TOD | Read codes |  | 100347 | C10A500 | Malnutritn-relat diabetes melitus wth periph circul complctn |
| DM | TOD | Read codes |  | 22871 | C10EP00 | Type 1 diabetes mellitus with exudative maculopathy |
| DM | TOD | Read codes |  | 112402 | C107y00 | Other specified diabetes mellitus with periph circ comps |
| DM | TOD | Read codes |  | 57621 | C108D00 | Insulin dependent diabetes mellitus with nephropathy |
| DM | TOD | Read codes |  | 16230 | C106.00 | Diabetes mellitus with neurological manifestation |
| DM | TOD | Read codes |  | 31157 | 2G5F.00 | O/E - Right diabetic foot at moderate risk |
| DM | TOD | Read codes |  | 70316 | C109112 | Type 2 diabetes mellitus with ophthalmic complications |
| DM | TOD | Read codes |  | 59725 | C109111 | Type II diabetes mellitus with ophthalmic complications |
| DM | TOD | Read codes |  | 10824 | 9N1i.00 | Seen in diabetic foot clinic |
| DM | TOD | Read codes |  | 17545 | C108F11 | Type I diabetes mellitus with diabetic cataract |
| DM | TOD | Read codes |  | 66872 | C108D11 | Type I diabetes mellitus with nephropathy |
| DM | TOD | Read codes |  | 113197 | C108D12 | Type 1 diabetes mellitus with nephropathy |
| DM | TOD | Read codes |  | 57278 | C10F011 | Type II diabetes mellitus with renal complications |
| DM | TOD | Read codes |  | 64571 | C109C11 | Type II diabetes mellitus with nephropathy |
| DM | TOD | Read codes |  | 24836 | C109C12 | Type 2 diabetes mellitus with nephropathy |
| DM | TOD | Read codes |  | 63762 | C10z100 | Diabetes mellitus, adult onset, + unspecified complication |
| DM | TOD | Read codes |  | 85991 | C10FM11 | Type II diabetes mellitus with persistent microalbuminuria |
| DM | TOD | Read codes |  | 65616 | C108H00 | Insulin dependent diabetes mellitus with arthropathy |
| DM | TOD | Read codes |  | 17313 | F440700 | Diabetic iritis |
| DM | TOD | Read codes |  | 11663 | M271100 | Neuropathic diabetic ulcer - foot |
| DM | TOD | Read codes |  | 50609 | L180600 | Pre-existing diabetes mellitus, non-insulin-dependent |
| DM | TOD | Read codes |  | 55842 | C109200 | Non-insulin-dependent diabetes mellitus with neuro comps |
| DM | TOD | Read codes |  | 31053 | R054300 | [D]Widespread diabetic foot gangrene |
| DM | TOD | Read codes |  | 30294 | C10EL00 | Type 1 diabetes mellitus with persistent microalbuminuria |
| DM | TOD | Read codes |  | 65267 | C10F300 | Type 2 diabetes mellitus with multiple complications |
| DM | TOD | Read codes |  | 13104 | 2BBK.00 | O/E - no left diabetic retinopathy |
| DM | TOD | Read codes |  | 7069 | F420000 | Background diabetic retinopathy |
| DM | TOD | Read codes |  | 47650 | C10E300 | Type 1 diabetes mellitus with multiple complications |
| DM | TOD | Read codes |  | 99628 | Kyu0300 | [X]Glomerular disorders in diabetes mellitus |
| DM | TOD | Read codes |  | 35105 | C104100 | Diabetes mellitus, adult onset, with renal manifestation |
| DM | TOD | Read codes |  | 33254 | C105.00 | Diabetes mellitus with ophthalmic manifestation |
| DM | TOD | Read codes |  | 17095 | 2G5A.00 | O/E - Right diabetic foot at risk |
| DM | TOD | Read codes |  | 18056 | 2G5C.00 | Foot abnormality - diabetes related |
| DM | TOD | Read codes |  | 22967 | 2BBF.00 | Retinal abnormality - diabetes related |
| DM | TOD | Read codes |  | 41389 | C105100 | Diabetes mellitus, adult onset, + ophthalmic manifestation |
| DM | TOD | Read codes |  | 62146 | C109300 | Non-insulin-dependent diabetes mellitus with multiple comps |
| DM | TOD | Read codes |  | 65704 | C109412 | Type 2 diabetes mellitus with ulcer |
| DM | TOD | Read codes |  | 55075 | C109411 | Type II diabetes mellitus with ulcer |
| DM | TOD | Read codes |  | 41716 | C108C00 | Insulin dependent diabetes mellitus with polyneuropathy |
| DM | TOD | Read codes |  | 13099 | 2BBR.00 | O/E - right eye preproliferative diabetic retinopathy |
| DM | TOD | Read codes |  | 49146 | C108211 | Type I diabetes mellitus with neurological complications |
| DM | TOD | Read codes |  | 30477 | F420700 | High risk proliferative diabetic retinopathy |
| DM | TOD | Read codes |  | 107881 | K08yA11 | Clinical diabetic nephropathy |
| DM | TOD | Read codes |  | 111798 | C10FQ11 | Type II diabetes mellitus with exudative maculopathy |
| DM | TOD | Read codes |  | 100770 | C10EF12 | Insulin dependent diabetes mellitus with diabetic cataract |
| DM | TOD | Read codes |  | 2475 | C104.11 | Diabetic nephropathy |
| DM | TOD | Read codes |  | 49276 | C108100 | Insulin-dependent diabetes mellitus with ophthalmic comps |
| DM | TOD | Read codes |  | 24327 | M271000 | Ischaemic ulcer diabetic foot |
| DM | TOD | Read codes |  | 12640 | C10FC00 | Type 2 diabetes mellitus with nephropathy |
| DM | TOD | Read codes |  | 109760 | 1M8..00 | Diabetic peripheral neuropathic pain |
| DM | TOD | Read codes |  | 18230 | C108J12 | Type 1 diabetes mellitus with neuropathic arthropathy |
| DM | TOD | Read codes |  | 60208 | C108J11 | Type I diabetes mellitus with neuropathic arthropathy |
| DM | TOD | Read codes |  | 44779 | C109E12 | Type 2 diabetes mellitus with diabetic cataract |
| DM | TOD | Read codes |  | 41049 | C108712 | Type 1 diabetes mellitus with retinopathy |
| DM | TOD | Read codes |  | 38161 | C108711 | Type I diabetes mellitus with retinopathy |
| DM | TOD | Read codes |  | 103902 | C10FG11 | Type II diabetes mellitus with arthropathy |
| DM | TOD | Read codes |  | 54899 | C109F11 | Type II diabetes mellitus with peripheral angiopathy |
| DM | TOD | Read codes |  | 60699 | C109F12 | Type 2 diabetes mellitus with peripheral angiopathy |
| DM | TOD | Read codes |  | 53634 | R054200 | [D]Gangrene of toe in diabetic |
| DM | TOD | Read codes |  | 30323 | C10EK00 | Type 1 diabetes mellitus with persistent proteinuria |
| DM | TOD | Read codes |  | 18777 | C10F000 | Type 2 diabetes mellitus with renal complications |
| DM | TOD | Read codes |  | 10659 | F464000 | Diabetic cataract |
| DM | TOD | Read codes |  | 59365 | C109C00 | Non-insulin dependent diabetes mellitus with nephropathy |
| DM | TOD | Read codes |  | 12736 | C10F500 | Type 2 diabetes mellitus with gangrene |
| DM | TOD | Read codes |  | 93468 | C10EG00 | Type 1 diabetes mellitus with peripheral angiopathy |
| DM | TOD | Read codes |  | 2471 | K01x100 | Nephrotic syndrome in diabetes mellitus |
| DM | TOD | Read codes |  | 9835 | 2BBL.00 | O/E - diabetic maculopathy present both eyes |
| DM | TOD | Read codes |  | 66965 | C109H12 | Type 2 diabetes mellitus with neuropathic arthropathy |
| DM | TOD | Read codes |  | 47816 | C109H11 | Type II diabetes mellitus with neuropathic arthropathy |
| DM | TOD | Read codes |  | 69748 | C105000 | Diabetes mellitus, juvenile type, + ophthalmic manifestation |
| DM | TOD | Read codes |  | 67905 | C109211 | Type II diabetes mellitus with neurological complications |
| DM | TOD | Read codes |  | 45919 | C109212 | Type 2 diabetes mellitus with neurological complications |
| DM | TOD | Read codes |  | 27921 | 2G51000 | Foot abnormality - diabetes related |
| DM | TOD | Read codes |  | 43227 | C10F311 | Type II diabetes mellitus with multiple complications |
| DM | TOD | Read codes |  | 33807 | C107200 | Diabetes mellitus, adult with gangrene |
| DM | TOD | Read codes |  | 48078 | F372000 | Acute painful diabetic neuropathy |
| DM | TOD | Read codes |  | 102490 | 66Av.00 | Diabetic assessment of erectile dysfunction |
| DM | TOD | Read codes |  | 49655 | C10F611 | Type II diabetes mellitus with retinopathy |
| DM | TOD | Read codes |  | 13102 | 2BBW.00 | O/E - right eye diabetic maculopathy |
| DM | TOD | Read codes |  | 44982 | C10FE00 | Type 2 diabetes mellitus with diabetic cataract |
| DM | TOD | Read codes |  | 47321 | C10F100 | Type 2 diabetes mellitus with ophthalmic complications |
| DM | TOD | Read codes |  | 16502 | C104.00 | Diabetes mellitus with renal manifestation |
| DM | TOD | Read codes |  | 26664 | 2G5B.00 | O/E - Left diabetic foot at risk |
| DM | TOD | Read codes |  | 22573 | C106z00 | Diabetes mellitus NOS with neurological manifestation |
| DM | TOD | Read codes |  | 13108 | 2BBX.00 | O/E - left eye diabetic maculopathy |
| DM | TOD | Read codes |  | 64283 | C10zy00 | Other specified diabetes mellitus with unspecified comps |
| DM | TOD | Read codes |  | 68390 | C108512 | Type 1 diabetes mellitus with ulcer |
| DM | TOD | Read codes |  | 104323 | C10F511 | Type II diabetes mellitus with gangrene |
| DM | TOD | Read codes |  | 35785 | F372100 | Chronic painful diabetic neuropathy |
| DM | TOD | Read codes |  | 61829 | C108212 | Type 1 diabetes mellitus with neurological complications |
| DM | TOD | Read codes |  | 50813 | C109A11 | Type II diabetes mellitus with mononeuropathy |
| DM | TOD | Read codes |  | 102201 | C10FC11 | Type II diabetes mellitus with nephropathy |
| DM | TOD | Read codes |  | 105740 | 2G5d.00 | O/E - Left diabetic foot at increased risk |
| DM | TOD | Read codes |  | 113609 | C10FR11 | Type II diabetes mellitus with gastroparesis |
| DM | TOD | Read codes |  | 69278 | C109E00 | Non-insulin depend diabetes mellitus with diabetic cataract |
| DM | TOD | Read codes |  | 95343 | C10E711 | Type I diabetes mellitus with retinopathy |
| DM | TOD | Read codes |  | 93875 | C10E712 | Insulin dependent diabetes mellitus with retinopathy |
| DM | TOD | Read codes |  | 52303 | C109000 | Non-insulin-dependent diabetes mellitus with renal comps |
| DM | TOD | Read codes |  | 45467 | C109B00 | Non-insulin dependent diabetes mellitus with polyneuropathy |
| DM | TOD | Read codes |  | 3286 | F420100 | Proliferative diabetic retinopathy |
| DM | TOD | Read codes |  | 49554 | C10EF00 | Type 1 diabetes mellitus with diabetic cataract |
| DM | TOD | Read codes |  | 65463 | F420800 | High risk non proliferative diabetic retinopathy |
| DM | TOD | Read codes |  | 98704 | C10E512 | Insulin dependent diabetes mellitus with ulcer |
| DM | TOD | Read codes |  | 63371 | C10y100 | Diabetes mellitus, adult, + other specified manifestation |
| DM | TOD | Read codes |  | 34152 | G73y000 | Diabetic peripheral angiopathy |
| DM | TOD | Read codes |  | 108724 | C10EQ11 | Type I diabetes mellitus with gastroparesis |
| DM | TOD | Read codes |  | 97894 | C10EP11 | Type I diabetes mellitus with exudative maculopathy |
| DM | TOD | Read codes |  | 2986 | F420200 | Preproliferative diabetic retinopathy |
| DM | TOD | Read codes |  | 52104 | C108300 | Insulin dependent diabetes mellitus with multiple complicatn |
| DM | TOD | Read codes |  | 46290 | C108y00 | Other specified diabetes mellitus with multiple comps |
| DM | TOD | Read codes |  | 46150 | C109512 | Type 2 diabetes mellitus with gangrene |
| DM | TOD | Read codes |  | 18496 | C10F600 | Type 2 diabetes mellitus with retinopathy |
| DM | TOD | Read codes |  | 39420 | F381300 | Myasthenic syndrome due to diabetic amyotrophy |
| DM | TOD | Read codes |  | 17247 | F35z000 | Diabetic mononeuritis NOS |
| DM | TOD | Read codes |  | 35107 | C104z00 | Diabetes mellitus with nephropathy NOS |
| DM | TOD | Read codes |  | 100964 | C10F111 | Type II diabetes mellitus with ophthalmic complications |
| DM | TOD | Read codes |  | 61344 | C108011 | Type I diabetes mellitus with renal complications |
| DM | TOD | Read codes |  | 98071 | C10E112 | Insulin-dependent diabetes mellitus with ophthalmic comps |
| DM | TOD | Read codes |  | 101735 | C10E212 | Insulin-dependent diabetes mellitus with neurological comps |
| DM | TOD | Read codes |  | 31172 | 2G5K.00 | O/E - Left diabetic foot at high risk |
| DM | TOD | Read codes |  | 47328 | 2BBk.00 | O/E - right eye stable treated prolif diabetic retinopathy |
| DM | TOD | Read codes |  | 35116 | 2G5L.00 | O/E - Left diabetic foot - ulcerated |
| DM | TOD | Read codes |  | 13100 | 2BBJ.00 | O/E - no right diabetic retinopathy |
| DM | TOD | Read codes |  | 60796 | C10FL11 | Type II diabetes mellitus with persistent proteinuria |
| DM | TOD | Read codes |  | 49640 | 2G5W.00 | O/E - left chronic diabetic foot ulcer |
| DM | TOD | Read codes |  | 13097 | 2BBT.00 | O/E - right eye proliferative diabetic retinopathy |
| DM | TOD | Read codes |  | 13101 | 2BBV.00 | O/E - left eye proliferative diabetic retinopathy |
| DM | TOD | Read codes |  | 44033 | F345000 | Diabetic mononeuritis multiplex |
| DM | TOD | Read codes |  | 72320 | C109A00 | Non-insulin dependent diabetes mellitus with mononeuropathy |
| DM | TOD | Read codes |  | 109197 | C10FH11 | Type II diabetes mellitus with neuropathic arthropathy |
| DM | TOD | Read codes |  | 63690 | C10FR00 | Type 2 diabetes mellitus with gastroparesis |
| DM | TOD | Read codes |  | 110400 | C108F12 | Type 1 diabetes mellitus with diabetic cataract |
| DM | TOD | Read codes |  | 18209 | C109012 | Type 2 diabetes mellitus with renal complications |
| DM | TOD | Read codes |  | 50225 | C109011 | Type II diabetes mellitus with renal complications |
| DM | TOD | Read codes |  | 47409 | C109B11 | Type II diabetes mellitus with polyneuropathy |
| DM | TOD | Read codes |  | 109865 | C109B12 | Type 2 diabetes mellitus with polyneuropathy |
| DM | TOD | Read codes |  | 106360 | K27y700 | Erectile dysfunction due to diabetes mellitus |
| DM | TOD | Read codes |  | 110997 | C10y000 | Diabetes mellitus, juvenile, + other specified manifestation |
| DM | TOD | Read codes |  | 70821 | C10yz00 | Diabetes mellitus NOS with other specified manifestation |
| DM | TOD | Read codes |  | 11129 | 2BBQ.00 | O/E - left eye background diabetic retinopathy |
| DM | TOD | Read codes |  | 62107 | C109511 | Type II diabetes mellitus with gangrene |
| DM | TOD | Read codes |  | 12213 | 8BL2.00 | Patient on maximal tolerated therapy for diabetes |
| DM | TOD | Read codes |  | 91646 | C10F411 | Type II diabetes mellitus with ulcer |
| DM | TOD | Read codes |  | 2340 | F381311 | Diabetic amyotrophy |
| DM | TOD | Read codes |  | 18387 | C10E700 | Type 1 diabetes mellitus with retinopathy |
| DM | TOD | Read codes |  | 64449 | C108z00 | Unspecified diabetes mellitus with multiple complications |
| DM | TOD | Read codes |  | 11848 | C314.11 | Renal diabetes |
| DM | TOD | Read codes |  | 55239 | C10EQ00 | Type 1 diabetes mellitus with gastroparesis |
| DM | TOD | Read codes |  | 52630 | 2BBo.00 | O/E - sight threatening diabetic retinopathy |
| DM | TOD | Read codes |  | 18143 | C109G11 | Type II diabetes mellitus with arthropathy |
| DM | TOD | Read codes |  | 108007 | C108311 | Type I diabetes mellitus with multiple complications |
| DM | TOD | Read codes |  | 67853 | C106000 | Diabetes mellitus, juvenile, + neurological manifestation |
| DM | TOD | Read codes |  | 102740 | C108112 | Type 1 diabetes mellitus with ophthalmic complications |
| DM | TOD | Read codes |  | 27891 | N030100 | Diabetic Charcot arthropathy |
| DM | TOD | Read codes |  | 35385 | C10FH00 | Type 2 diabetes mellitus with neuropathic arthropathy |
| DM | TOD | Read codes |  | 101881 | 2BBr.00 | Impaired vision due to diabetic retinopathy |
| DM | TOD | Read codes |  | 104639 | C10FF11 | Type II diabetes mellitus with peripheral angiopathy |
| DM | TOD | Read codes |  | 49869 | C109G12 | Type 2 diabetes mellitus with arthropathy |
| DM | TOD | Read codes |  | 35316 | 2G5H.00 | O/E - Right diabetic foot - ulcerated |
| DM | TOD | Read codes |  | 31156 | 2G5J.00 | O/E - Left diabetic foot at moderate risk |
| DM | TOD | Read codes |  | 113495 | C109311 | Type II diabetes mellitus with multiple complications |
| DM |  | ICD-10 | E10 |  |  | Type 1 diabetes mellitus |
| DM |  | ICD-10 | E11 |  |  | Type 2 diabetes mellitus |
| DM |  | ICD-10 | E12 |  |  | Malnutrition-related diabetes mellitus |
| DM |  | ICD-10 | E13 |  |  | Other specified diabetes mellitus |
| DM |  | ICD-10 | E14 |  |  | Unspecified diabetes mellitues |
| DM |  | Read codes |  | 32193 | C11y000 | Steroid induced diabetes |
| DM |  | Read codes |  | 64668 | C10FJ11 | Insulin treated Type II diabetes mellitus |
| DM |  | Read codes |  | 106061 | C10FP11 | Type II diabetes mellitus with ketoacidotic coma |
| DM |  | Read codes |  | 101801 | 66At100 | Type II diabetic dietary review |
| DM |  | Read codes |  | 43951 | 66AK.00 | Diabetic - cooperative patient |
| DM |  | Read codes |  | 36633 | C109K00 | Hyperosmolar non-ketotic state in type 2 diabetes mellitus |
| DM |  | Read codes |  | 106738 | 9Oy0000 | Diabetic foot screening invitation |
| DM |  | Read codes |  | 52236 | C10A.00 | Malnutrition-related diabetes mellitus |
| DM |  | Read codes |  | 8836 | 66AR.00 | Diabetes management plan given |
| DM |  | Read codes |  | 28769 | 66AV.00 | Diabetic on insulin and oral treatment |
| DM |  | Read codes |  | 105937 | 8IEQ.00 | Referral to community diabetes specialist nurse declined |
| DM |  | Read codes |  | 107452 | 66o..00 | Further diabetic monitoring |
| DM |  | Read codes |  | 17262 | C109600 | Non-insulin-dependent diabetes mellitus with retinopathy |
| DM |  | Read codes |  | 110087 | 8OAH.00 | Provision of written information about diabetes and high BP |
| DM |  | Read codes |  | 95992 | C108A11 | Type I diabetes mellitus without complication |
| DM |  | Read codes |  | 49884 | 6761 | Diabetic pre-pregnancy counselling |
| DM |  | Read codes |  | 20900 | 9OLA.11 | Diabetes monitored |
| DM |  | Read codes |  | 6813 | 1434 | H/O: diabetes mellitus |
| DM |  | Read codes |  | 102767 | 67IJ100 | Pre-conception advice for diabetes mellitus |
| DM |  | Read codes |  | 711 | C10..00 | Diabetes mellitus |
| DM |  | Read codes |  | 61071 | C109D12 | Type 2 diabetes mellitus with hypoglycaemic coma |
| DM |  | Read codes |  | 10692 | C10EM00 | Type 1 diabetes mellitus with ketoacidosis |
| DM |  | Read codes |  | 93854 | 9OLM.00 | Diabetes structured education programme declined |
| DM |  | Read codes |  | 100422 | 8HgC.00 | Discharged from diabetes shared care programme |
| DM |  | Read codes |  | 97849 | C10E912 | Insulin dependent diabetes maturity onset |
| DM |  | Read codes |  | 102768 | 9NiZ.00 | Did not attend diabetes foot screening |
| DM |  | Read codes |  | 108005 | C109312 | Type 2 diabetes mellitus with multiple complications |
| DM |  | Read codes |  | 45491 | C10z.00 | Diabetes mellitus with unspecified complication |
| DM |  | Read codes |  | 13678 | ZL62600 | Referral to diabetic liaison nurse |
| DM |  | Read codes |  | 66145 | C10EN11 | Type I diabetes mellitus with ketoacidotic coma |
| DM |  | Read codes |  | 26605 | 9OLB.00 | Attended diabetes structured education programme |
| DM |  | Read codes |  | 61470 | 66Al.00 | Diabetic monitoring - higher risk albumin excretion |
| DM |  | Read codes |  | 47011 | 8Hj0.00 | Referral to diabetes structured education programme |
| DM |  | Read codes |  | 100533 | 66AQ000 | Unsuitable for diabetes year of care programme |
| DM |  | Read codes |  | 56448 | C108A00 | Insulin-dependent diabetes without complication |
| DM |  | Read codes |  | 105484 | 66Az.00 | High risk of diabetes mellitus annual review |
| DM |  | Read codes |  | 18662 | 8HBH.00 | Diabetic retinopathy 6 month review |
| DM |  | Read codes |  | 107739 | 679L211 | Advice about diabetes and driving |
| DM |  | Read codes |  | 24363 | 8A13.00 | Diabetic stabilisation |
| DM |  | Read codes |  | 101430 | 1252000 | Family history of diabetes mellitus type 1 |
| DM |  | Read codes |  | 19739 | 68A9.00 | Diabetic retinopathy screening offered |
| DM |  | Read codes |  | 65062 | C103z00 | Diabetes mellitus NOS with ketoacidotic coma |
| DM |  | Read codes |  | 106350 | 9m05.00 | Excluded from diabetic retinopathy screening as moved away |
| DM |  | Read codes |  | 42505 | C101z00 | Diabetes mellitus NOS with ketoacidosis |
| DM |  | Read codes |  | 12455 | C10E.11 | Type I diabetes mellitus |
| DM |  | Read codes |  | 98392 | C10C.12 | Maturity onset diabetes in youth type 1 |
| DM |  | Read codes |  | 46624 | C10C.11 | Maturity onset diabetes in youth |
| DM |  | Read codes |  | 1407 | C10FJ00 | Insulin treated Type 2 diabetes mellitus |
| DM |  | Read codes |  | 18747 | 8I6F.00 | Diabetic retinopathy screening not indicated |
| DM |  | Read codes |  | 107414 | 8I94.00 | Diabetes structured education programme not available |
| DM |  | Read codes |  | 108360 | C10P000 | Type I diabetes mellitus in remission |
| DM |  | Read codes |  | 35399 | C107.00 | Diabetes mellitus with peripheral circulatory disorder |
| DM |  | Read codes |  | 113115 | C10Q.00 | Maturity onset diabetes of the young type 5 |
| DM |  | Read codes |  | 95093 | 8I83.00 | Did not complete DESMOND diabetes structured educat program |
| DM |  | Read codes |  | 18311 | 68A7.00 | Diabetic retinopathy screening |
| DM |  | Read codes |  | 12675 | 66AQ.00 | Diabetes: shared care programme |
| DM |  | Read codes |  | 32739 | 9N0n.00 | Seen in community diabetes specialist clinic |
| DM |  | Read codes |  | 31240 | 9OL7.00 | Diabetes monitor.verbal invite |
| DM |  | Read codes |  | 16946 | 13L4.11 | Diabetic child |
| DM |  | Read codes |  | 55123 | 66AO.00 | Date diabetic treatment stopp. |
| DM |  | Read codes |  | 47370 | 8HLE.00 | Diabetology D.V. done |
| DM |  | Read codes |  | 102704 | 66At000 | Type I diabetic dietary review |
| DM |  | Read codes |  | 25041 | ZC2CA00 | Dietary advice for type II diabetes |
| DM |  | Read codes |  | 18278 | C109J00 | Insulin treated Type 2 diabetes mellitus |
| DM |  | Read codes |  | 43857 | C10M.00 | Lipoatrophic diabetes mellitus |
| DM |  | Read codes |  | 100033 | U60231E | [X] Adverse reaction to insulins and antidiabetic agents NOS |
| DM |  | Read codes |  | 65684 | U602311 | [X] Adverse reaction to insulins and antidiabetic agents |
| DM |  | Read codes |  | 106722 | 9Oy0300 | Diabetic foot screening invitation second letter |
| DM |  | Read codes |  | 99716 | C10EE12 | Insulin dependent diabetes mellitus with hypoglycaemic coma |
| DM |  | Read codes |  | 94956 | 8I84.00 | Did not complete XPERT diabetes structured education program |
| DM |  | Read codes |  | 107701 | C10FK11 | Hyperosmolar non-ketotic state in type II diabetes mellitus |
| DM |  | Read codes |  | 97809 | 8I82.00 | Did not complete DAFNE diabetes structured education program |
| DM |  | Read codes |  | 11551 | C10B.00 | Diabetes mellitus induced by steroids |
| DM |  | Read codes |  | 22487 | C10N.00 | Secondary diabetes mellitus |
| DM |  | Read codes |  | 758 | C10F.00 | Type 2 diabetes mellitus |
| DM |  | Read codes |  | 36695 | C10D.00 | Diabetes mellitus autosomal dominant type 2 |
| DM |  | Read codes |  | 51756 | C10FP00 | Type 2 diabetes mellitus with ketoacidotic coma |
| DM |  | Read codes |  | 64357 | C10zz00 | Diabetes mellitus NOS with unspecified complication |
| DM |  | Read codes |  | 12703 | 3881 | Education score - diabetes |
| DM |  | Read codes |  | 46577 | 66AX.00 | Diabetes: shared care in pregnancy - diabetol and obstet |
| DM |  | Read codes |  | 13067 | 66AZ.00 | Diabetic monitoring NOS |
| DM |  | Read codes |  | 95539 | C10FS00 | Maternally inherited diabetes mellitus |
| DM |  | Read codes |  | 16881 | ZV65312 | [V]Dietary counselling in diabetes mellitus |
| DM |  | Read codes |  | 22189 | ZV18011 | [V]Family history of diabetes mellitus (DM) |
| DM |  | Read codes |  | 53238 | 66AG.00 | Diabetic drug side effects |
| DM |  | Read codes |  | 95641 | 8Hj1.00 | Family/carer referral to diabetes structured education prog |
| DM |  | Read codes |  | 61557 | 8HKE.00 | Diabetology D.V. requested |
| DM |  | Read codes |  | 56268 | C109D11 | Type II diabetes mellitus with hypoglycaemic coma |
| DM |  | Read codes |  | 95813 | 9N1o.00 | Seen in multidisciplinary diabetic clinic |
| DM |  | Read codes |  | 62613 | C10EA11 | Type I diabetes mellitus without complication |
| DM |  | Read codes |  | 6125 | 66AS.00 | Diabetic annual review |
| DM |  | Read codes |  | 12307 | 66AU.00 | Diabetes care by hospital only |
| DM |  | Read codes |  | 50175 | 66AW.00 | Diabetic foot risk assessment |
| DM |  | Read codes |  | 101190 | 66AQ100 | Declined consent for diabetes year of care programme |
| DM |  | Read codes |  | 94955 | 9NiE.00 | Did not attend XPERT diabetes structured education programme |
| DM |  | Read codes |  | 28574 | 9h4..00 | Exception reporting: diabetes quality indicators |
| DM |  | Read codes |  | 108634 | 9NJy.00 | In-house diabetic foot screening |
| DM |  | Read codes |  | 13078 | 13AC.00 | Diabetic weight reducing diet |
| DM |  | Read codes |  | 47954 | C10F900 | Type 2 diabetes mellitus without complication |
| DM |  | Read codes |  | 98954 | 3883 | Diabetes treatment satisfaction questionnaire |
| DM |  | Read codes |  | 11348 | 9h42.00 | Excepted from diabetes quality indicators: Informed dissent |
| DM |  | Read codes |  | 38617 | C101y00 | Other specified diabetes mellitus with ketoacidosis |
| DM |  | Read codes |  | 57723 | 8HHy.00 | Referral to diabetic register |
| DM |  | Read codes |  | 110511 | 67W1.00 | Recommendation self-refer for diabetes structured education |
| DM |  | Read codes |  | 111106 | C108A12 | Type 1 diabetes mellitus without complication |
| DM |  | Read codes |  | 11041 | 9h41.00 | Excepted from diabetes qual indicators: Patient unsuitable |
| DM |  | Read codes |  | 104374 | 67D8.00 | Provision of diabetes clinical summary |
| DM |  | Read codes |  | 107824 | C10P100 | Type II diabetes mellitus in remission |
| DM |  | Read codes |  | 12247 | 8I6G.00 | Diabetic foot examination not indicated |
| DM |  | Read codes |  | 46850 | C108811 | Type I diabetes mellitus - poor control |
| DM |  | Read codes |  | 45914 | C108812 | Type 1 diabetes mellitus - poor control |
| DM |  | Read codes |  | 98723 | C10FD11 | Type II diabetes mellitus with hypoglycaemic coma |
| DM |  | Read codes |  | 107361 | 679L200 | Education about diabetes and driving |
| DM |  | Read codes |  | 85660 | 66An.00 | Diabetes type 1 review |
| DM |  | Read codes |  | 13069 | 66A8.00 | Has seen dietician - diabetes |
| DM |  | Read codes |  | 109806 | 8Hgd.00 | Discharge from secondary care diabetes service |
| DM |  | Read codes |  | 96823 | L180400 | Diabetes mellitus in pueperium - baby previously delivered |
| DM |  | Read codes |  | 52212 | Cyu2.00 | [X]Diabetes mellitus |
| DM |  | Read codes |  | 99822 | 38DK.00 | Finnish diabetes risk score |
| DM |  | Read codes |  | 57389 | 93C4.00 | Patient consent given for addition to diabetic register |
| DM |  | Read codes |  | 28873 | 66Ai.00 | Diabetic 6 month review |
| DM |  | Read codes |  | 101177 | 66At.00 | Diabetic dietary review |
| DM |  | Read codes |  | 106723 | 9Oy0200 | Diabetic foot screening invitation first letter |
| DM |  | Read codes |  | 50960 | L180500 | Pre-existing diabetes mellitus, insulin-dependent |
| DM |  | Read codes |  | 35288 | C10E800 | Type 1 diabetes mellitus - poor control |
| DM |  | Read codes |  | 32770 | 44V3.00 | Glucose tol. test diabetic |
| DM |  | Read codes |  | 34450 | C10FK00 | Hyperosmolar non-ketotic state in type 2 diabetes mellitus |
| DM |  | Read codes |  | 37648 | C109J11 | Insulin treated non-insulin dependent diabetes mellitus |
| DM |  | Read codes |  | 18264 | C109J12 | Insulin treated Type II diabetes mellitus |
| DM |  | Read codes |  | 40023 | C102000 | Diabetes mellitus, juvenile type, with hyperosmolar coma |
| DM |  | Read codes |  | 47341 | 8A12.00 | Diabetic crisis monitoring |
| DM |  | Read codes |  | 47144 | 2BBM.00 | O/E - diabetic maculopathy absent both eyes |
| DM |  | Read codes |  | 21472 | Q441.00 | Neonatal diabetes mellitus |
| DM |  | Read codes |  | 39070 | C10EE00 | Type 1 diabetes mellitus with hypoglycaemic coma |
| DM |  | Read codes |  | 109744 | 8OAK.00 | Provsn written information about diabetes & high cholesterol |
| DM |  | Read codes |  | 11930 | 9NN9.00 | Under care of diabetes specialist nurse |
| DM |  | Read codes |  | 47032 | 8CS0.00 | Diabetes care plan agreed |
| DM |  | Read codes |  | 11094 | 9NND.00 | Under care of diabetic foot screener |
| DM |  | Read codes |  | 9958 | 42W..00 | Hb. A1C - diabetic control |
| DM |  | Read codes |  | 11359 | L180.00 | Diabetes mellitus during pregnancy/childbirth/puerperium |
| DM |  | Read codes |  | 106332 | 9m00.00 | Eligible for diabetic retinopathy screening |
| DM |  | Read codes |  | 38129 | 9N0o.00 | Seen in community diabetic specialist nurse clinic |
| DM |  | Read codes |  | 38103 | 9N0m.00 | Seen in diabetic nurse consultant clinic |
| DM |  | Read codes |  | 12030 | 9OL6.00 | Diabetes monitoring 3rd letter |
| DM |  | Read codes |  | 35383 | 9OLD.00 | Diabetic patient unsuitable for digital retinal photography |
| DM |  | Read codes |  | 104453 | 66At011 | Type 1 diabetic dietary review |
| DM |  | Read codes |  | 31241 | 9OLZ.00 | Diabetes monitoring admin.NOS |
| DM |  | Read codes |  | 64384 | L180z00 | Diabetes mellitus in pregnancy/childbirth/puerperium NOS |
| DM |  | Read codes |  | 11471 | 8B3l.00 | Diabetes medication review |
| DM |  | Read codes |  | 13070 | 66A1.00 | Initial diabetic assessment |
| DM |  | Read codes |  | 93380 | C10N100 | Cystic fibrosis related diabetes mellitus |
| DM |  | Read codes |  | 95094 | 8I81.00 | Did not complete diabetes structured education programme |
| DM |  | Read codes |  | 67664 | ZRBa.00 | Education score - diabetes |
| DM |  | Read codes |  | 69676 | C10EA00 | Type 1 diabetes mellitus without complication |
| DM |  | Read codes |  | 15690 | C103.00 | Diabetes mellitus with ketoacidotic coma |
| DM |  | Read codes |  | 109520 | 9m03.00 | Eligibility permanently inactive for diabetic retinop screen |
| DM |  | Read codes |  | 105207 | 8HTE100 | Referral to community diabetes clinic |
| DM |  | Read codes |  | 107423 | 661N400 | Diabetes self-management plan review |
| DM |  | Read codes |  | 26604 | 66AY.00 | Diabetic diet - good compliance |
| DM |  | Read codes |  | 47377 | C105y00 | Other specified diabetes mellitus with ophthalmic complicatn |
| DM |  | Read codes |  | 13195 | 9OL5.00 | Diabetes monitoring 2nd letter |
| DM |  | Read codes |  | 100292 | Cyu2300 | [X]Unspecified diabetes mellitus with renal complications |
| DM |  | Read codes |  | 93491 | 9OLJ.00 | DAFNE diabetes structured education programme completed |
| DM |  | Read codes |  | 7777 | 8H4F.00 | Referral to diabetologist |
| DM |  | Read codes |  | 108890 | 679L300 | Diabetic foot care education |
| DM |  | Read codes |  | 49559 | L180300 | Diabetes mellitus during pregnancy - baby not yet delivered |
| DM |  | Read codes |  | 1038 | C100011 | Insulin dependent diabetes mellitus |
| DM |  | Read codes |  | 53392 | C10F911 | Type II diabetes mellitus without complication |
| DM |  | Read codes |  | 99719 | C10EA12 | Insulin-dependent diabetes without complication |
| DM |  | Read codes |  | 94383 | C10N000 | Secondary diabetes mellitus without complication |
| DM |  | Read codes |  | 28856 | 8CP2.00 | Transition of diabetes care options discussed |
| DM |  | Read codes |  | 41686 | Cyu2000 | [X]Other specified diabetes mellitus |
| DM |  | Read codes |  | 82474 | 8Hl4.00 | Referral to community diabetes specialist nurse |
| DM |  | Read codes |  | 109521 | 9m02.00 | Eligibility temporarily inactive for diabetic retinop screen |
| DM |  | Read codes |  | 107793 | 9Oy0400 | Diabetic foot screening invitation third letter |
| DM |  | Read codes |  | 13194 | 9OL4.00 | Diabetes monitoring 1st letter |
| DM |  | Read codes |  | 105741 | 2G5e.00 | O/E - Right diabetic foot at increased risk |
| DM |  | Read codes |  | 109133 | L180700 | Pre-existing malnutrition-related diabetes mellitus |
| DM |  | Read codes |  | 34541 | 8HVU.00 | Private referral to diabetologist |
| DM |  | Read codes |  | 95159 | 9NiD.00 | Did not attend DESMOND diabetes structured education program |
| DM |  | Read codes |  | 110611 | C10P111 | Type 2 diabetes mellitus in remission |
| DM |  | Read codes |  | 40682 | C10E900 | Type 1 diabetes mellitus maturity onset |
| DM |  | Read codes |  | 11677 | 8H7r.00 | Refer to diabetic foot screener |
| DM |  | Read codes |  | 6791 | C108800 | Insulin dependent diabetes mellitus - poor control |
| DM |  | Read codes |  | 46917 | C10FD00 | Type 2 diabetes mellitus with hypoglycaemic coma |
| DM |  | Read codes |  | 2379 | 9N1Q.00 | Seen in diabetic clinic |
| DM |  | Read codes |  | 18824 | 8I3W.00 | Diabetic foot examination declined |
| DM |  | Read codes |  | 61461 | 9M00.00 | Informed consent for diabetes national audit |
| DM |  | Read codes |  | 106679 | 8OA3.00 | Provision of written information about diabetes and driving |
| DM |  | Read codes |  | 16490 | 66AH.00 | Diabetic treatment changed |
| DM |  | Read codes |  | 95124 | 9Oy0.00 | Diabetes screening invitation |
| DM |  | Read codes |  | 3550 | 66A..00 | Diabetic monitoring |
| DM |  | Read codes |  | 30648 | 9N4p.00 | Did not attend diabetic retinopathy clinic |
| DM |  | Read codes |  | 43139 | C102100 | Diabetes mellitus, adult onset, with hyperosmolar coma |
| DM |  | Read codes |  | 44312 | 9M10.00 | Informed dissent for diabetes national audit |
| DM |  | Read codes |  | 101834 | 9h43.00 | Excepted from diabetes qual indicators: service unavailable |
| DM |  | Read codes |  | 93870 | 8Hj5.00 | Referral to XPERT diabetes structured education programme |
| DM |  | Read codes |  | 94699 | ZRB5.00 | Diabetes treatment satisfaction questionnaire |
| DM |  | Read codes |  | 8414 | 8CA4100 | Pt advised re diabetic diet |
| DM |  | Read codes |  | 13074 | 13B1.00 | Diabetic diet |
| DM |  | Read codes |  | 608 | 66A2.00 | Follow-up diabetic assessment |
| DM |  | Read codes |  | 1684 | 66A4.00 | Diabetic on oral treatment |
| DM |  | Read codes |  | 72702 | C10E812 | Insulin dependent diabetes mellitus - poor control |
| DM |  | Read codes |  | 105337 | C10E811 | Type I diabetes mellitus - poor control |
| DM |  | Read codes |  | 44993 | 46Z0.00 | Urine screening test for diabetes |
| DM |  | Read codes |  | 106328 | 9m07.00 | Excluded diabetc retinop screen as under care ophthalmolgist |
| DM |  | Read codes |  | 22130 | 9OL3.00 | Diabetes monitoring default |
| DM |  | Read codes |  | 13197 | 9OL1.00 | Attends diabetes monitoring |
| DM |  | Read codes |  | 47058 | 8Hg4.00 | Discharged from care of diabetes specialist nurse |
| DM |  | Read codes |  | 11977 | ZL62500 | Referral to diabetes nurse |
| DM |  | Read codes |  | 38078 | 66A9.00 | Understands diet - diabetes |
| DM |  | Read codes |  | 105784 | C109912 | Type 2 diabetes mellitus without complication |
| DM |  | Read codes |  | 109103 | C109911 | Type II diabetes mellitus without complication |
| DM |  | Read codes |  | 54600 | C10E412 | Unstable insulin dependent diabetes mellitus |
| DM |  | Read codes |  | 49949 | C10E411 | Unstable type I diabetes mellitus |
| DM |  | Read codes |  | 107560 | 67H9.00 | Education about lifestyle for risk of diabetes |
| DM |  | Read codes |  | 12507 | 9N2i.00 | Seen by diabetic liaison nurse |
| DM |  | Read codes |  | 101728 | 66As.00 | Diabetic on subcutaneous treatment |
| DM |  | Read codes |  | 102434 | 66Au.00 | Diabetic erectile dysfunction review |
| DM |  | Read codes |  | 66675 | C10A000 | Malnutrition-related diabetes mellitus with coma |
| DM |  | Read codes |  | 103935 | 1IA..00 | No evidence of diabetic nephropathy |
| DM |  | Read codes |  | 54419 | 918T.00 | Diabetes key contact |
| DM |  | Read codes |  | 91164 | ZRB4.11 | CSQ - Diabetes clinic satisfaction questionnaire |
| DM |  | Read codes |  | 107554 | 38Gv.00 | Diabetes UK diabetes risk score |
| DM |  | Read codes |  | 31141 | 9OL8.00 | Diabetes monitor.phone invite |
| DM |  | Read codes |  | 68714 | SL23.00 | Insulins and antidiabetic poisoning |
| DM |  | Read codes |  | 112237 | 8OAJ.00 | Provision written information abt diabetes & high HbA1c levl |
| DM |  | Read codes |  | 112365 | Lyu2900 | [X]Pre-existing diabetes mellitus, unspecified |
| DM |  | Read codes |  | 61021 | 68AB.00 | Diabetic digital retinopathy screening offered |
| DM |  | Read codes |  | 102620 | C10EL11 | Type I diabetes mellitus with persistent microalbuminuria |
| DM |  | Read codes |  | 94330 | 8H4e.00 | Referral to diabetes special interest general practitioner |
| DM |  | Read codes |  | 17886 | 66AM.00 | Diabetic - follow-up default |
| DM |  | Read codes |  | 22823 | 66Ab.00 | Diabetic foot examination |
| DM |  | Read codes |  | 100436 | 679L000 | Education in self management of diabetes |
| DM |  | Read codes |  | 111483 | 66o6.00 | Diabetic on insulin and glucagon-like peptide 1 |
| DM |  | Read codes |  | 110344 | 66o2.00 | Diabetic on non-insulin injectable medication |
| DM |  | Read codes |  | 106604 | C11y500 | Pre-diabetes |
| DM |  | Read codes |  | 58133 | ZLD7500 | Discharge by diabetic liaison nurse |
| DM |  | Read codes |  | 10642 | ZC2C800 | Dietary advice for diabetes mellitus |
| DM |  | Read codes |  | 106528 | C10FN11 | Type II diabetes mellitus with ketoacidosis |
| DM |  | Read codes |  | 26667 | 2G5I.00 | O/E - Left diabetic foot at low risk |
| DM |  | Read codes |  | 10192 | 1154200 | No significant family history of diabetes |
| DM |  | Read codes |  | 106218 | 9m0A.00 | Declined diabetic retinopathy screening |
| DM |  | Read codes |  | 12677 | ZV77100 | [V]Screening for diabetes mellitus |
| DM |  | Read codes |  | 94011 | 9OLG.00 | Attended XPERT diabetes structured education programme |
| DM |  | Read codes |  | 2664 | L180900 | Gestational diabetes mellitus |
| DM |  | Read codes |  | 52283 | C108200 | Insulin-dependent diabetes mellitus with neurological comps |
| DM |  | Read codes |  | 103743 | 8IE2.00 | Diabetes care plan declined |
| DM |  | Read codes |  | 93631 | 9OLL.00 | XPERT diabetes structured education programme completed |
| DM |  | Read codes |  | 22023 | 66AJz00 | Diabetic - poor control NOS |
| DM |  | Read codes |  | 31310 | C108900 | Insulin dependent diabetes maturity onset |
| DM |  | Read codes |  | 9145 | 9N4I.00 | DNA - Did not attend diabetic clinic |
| DM |  | Read codes |  | 4513 | C109.00 | Non-insulin dependent diabetes mellitus |
| DM |  | Read codes |  | 24490 | C100000 | Diabetes mellitus, juvenile type, no mention of complication |
| DM |  | Read codes |  | 108993 | 661M400 | Diabetes self-management plan agreed |
| DM |  | Read codes |  | 1682 | C101.00 | Diabetes mellitus with ketoacidosis |
| DM |  | Read codes |  | 107464 | 66AS000 | Diabetes Year of Care annual review |
| DM |  | Read codes |  | 103798 | 9b92000 | Diabetic medicine |
| DM |  | Read codes |  | 104287 | 8Hlc.00 | Referral to community diabetes service |
| DM |  | Read codes |  | 109878 | ZC2C911 | Diet advice for insulin-dependent diabetes |
| DM |  | Read codes |  | 9013 | 66AJ.11 | Unstable diabetes |
| DM |  | Read codes |  | 105481 | 14O8000 | High risk of diabetes mellitus |
| DM |  | Read codes |  | 68928 | TJ23.00 | Adverse reaction to insulins and antidiabetic agents |
| DM |  | Read codes |  | 50972 | C100z00 | Diabetes mellitus NOS with no mention of complication |
| DM |  | Read codes |  | 47315 | C10F711 | Type II diabetes mellitus - poor control |
| DM |  | Read codes |  | 61122 | C10H.00 | Diabetes mellitus induced by non-steroid drugs |
| DM |  | Read codes |  | 35321 | 8H3O.00 | Non-urgent diabetic admission |
| DM |  | Read codes |  | 24458 | C109711 | Type II diabetes mellitus - poor control |
| DM |  | Read codes |  | 45913 | C109712 | Type 2 diabetes mellitus - poor control |
| DM |  | Read codes |  | 17858 | C108.12 | Type 1 diabetes mellitus |
| DM |  | Read codes |  | 24423 | C108.13 | Type I diabetes mellitus |
| DM |  | Read codes |  | 18505 | C108.11 | IDDM-Insulin dependent diabetes mellitus |
| DM |  | Read codes |  | 11018 | 8HBG.00 | Diabetic retinopathy 12 month review |
| DM |  | Read codes |  | 58639 | 8I57.00 | Patient held diabetic record declined |
| DM |  | Read codes |  | 55431 | L180X00 | Pre-existing diabetes mellitus, unspecified |
| DM |  | Read codes |  | 68818 | ZRB5.11 | DTSQ - Diabetes treatment satisfaction questionnaire |
| DM |  | Read codes |  | 110409 | 679l.00 | Diabetic injection administration education |
| DM |  | Read codes |  | 107508 | 66AH200 | Conversion to insulin by diabetes specialist nurse |
| DM |  | Read codes |  | 2478 | 66AJ100 | Brittle diabetes |
| DM |  | Read codes |  | 97824 | ZRB6.11 | DWBQ - Diabetes wellbeing questionnaire |
| DM |  | Read codes |  | 54008 | C10EJ00 | Type 1 diabetes mellitus with neuropathic arthropathy |
| DM |  | Read codes |  | 44440 | C108E00 | Insulin dependent diabetes mellitus with hypoglycaemic coma |
| DM |  | Read codes |  | 8618 | ZLA2500 | Seen by diabetic liaison nurse |
| DM |  | Read codes |  | 106351 | 9m09.00 | Excluded from diabetic retinop screen as no longer diabetic |
| DM |  | Read codes |  | 12262 | 8I3X.00 | Diabetic retinopathy screening refused |
| DM |  | Read codes |  | 29979 | C109900 | Non-insulin-dependent diabetes mellitus without complication |
| DM |  | Read codes |  | 13071 | 66AI.00 | Diabetic - good control |
| DM |  | Read codes |  | 32359 | ZRbH.00 | Perceived control of insulin-dependent diabetes |
| DM |  | Read codes |  | 68843 | C103100 | Diabetes mellitus, adult onset, with ketoacidotic coma |
| DM |  | Read codes |  | 11599 | 7276 | Pan retinal photocoagulation for diabetes |
| DM |  | Read codes |  | 99277 | 9NiC.00 | Did not attend DAFNE diabetes structured education programme |
| DM |  | Read codes |  | 59288 | C103y00 | Other specified diabetes mellitus with coma |
| DM |  | Read codes |  | 98978 | 38DM.00 | Age, BP, clinical feat, duration, diabetes 2 stroke rsk scre |
| DM |  | Read codes |  | 21689 | 13AB.00 | Diabetic lipid lowering diet |
| DM |  | Read codes |  | 68546 | ZRB4.00 | Diabetes clinic satisfaction questionnaire |
| DM |  | Read codes |  | 25636 | 66Aa.00 | Diabetic diet - poor compliance |
| DM |  | Read codes |  | 109628 | C10P011 | Type 1 diabetes mellitus in remission |
| DM |  | Read codes |  | 7563 | 66A3.00 | Diabetic on diet only |
| DM |  | Read codes |  | 8842 | 66A5.00 | Diabetic on insulin |
| DM |  | Read codes |  | 106327 | 9m04.00 | Excluded from diabetic retinopathy screening |
| DM |  | Read codes |  | 106352 | 9m06.00 | Excluded from diabetic retinopathy screening as deceased |
| DM |  | Read codes |  | 26603 | 9OL2.00 | Refuses diabetes monitoring |
| DM |  | Read codes |  | 40837 | C10EN00 | Type 1 diabetes mellitus with ketoacidotic coma |
| DM |  | Read codes |  | 60107 | C108411 | Unstable type I diabetes mellitus |
| DM |  | Read codes |  | 93657 | 8Hj4.00 | Referral to DESMOND diabetes structured education programme |
| DM |  | Read codes |  | 53200 | C101000 | Diabetes mellitus, juvenile type, with ketoacidosis |
| DM |  | Read codes |  | 34639 | L180100 | Diabetes mellitus during pregnancy - baby delivered |
| DM |  | Read codes |  | 2378 | 66AJ.00 | Diabetic - poor control |
| DM |  | Read codes |  | 17869 | 66AL.00 | Diabetic-uncooperative patient |
| DM |  | Read codes |  | 13191 | 9OL..11 | Diabetes clinic administration |
| DM |  | Read codes |  | 14803 | C100100 | Diabetes mellitus, adult onset, no mention of complication |
| DM |  | Read codes |  | 12506 | 66AP.00 | Diabetes: practice programme |
| DM |  | Read codes |  | 106622 | 38Gj.00 | QDiabetes risk calculator |
| DM |  | Read codes |  | 43921 | C10E400 | Unstable type 1 diabetes mellitus |
| DM |  | Read codes |  | 61210 | TJ23z00 | Adverse reaction to insulins and antidiabetic agents NOS |
| DM |  | Read codes |  | 21482 | C102.00 | Diabetes mellitus with hyperosmolar coma |
| DM |  | Read codes |  | 38130 | ZRB6.00 | Diabetes wellbeing questionnaire |
| DM |  | Read codes |  | 32627 | C10FN00 | Type 2 diabetes mellitus with ketoacidosis |
| DM |  | Read codes |  | 12682 | 679R.00 | Patient offered diabetes structured education programme |
| DM |  | Read codes |  | 8306 | 8H7f.00 | Referral to diabetes nurse |
| DM |  | Read codes |  | 51261 | C10E.12 | Insulin dependent diabetes mellitus |
| DM |  | Read codes |  | 46521 | 9N2d.00 | Seen by diabetologist |
| DM |  | Read codes |  | 97281 | 9Nl4.00 | Seen by general practitioner special interest in diabetes |
| DM |  | Read codes |  | 63412 | 8CR2.00 | Diabetes clinical management plan |
| DM |  | Read codes |  | 38986 | C100.00 | Diabetes mellitus with no mention of complication |
| DM |  | Read codes |  | 102611 | 66At111 | Type 2 diabetic dietary review |
| DM |  | Read codes |  | 9974 | 9N1v.00 | Seen in diabetic eye clinic |
| DM |  | Read codes |  | 72345 | C102z00 | Diabetes mellitus NOS with hyperosmolar coma |
| DM |  | Read codes |  | 63017 | C108911 | Type I diabetes mellitus maturity onset |
| DM |  | Read codes |  | 97446 | C108912 | Type 1 diabetes mellitus maturity onset |
| DM |  | Read codes |  | 93727 | C10FE11 | Type II diabetes mellitus with diabetic cataract |
| DM |  | Read codes |  | 5884 | C109.11 | NIDDM - Non-insulin dependent diabetes mellitus |
| DM |  | Read codes |  | 18219 | C109.13 | Type II diabetes mellitus |
| DM |  | Read codes |  | 17859 | C109.12 | Type 2 diabetes mellitus |
| DM |  | Read codes |  | 19381 | 8HTk.00 | Referral to diabetic eye clinic |
| DM |  | Read codes |  | 109643 | 66o1.00 | Enquiry about diabetic erectile dysfunction declined |
| DM |  | Read codes |  | 110379 | 66o5.00 | Diabetic on oral treatment and glucagon-like peptide 1 |
| DM |  | Read codes |  | 33343 | C10y.00 | Diabetes mellitus with other specified manifestation |
| DM |  | Read codes |  | 113594 | 38QW.00 | Diabetes Distress Scale 2 item |
| DM |  | Read codes |  | 106778 | 9m0C.00 | Excluded frm diabetic retinopathy screen as terminal illness |
| DM |  | Read codes |  | 106445 | 9m0E.00 | Excluded from diabetic retinopathy screen physical disorder |
| DM |  | Read codes |  | 51066 | 9OLC.00 | Family/carer attended diabetes structured education prog |
| DM |  | Read codes |  | 13192 | 9OLA.00 | Diabetes monitor. check done |
| DM |  | Read codes |  | 43785 | C109D00 | Non-insulin dependent diabetes mellitus with hypoglyca coma |
| DM |  | Read codes |  | 69043 | ZC2C900 | Dietary advice for type I diabetes |
| DM |  | Read codes |  | 62209 | C10EM11 | Type I diabetes mellitus with ketoacidosis |
| DM |  | Read codes |  | 93390 | 9OLH.00 | Attended DAFNE diabetes structured education programme |
| DM |  | Read codes |  | 94186 | 9OLF.00 | Diabetes structured education programme completed |
| DM |  | Read codes |  | 94647 | 9Oy..00 | Diabetes screening administration |
| DM |  | Read codes |  | 8403 | C109700 | Non-insulin dependent diabetes mellitus - poor control |
| DM |  | Read codes |  | 1647 | C108.00 | Insulin dependent diabetes mellitus |
| DM |  | Read codes |  | 95636 | C10ER00 | Latent autoimmune diabetes mellitus in adult |
| DM |  | Read codes |  | 103597 | 1252111 | Family history of diabetes mellitus type II |
| DM |  | Read codes |  | 72333 | 8HME.00 | Listed for Diabetology admissn |
| DM |  | Read codes |  | 54856 | C101100 | Diabetes mellitus, adult onset, with ketoacidosis |
| DM |  | Read codes |  | 96506 | C10G000 | Secondary pancreatic diabetes mellitus without complication |
| DM |  | Read codes |  | 93704 | 8Hj3.00 | Referral to DAFNE diabetes structured education programme |
| DM |  | Read codes |  | 36669 | 66b1.00 | Diabetic monitoring not required |
| DM |  | Read codes |  | 42567 | C103000 | Diabetes mellitus, juvenile type, with ketoacidotic coma |
| DM |  | Read codes |  | 32619 | 66Af.00 | Patient diabetes education review |
| DM |  | Read codes |  | 106953 | 8IEa.00 | Referral to DAFNE diabetes structured educn prog declined |
| DM |  | Read codes |  | 106441 | 9m01.00 | Ineligible for diabetic retinopathy screening |
| DM |  | Read codes |  | 109222 | 67HA.00 | Lifestyle education for diabetes |
| DM |  | Read codes |  | 506 | C100112 | Non-insulin dependent diabetes mellitus |
| DM |  | Read codes |  | 69163 | 8HTi.00 | Referral to multidisciplinary diabetic clinic |
| DM |  | Read codes |  | 50937 | 8HTe.00 | Referral to diabetes preconception counselling clinic |
| DM |  | Read codes |  | 42729 | C108E11 | Type I diabetes mellitus with hypoglycaemic coma |
| DM |  | Read codes |  | 70766 | C108E12 | Type 1 diabetes mellitus with hypoglycaemic coma |
| DM |  | Read codes |  | 52237 | 9360 | Patient held diabetic record issued |
| DM |  | Read codes |  | 67635 | L180000 | Diabetes mellitus - unspec whether in pregnancy/puerperium |
| DM |  | Read codes |  | 97474 | C108412 | Unstable type 1 diabetes mellitus |
| DM |  | Read codes |  | 95994 | 66Aq.00 | Diabetic foot screen |
| DM |  | Read codes |  | 101456 | 8IAs.00 | Diabetic dietary review declined |
| DM |  | Read codes |  | 45250 | ZL22500 | Under care of diabetic liaison nurse |
| DM |  | Read codes |  | 95553 | 9NiA.00 | Did not attend diabetes structured education programme |
| DM |  | Read codes |  | 83532 | 66Ao.00 | Diabetes type 2 review |
| DM |  | Read codes |  | 12225 | 8H7C.00 | Refer, diabetic liaison nurse |
| DM |  | Read codes |  | 26108 | C10B000 | Steroid induced diabetes mellitus without complication |
| DM |  | Read codes |  | 54846 | 9OL9.00 | Diabetes monitoring deleted |
| DM |  | Read codes |  | 6430 | 9NM0.00 | Attending diabetes clinic |
| DM |  | Read codes |  | 26855 | C108400 | Unstable insulin dependent diabetes mellitus |
| DM |  | Read codes |  | 51697 | C10G.00 | Secondary pancreatic diabetes mellitus |
| DM |  | Read codes |  | 1549 | C10E.00 | Type 1 diabetes mellitus |
| DM |  | Read codes |  | 43453 | C10C.00 | Diabetes mellitus autosomal dominant |
| DM |  | Read codes |  | 108013 | ZC2CB00 | Dietary advice for gestational diabetes |
| DM |  | Read codes |  | 102316 | 1JL..00 | Suspected diabetes mellitus |
| DM |  | Read codes |  | 25627 | C10F700 | Type 2 diabetes mellitus - poor control |
| DM |  | Read codes |  | 64142 | 8Hl1.00 | Referral for diabetic retinopathy screening |
| DM |  | Read codes |  | 59991 | C10D.11 | Maturity onset diabetes in youth type 2 |
| DM |  | Read codes |  | 105585 | 8CMW700 | Diabetes clinical pathway |
| DM |  | Read codes |  | 106269 | 9m0..00 | Diabetic retinopathy screening administrative status |
| DM |  | Read codes |  | 111347 | 9Na5100 | Joint consultn pracse nurse & comm diabetes specialist nurse |
| DM |  | Read codes |  | 7059 | 8H2J.00 | Admit diabetic emergency |
| DM |  | Read codes |  | 93529 | 9OLK.00 | DESMOND diabetes structured education programme completed |
| DM |  | Read codes |  | 101455 | 9OLN.00 | Diabetes monitor invitation by SMS (short message service) |
| DM |  | Read codes |  | 20696 | 66AA.11 | Injection sites - diabetic |
| DM |  | Read codes |  | 9897 | 9OL..00 | Diabetes monitoring admin. |
| DM |  | Read codes |  | 34528 | 3882 | Diabetes well being questionnaire |
| DM |  | Read codes |  | 54601 | 9NN8.00 | Under care of diabetologist |
| DM |  | Read codes |  | 110393 | 13B1000 | Diabetic carbohydrate counting diet |
| DM |  | Read codes |  | 14889 | C100111 | Maturity onset diabetes |
| DM |  | Read codes |  | 10977 | 66Ac.00 | Diabetic peripheral neuropathy screening |
| DM |  | Read codes |  | 14050 | 42c..00 | HbA1 - diabetic control |
| DM |  | Read codes |  | 13196 | 66AD.00 | Fundoscopy - diabetic check |
| DM |  | Read codes |  | 22884 | C10F.11 | Type II diabetes mellitus |
| DM |  | Read codes |  | 96235 | C10E911 | Type I diabetes mellitus maturity onset |
| DM |  | Read codes |  | 14049 | 42WZ.00 | Hb. A1C - diabetic control NOS |
| DM |  | Read codes |  | 29041 | 66AN.00 | Date diabetic treatment start |
| DM |  | Read codes |  | 18066 | 8CE0.00 | Diabetic leaflet given |
| High cholesterol |  | Read codes |  | 107252 | C329.00 | Hypercholesterolaemia |
| High cholesterol |  | Read codes |  | 2493 | 44P3.00 | Serum cholesterol raised |
| High cholesterol |  | Read codes |  | 35720 | 44P4.00 | Serum cholesterol very high |
| High triglycerides |  | Read codes |  | 26941 | 44Q3.00 | Serum triglycerides raised |
| High triglycerides |  | Read codes |  | 12439 | C321000 | Hypertriglyceridaemia |
| Maximal therapy |  | Read codes |  | 12111 | 8BL1.00 | Patient on maximal tolerated lipid lowering therapy |
| PH or MD | FH | Read codes | E78.0 |  |  | Pure hypercholesterolaemia |
| PH or MD | FH | Read codes |  | 106558 | 1W2..00 | Probable familial hypercholesterolaemia |
| PH or MD | FH | Read codes |  | 3484 | C320.11 | Familial hypercholesterolaemia |
| PH or MD | FH | Read codes |  | 3386 | C320000 | Familial hypercholesterolaemia |
| PH or MD |  | Read codes | E78.2 |  |  | Mixed hyperlipidaemia |
| PH or MD |  | Read codes |  | 95952 | C328.00 | Dyslipidaemia |
| PH or MD |  | Read codes |  | 53091 | C320y00 | Other specified pure hypercholesterolaemia |
| PH or MD |  | Read codes |  | 102958 | C320600 | Polygenic hypercholesterolaemia |
| PH or MD |  | Read codes |  | 13254 | 1269 | Family history of familial hypercholesterolaemia |
| PH or MD |  | Read codes |  | 7447 | C320z00 | Pure hypercholesterolaemia NOS |
| PH or MD |  | Read codes |  | 339 | C320.00 | Pure hypercholesterolaemia |
| PH or MD |  | Read codes |  | 33694 | ZC2CJ00 | Dietary advice for hyperlipidaemia |
| PH or MD |  | Read codes |  | 50923 | U60C600 | [X]Antihyperlipidaem/antiarterioscl drg caus adv ef ther use |
| PH or MD |  | Read codes |  | 26019 | C320200 | Hyperlipidaemia, group A |
| PH or MD |  | Read codes |  | 16085 | 1442 | H/O: raised blood lipids |
| PH or MD |  | Read codes |  | 16937 | 8B28.00 | Lipid lowering therapy |
| PH or MD |  | Read codes |  | 46286 | U60C900 | [X]Lipid-lowering drug adverse reaction |
| PH or MD |  | Read codes |  | 104226 | 66X0.00 | Lipid disorder treatment started |
| PH or MD |  | Read codes |  | 105093 | 66X2.00 | Lipid disorder treatment changed |
| PH or MD |  | Read codes |  | 52992 | C322.11 | Fredrickson type IIb lipidaemia |
| PH or MD |  | Read codes |  | 59564 | C322.12 | Fredrickson type III lipidaemia |
| PH or MD |  | Read codes |  | 71747 | 8CR3.00 | Hyperlipidaemia clinical management plan |
| PH or MD |  | Read codes |  | 637 | C324.00 | Hyperlipidaemia NOS |
| PH or MD |  | Read codes |  | 15195 | 44OZ.00 | Serum lipids NOS |
| PH or MD |  | Read codes |  | 45020 | 8I2C.00 | Lipid lowering therapy contraindicated |
| PH or MD |  | Read codes |  | 5791 | C322.00 | Mixed hyperlipidaemia |
| PH or MD |  | Read codes |  | 55855 | C320.12 | Fredrickson type IIa lipidaemia |
| PH or MD |  | Read codes |  | 14781 | 44O4.00 | Serum lipids high |
| PH or MD |  | Read codes |  | 102390 | C322000 | Familial combined hyperlipidaemia |
| PH or MD |  | Read codes |  | 54499 | C321.11 | Fredrickson type IV lipidaemia |
| PH or MD |  | Read codes |  | 13657 | 8HT1.00 | Referral to lipid clinic |
| PH or MD |  | Read codes |  | 97166 | 9Oc0.00 | Attends lipid disorder monitoring |
| PH or MD |  | Read codes |  | 34543 | 8H6E.00 | Referral to GP - lipid management |
| Test Chol |  | Read codes |  | 18040 | 44OE.00 | Plasma total cholesterol level |
| Test cholesterol |  | Read codes |  | 14136 | 4I3O.00 | Fluid sample cholesterol level |
| Test cholesterol |  | Read codes |  | 12 | 44P..00 | Serum cholesterol |
| Test cholesterol |  | Read codes |  | 44 | 44P5.00 | Serum HDL cholesterol level |
| Test cholesterol |  | Read codes |  | 13733 | 44PJ.00 | Serum total cholesterol level |
| Test cholesterol |  | Read codes |  | 12821 | 44PK.00 | Serum fasting total cholesterol |
| Test cholesterol |  | Read codes |  | 13762 | 44d3.00 | Plasma fasting HDL cholesterol level |
| Test cholesterol |  | Read codes |  | 18147 | 44PH.00 | Total cholesterol measurement |
| Test cholesterol |  | Read codes |  | 26902 | 44PZ.00 | Serum cholesterol NOS |
| Test HDL-C |  | Read codes |  | 34548 | 44dA.00 | Plasma HDL cholesterol level |
| Test HDL-C |  | Read codes |  | 26915 | 44d2.00 | Plasma random HDL cholesterol level |
| Test HDL-C |  | Read codes |  | 13761 | 44PC.00 | Serum random HDL cholesterol level |
| Test LDL-C |  | Read codes |  | 46224 | 44PE.00 | Serum random LDL-C level |
| Test LDL-C |  | Read codes |  | 29699 | 44d5.00 | Plasma fasting LDL-C level |
| Test LDL-C |  | Read codes |  | 19764 | 44dB.00 | Plasma LDL-C level |
| Test LDL-C |  | Read codes |  | 13766 | 44PI.00 | Calculated LDL-C level |
| Test LDL-C |  | Read codes |  | 13765 | 44PD.00 | Serum fasting LDL-C level |
| Test LDL-C |  | Read codes |  | 33304 | 44d4.00 | Plasma random LDL-C level |
| Test LDL-C |  | Read codes |  | 64564 | 44R5.00 | Lipoprotein electrophoresis – VLDL |
| Test LDL-C |  | Read codes |  | 65 | 44P6.00 | Serum LDL-C level |
| Test triglyceride |  | Read codes |  | 41074 | 44Q5.00 | Serum random triglyceride level |
| Test triglyceride |  | Read codes |  | 37 | 44Q..00 | Serum triglycerides |
| Test triglyceride |  | Read codes |  | 63627 | 44e0.00 | Plasma random triglyceride level |
| Test triglyceride |  | Read codes |  | 30870 | 44QZ.00 | Serum triglycerides NOS |
| Test triglyceride |  | Read codes |  | 38273 | 4QA1.00 | Triglyceride level |
| Test triglyceride |  | Read codes |  | 13808 | 44Q4.00 | Serum fasting triglyceride level |
| Test triglyceride |  | Read codes |  | 17416 | 44e..00 | Plasma triglyceride level |
| Test triglyceride |  | Read codes |  | 13809 | 44e1.00 | Plasma fasting triglyceride level |
| Test VLDL |  | Read codes |  | 66037 | 44OB.00 | Serum VLDL triglyceride level |
| Test VLDL |  | Read codes |  | 13834 | 44O8.00 | Plasma VLDL triglyceride level |
| Test VLDL |  | Read codes |  | 13816 | 44P7.00 | Serum VLDL-C level |

BP, blood pressure; CABG, coronary artery bypass graft; CSQ, clinic satisfaction questionnaire; CVA, cerebrovascular accident; CVD, cardiovascular disease; DAFNE, Dose Adjustment for Normal Eating; DESMOND, Diabetes, Education and Self-Management for Ongoing and Newly Diagnosed; DM, diabetes mellitus; DNA, did not attend; DTSQ, diabetes treatment satisfaction questionnaire; D.V., daily value; DWBQ, diabetes wellbeing questionnaire; ECG, electrocardiography; FH, familial hypercholesterolemia; GP, general practitioner; HbA1c, glycated hemoglobin; HDL, high-density lipoprotein; HDL-C, high-density lipoprotein cholesterol; HELLP, hemolysis, elevated liver enzymes and low platelets; H/O, history of; ICD-10, International Classification of Diseases, revision 10; IDDM, insulin-dependent diabetes mellitus; LDL-C, high-density lipoprotein cholesterol; MD, mixed dyslipidemia; MI, myocardial infarction; NEC, not elsewhere classified; NIDDM, non-insulin-dependent diabetes mellitus; NOS, not otherwise specified; PAD, peripheral artery disease; PCR, polymerase chain reaction; PH, primary hypercholesterolemia; RNA, ribonucleic acid; SMS, short message service; TIA, transient ischemic attack; TOD, target organ damage; VLDL, very low-density lipoprotein; VLDL-C, very low-density lipoprotein cholesterol.

**Supplementary table C** Procedure codes2

| **Classification** | **Subclassification** | **Coding library** | **Code** | **Definition** |
| --- | --- | --- | --- | --- |
| CVD | Revascularization | OPCS-4 | K40 | Saphenous vein graft replacement of coronary artery |
| CVD | Revascularization | OPCS-4 | K41 | Other autograft replacement of coronary artery |
| CVD | Revascularization | OPCS-4 | K42 | Allograft replacement of coronary artery |
| CVD | Revascularization | OPCS-4 | K43 | Prosthetic replacement of coronary artery |
| CVD | Revascularization | OPCS-4 | K44 | Other replacement of coronary artery |
| CVD | Revascularization | OPCS-4 | K45 | Connection of thoracic artery to coronary artery |
| CVD | Revascularization | OPCS-4 | K46 | Other bypass of coronary artery |
| CVD | Revascularization | OPCS-4 | K47 | Repair of coronary artery |
| CVD | Revascularization | OPCS-4 | K48 | Other open operations on coronary artery |
| CVD | Revascularization | OPCS-4 | K49 | Transluminal balloon angioplasty of coronary artery |
| CVD | Revascularization | OPCS-4 | K50 | Other therapeutic transluminal operations on coronary artery |
| CVD | Revascularization | OPCS-4 | K75 | Percutaneous transluminal balloon angioplasty and insertion of stent into coronary artery |

CVD, cardiovascular disease; OPCS-4, Office of Population Censuses and Surveys Classification of Interventions and Procedures, version 4.

**Supplementary table D** Drug codes2

| **Classification** | **Statin type** | **Combo** | **Prod code** | **Dmd code** | **Gemscript code** | **Product name** | **Drug substance name** | **Substance strength** | **Formulation** | **Route of administration** | **BNF code** | **BNF header** | |
| --- | --- | --- | --- | --- | --- | --- | --- | --- | --- | --- | --- | --- | --- |
| Bile Acid Seq |  |  | 24084 | 3266211000001100 | 64593020 | Colestyramine 4g oral powder sachets sugar free (PLIVA Pharma Ltd) | Colestyramine anhydrous | 4gram | Powder | Oral | 01090200/02120100 | | Bile Acid Sequestrants/Bile Acid Sequestrants (Lipid-Regulating Drugs) |
| Bile Acid Seq |  |  | 6365 | 4083011000001100 | 68876020 | Colestid 5g granules sachets plain (Pfizer Ltd) | Colestipol hydrochloride | 5gram | Granules | Oral | 2120100 | | Bile Acid Sequestrants (Lipid-Regulating Drugs) |
| Bile Acid Seq |  |  | 34201 | 3260311000001100 | 63524020 | Colestyramine 4g oral powder sachets sugar free (Actavis UK Ltd) | Colestyramine anhydrous | 4gram | Powder | Oral | 01090200/02120100 | | Bile Acid Sequestrants/Bile Acid Sequestrants (Lipid-Regulating Drugs) |
| Bile Acid Seq |  |  | 1212 | 4090511000001100 | 68873020 | Colestipol 5g granules sachets sugar free | Colestipol hydrochloride | 5gram | Granules | Oral | 2120100 | | Bile Acid Sequestrants (Lipid-Regulating Drugs) |
| Bile Acid Seq |  |  | 18081 | 4083711000001100 | 87334020 | Colestid Orange 5g granules sachets (Pfizer Ltd) | Colestipol hydrochloride | 5gram | Granules | Oral | 2120100 | | Bile Acid Sequestrants (Lipid-Regulating Drugs) |
| Bile Acid Seq |  |  | 11785 | 3336411000001100 | 72766020 | Colestyramine 4g oral powder sachets sugar free | Colestyramine anhydrous | 4gram | Powder | Oral | 01090200/02120100 | | Bile Acid Sequestrants/Bile Acid Sequestrants (Lipid-Regulating Drugs) |
| Bile Acid Seq |  |  | 61087 | 17426411000001100 | 11244020 | Questran Light 4g oral powder sachets (Mawdsley-Brooks & Company Ltd) | Colestyramine anhydrous | 4gram | Powder | Oral | 01090200/02120100 | | Bile Acid Sequestrants/Bile Acid Sequestrants (Lipid-Regulating Drugs) |
| Bile Acid Seq |  |  | 644 | 319948000 | 61299020 | Colestyramine 4g oral powder sachets | Colestyramine anhydrous | 4gram | Powder | Oral | 01090200/02120100 | | Bile Acid Sequestrants/Bile Acid Sequestrants (Lipid-Regulating Drugs) |
| Bile Acid Seq |  |  | 60101 | 11879511000001100 | 74616020 | Colestyramine 4g oral powder sachets sugar free (Teva UK Ltd) | Colestyramine anhydrous | 4gram | Powder | Oral | 01090200/02120100 | | Bile Acid Sequestrants/Bile Acid Sequestrants (Lipid-Regulating Drugs) |
| Bile Acid Seq |  |  | 1764 | 3263311000001100 | 72763020 | Questran Light 4g oral powder sachets (Bristol-Myers Squibb Pharmaceuticals Ltd) | Colestyramine anhydrous | 4gram | Powder | Oral | 01090200/02120100 | | Bile Acid Sequestrants/Bile Acid Sequestrants (Lipid-Regulating Drugs) |
| Bile Acid Seq |  |  | 75806 | 3258211000001100 | 71237020 | Colestyramine 4g oral powder sachets sugar free (A A H Pharmaceuticals Ltd) | Colestyramine anhydrous | 4gram | Powder | Oral | 01090200/02120100 | | Bile Acid Sequestrants/Bile Acid Sequestrants (Lipid-Regulating Drugs) |
| Bile Acid Seq |  |  | 68386 | 31566711000001100 | 61342021 | Colestyramine 4g oral powder sachets (J M McGill Ltd) | Colestyramine anhydrous | 4gram | Powder | Oral | 01090200/02120100 | | Bile Acid Sequestrants/Bile Acid Sequestrants (Lipid-Regulating Drugs) |
| Bile Acid Seq |  |  | 19938 | 158115001000027000 | 69074020 | Colestipol with aspartame granules | Colestipol hydrochloride |  | Granules | Oral | 2120100 | | Bile Acid Sequestrants (Lipid-Regulating Drugs) |
| Bile Acid Seq |  |  | 37266 | 376119006 | 94247020 | Colesevelam 625mg tablets | Colesevelam hydrochloride | 625mg | Tablet | Oral | 1090200 | | Bile Acid Sequestrants |
| Bile Acid Seq |  |  | 72988 | 211035001000027000 | 79618020 | Cholemin 4g/sachet Sachets (Berk Pharmaceuticals Ltd) | Colestyramine anhydrous | 4gram | Powder | Oral | 01090200/02120100 | | Bile Acid Sequestrants/Bile Acid Sequestrants (Lipid-Regulating Drugs) |
| Bile Acid Seq |  |  | 1716 | 3257311000001100 | 51328020 | Questran 4g oral powder sachets (Bristol-Myers Squibb Pharmaceuticals Ltd) | Colestyramine anhydrous | 4gram | Powder | Oral | 01090200/02120100 | | Bile Acid Sequestrants/Bile Acid Sequestrants (Lipid-Regulating Drugs) |
| Bile Acid Seq |  |  | 5564 | 157065001000027000 | 68877020 | Colestid Orange sachets (Pharmacia Ltd) | Colestipol Hydrochloride |  | Orange Sachets | Oral | 2120100 | | Bile Acid Sequestrants (Lipid-Regulating Drugs) |
| Bile Acid Seq |  |  | 73910 | 374076007 | 9813020 | Colestipol 1g tablets | Colestipol hydrochloride | 1gram | Tablet | Oral | 2120100 | | Bile Acid Sequestrants (Lipid-Regulating Drugs) |
| Bile Acid Seq |  |  | 37953 | 12556311000001100 | 94249020 | Cholestagel 625mg tablets (Sanofi) | Colesevelam hydrochloride | 625mg | Tablet | Oral | 1090200 | | Bile Acid Sequestrants |
| Bile Acid Seq |  |  | 32110 | 73495001000027100 | 57384020 | Colestyramine 4g Sachets (Dominion Pharma) | Colestyramine anhydrous | 4gram | Powder | Oral | 01090200/02120100 | | Bile Acid Sequestrants/Bile Acid Sequestrants (Lipid-Regulating Drugs) |
| Bile Acid Seq |  |  | 6155 | 215575001000027000 | 81028020 | Colestyramine with aspartame 4g sugar free powder | Colestyramine Anhydrous | 4g | Powder Sugar-Free | Oral | 01090200/02120100 | | Bile Acid Sequestrants/Bile Acid Sequestrants (Lipid-Regulating Drugs) |
| Ezetimibe |  |  | 6120 | 4495611000001100 | 76976020 | Ezetrol 10mg tablets (Merck Sharp & Dohme Ltd) | Ezetimibe | 10mg | Tablet | Oral | 2120000 | | Lipid-Regulating Drugs |
| Ezetimibe |  |  | 653 | 408060004 | 76979020 | Ezetimibe 10mg tablets | Ezetimibe | 10mg | Tablet | Oral | 2120000 | | Lipid-Regulating Drugs |
| Ezetimibe |  |  | 74161 | 35431211000001100 | 80577021 | Ezetimibe 10mg tablets (Mylan) | Ezetimibe | 10mg | Tablet | Oral | 2120000 | | Lipid-Regulating Drugs |
| Fibrates |  |  | 4062 | 389111000001109 | 58845020 | Lopid 600mg tablets (Pfizer Ltd) | Gemfibrozil | 600mg | Tablet | Oral | 2120300 | | Fibrates |
| Fibrates |  |  | 73491 | 10639311000001100 | 73243020 | Fenofibrate micronised 267mg capsules (A A H Pharmaceuticals Ltd) | Fenofibrate micronised | 267mg | Capsule | Oral | 2120300 | | Fibrates |
| Fibrates |  |  | 3089 | 320018007 | 57107020 | Ciprofibrate 100mg tablets | Ciprofibrate | 100mg | Tablet | Oral | 2120300 | | Fibrates |
| Fibrates |  |  | 23153 | 68411000001107 | 64747020 | Liparol 400 XL tablets (Ashbourne Pharmaceuticals Ltd) | Bezafibrate | 400mg | Modified-release tablet | Oral | 2120300 | | Fibrates |
| Fibrates |  |  | 41396 | 9157011000001100 | 63947020 | Fenofibrate micronised 200mg capsules (A A H Pharmaceuticals Ltd) | Fenofibrate micronised | 200mg | Capsule | Oral | 2120300 | | Fibrates |
| Fibrates |  |  | 3318 | 319966005 | 62908020 | Gemfibrozil 300mg capsules | Gemfibrozil | 300mg | Capsule | Oral | 2120300 | | Fibrates |
| Fibrates |  |  | 9716 | 2950911000001100 | 68384020 | Supralip 160mg tablets (Mylan) | Fenofibrate micronised | 160mg | Tablet | Oral | 2120300 | | Fibrates |
| Fibrates |  |  | 3159 | 9843611000001100 | 70568020 | Fenofibrate 200mg capsules | Fenofibrate | 200mg | Capsule | Oral | 2120300 | | Fibrates |
| Fibrates |  |  | 2435 | 168605001000027000 | 70563020 | Lipantil 100mg Capsule (Fournier Pharmaceuticals Ltd) | Fenofibrate | 100mg | Capsule | Oral | 2120300 | | Fibrates |
| Fibrates |  |  | 1214 | 66525001000027100 | 56378020 | Bezalip 400mg Tablet (Roche Products Ltd) | Bezafibrate | 400mg | Modified-release tablet | Oral | 2120300 | | Fibrates |
| Fibrates |  |  | 5216 | 32685001000027100 | 52058020 | Bezalip mono 400mg Modified-release tablet (Roche Products Ltd) | Bezafibrate | 400mg | Modified-release tablet | Oral | 2120300 | | Fibrates |
| Fibrates |  |  | 59002 | 13585711000001100 | 2409020 | Bezafibrate 400mg modified-release tablets (DE Pharmaceuticals) | Bezafibrate | 400mg | Modified-release tablet | Oral | 2120300 | | Fibrates |
| Fibrates |  |  | 63737 | 15084211000001100 | 2462020 | Fenofibrate micronised 267mg capsules (Sigma Pharmaceuticals Plc) | Fenofibrate micronised | 267mg | Capsule | Oral | 2120300 | | Fibrates |
| Fibrates |  |  | 66425 | 29558611000001100 | 49069021 | Bezafibrate 400mg modified-release tablets (A A H Pharmaceuticals Ltd) | Bezafibrate | 400mg | Modified-release tablet | Oral | 2120300 | | Fibrates |
| Fibrates |  |  | 602 | 319941006 | 64208020 | Bezafibrate 400mg modified-release tablets | Bezafibrate | 400mg | Modified-release tablet | Oral | 2120300 | | Fibrates |
| Fibrates |  |  | 2215 | 383511000001102 | 58844020 | Lopid 300mg capsules (Pfizer Ltd) | Gemfibrozil | 300mg | Capsule | Oral | 2120300 | | Fibrates |
| Fibrates |  |  | 65572 | 20411211000001100 | 41334020 | Fenofibrate micronised 160mg tablets (Genus Pharmaceuticals Ltd) | Fenofibrate micronised | 160mg | Tablet | Oral | 2120300 | | Fibrates |
| Fibrates |  |  | 4928 | 2952311000001100 | 86195020 | Lipantil Micro 200 capsules (Mylan) | Fenofibrate micronised | 200mg | Capsule | Oral | 2120300 | | Fibrates |
| Fibrates |  |  | 4920 | 319988005 | 86192020 | Fenofibrate micronised 200mg capsules | Fenofibrate micronised | 200mg | Capsule | Oral | 2120300 | | Fibrates |
| Fibrates |  |  | 57219 | 4579711000001100 | 68534020 | Fenofibrate micronised 200mg capsules (Sandoz Ltd) | Fenofibrate micronised | 200mg | Capsule | Oral | 2120300 | | Fibrates |
| Fibrates |  |  | 184 | 319940007 | 64207020 | Bezafibrate 200mg tablets | Bezafibrate | 200mg | Tablet | Oral | 2120300 | | Fibrates |
| Fibrates |  |  | 9639 | 319994002 | 76495020 | Fenofibrate micronised 160mg tablets | Fenofibrate micronised | 160mg | Tablet | Oral | 2120300 | | Fibrates |
| Fibrates |  |  | 74009 | 5524911000001100 | 2406020 | Bezalip Mono 400mg modified-release tablets (Dowelhurst Ltd) | Bezafibrate | 400mg | Modified-release tablet | Oral | 2120300 | | Fibrates |
| Fibrates |  |  | 31221 | 51311000001102 | 61400020 | Bezafibrate 200mg tablets (Mylan) | Bezafibrate | 200mg | Tablet | Oral | 2120300 | | Fibrates |
| Fibrates |  |  | 67329 | 13922411000001100 | 2461020 | Lipantil Micro 267 capsules (DE Pharmaceuticals) | Fenofibrate micronised | 267mg | Capsule | Oral | 2120300 | | Fibrates |
| Fibrates |  |  | 57489 | 16034411000001100 | 76919020 | Ciprofibrate 100mg tablets (Zentiva) | Ciprofibrate | 100mg | Tablet | Oral | 2120300 | | Fibrates |
| Fibrates |  |  | 9491 | 319990006 | 86190020 | Fenofibrate micronised 67mg capsules | Fenofibrate micronised | 67mg | Capsule | Oral | 2120300 | | Fibrates |
| Fibrates |  |  | 8706 | 457811000001109 | 56989020 | Modalim 100mg tablets (Sanofi) | Ciprofibrate | 100mg | Tablet | Oral | 2120300 | | Fibrates |
| Fibrates |  |  | 47935 | 204355001000027000 | 77455020 | Fenofibrate 200mg Capsule (Teva UK Ltd) | Fenofibrate micronised | 200mg | Capsule | Oral | 2120300 | | Fibrates |
| Fibrates |  |  | 67157 | 17905511000001100 | 2449020 | Fenofibrate micronised 200mg capsules (Phoenix Healthcare Distribution Ltd) | Fenofibrate micronised | 200mg | Capsule | Oral | 2120300 | | Fibrates |
| Fibrates |  |  | 64503 | 5341511000001100 | 2405020 | Bezalip Mono 400mg modified-release tablets (Waymade Healthcare Plc) | Bezafibrate | 400mg | Modified-release tablet | Oral | 2120300 | | Fibrates |
| Fibrates |  |  | 39576 | 130711000001102 | 96389020 | Bezalip 200mg tablets (Teva UK Ltd) | Bezafibrate | 200mg | Tablet | Oral | 2120300 | | Fibrates |
| Fibrates |  |  | 8082 | 319964008 | 62909020 | Gemfibrozil 600mg tablets | Gemfibrozil | 600mg | Tablet | Oral | 2120300 | | Fibrates |
| Fibrates |  |  | 1217 | 168615001000027000 | 70564020 | Lipantil micro 200 200mg Capsule (Fournier Pharmaceuticals Ltd) | Fenofibrate micronised | 200mg | Capsule | Oral | 2120300 | | Fibrates |
| Fibrates |  |  | 66087 | 16556711000001100 | 2568020 | Modalim 100mg tablets (Mawdsley-Brooks & Company Ltd) | Ciprofibrate | 100mg | Tablet | Oral | 2120300 | | Fibrates |
| Fibrates |  |  | 58635 | 13836411000001100 | 2410020 | Bezalip Mono 400mg modified-release tablets (DE Pharmaceuticals) | Bezafibrate | 400mg | Modified-release tablet | Oral | 2120300 | | Fibrates |
| Fibrates |  |  | 66564 | 23646011000001100 | 21351021 | Bezafibrate 400mg modified-release tablets (Phoenix Healthcare Distribution Ltd) | Bezafibrate | 400mg | Modified-release tablet | Oral | 2120300 | | Fibrates |
| Fibrates |  |  | 7540 | 2957911000001100 | 86196020 | Lipantil Micro 267 capsules (Mylan) | Fenofibrate micronised | 267mg | Capsule | Oral | 2120300 | | Fibrates |
| Fibrates |  |  | 1215 | 168635001000027000 | 70567020 | Fenofibrate 100mg Capsule | Fenofibrate | 100mg | Capsule | Oral | 2120300 | | Fibrates |
| Fibrates |  |  | 34277 | 646111000001100 | 56740020 | Gemfibrozil 600mg tablets (Teva UK Ltd) | Gemfibrozil | 600mg | Tablet | Oral | 2120300 | | Fibrates |
| Fibrates |  |  | 64984 | 23916211000001100 | 21748021 | Fenofibrate micronised 160mg tablets (Phoenix Healthcare Distribution Ltd) | Fenofibrate micronised | 160mg | Tablet | Oral | 2120300 | | Fibrates |
| Fibrates |  |  | 49609 | 155015001000027000 | 68507020 | Bezafibrate 400mg Modified-release tablet (Sandoz Ltd) | Bezafibrate | 400mg | Modified-release tablet | Oral | 2120300 | | Fibrates |
| Fibrates |  |  | 60788 | 10138711000001100 | 72640020 | Fenofibrate micronised 267mg capsules (Zentiva) | Fenofibrate micronised | 267mg | Capsule | Oral | 2120300 | | Fibrates |
| Fibrates |  |  | 73384 | 23977311000001100 | 21745021 | Fenofibrate micronised 200mg capsules (DE Pharmaceuticals) | Fenofibrate micronised | 200mg | Capsule | Oral | 2120300 | | Fibrates |
| Fibrates |  |  | 14379 | 2957011000001100 | 86194020 | Lipantil Micro 67 capsules (Mylan) | Fenofibrate micronised | 67mg | Capsule | Oral | 2120300 | | Fibrates |
| Fibrates |  |  | 74825 | 5384511000001100 | 2440020 | Lipantil Micro 200 capsules (Waymade Healthcare Plc) | Fenofibrate micronised | 200mg | Capsule | Oral | 2120300 | | Fibrates |
| Fibrates |  |  | 1477 | 49535001000027100 | 54229020 | Atromid -s 500mg Capsule (AstraZeneca UK Ltd) | Clofibrate | 500mg | Capsule | Oral | 2120300 | | Fibrates |
| Fibrates |  |  | 52814 | 3700511000001100 | 2404020 | Bezafibrate 400mg modified-release tablets (Alliance Healthcare (Distribution) Ltd) | Bezafibrate | 400mg | Modified-release tablet | Oral | 2120300 | | Fibrates |
| Fibrates |  |  | 1322 | 102975001000027000 | 61456020 | Clofibrate 500mg capsules | Clofibrate | 500mg | Capsules | Oral | 2120300 | | Fibrates |
| Fibrates |  |  | 29213 | 888111000001104 | 83750020 | Bezagen XL 400mg tablets (Mylan) | Bezafibrate | 400mg | Modified-release tablet | Oral | 2120300 | | Fibrates |
| Fibrates |  |  | 64933 | 13721411000001100 | 2460020 | Fenofibrate micronised 267mg capsules (Ranbaxy (UK) Ltd) | Fenofibrate micronised | 267mg | Capsule | Oral | 2120300 | | Fibrates |
| Fibrates |  |  | 33944 | 9526011000001100 | 71743020 | Bezafibrate 200mg tablets (Teva UK Ltd) | Bezafibrate | 200mg | Tablet | Oral | 2120300 | | Fibrates |
| Fibrates |  |  | 42801 | 103175001000027000 | 61483020 | Bezafibrate xl 400mg Modified-release tablet (Generics (UK) Ltd) | Bezafibrate | 400mg | Modified-release tablet | Oral | 2120300 | | Fibrates |
| Fibrates |  |  | 60385 | 16142411000001100 | 2412020 | Bezalip Mono 400mg modified-release tablets (Lexon (UK) Ltd) | Bezafibrate | 400mg | Modified-release tablet | Oral | 2120300 | | Fibrates |
| Fibrates |  |  | 71016 | 19713211000001100 | 38516020 | Ciprofibrate 100mg tablets (DE Pharmaceuticals) | Ciprofibrate | 100mg | Tablet | Oral | 2120300 | | Fibrates |
| Fibrates |  |  | 29328 | 527311000001109 | 61271020 | Bezafibrate 200mg tablets (A A H Pharmaceuticals Ltd) | Bezafibrate | 200mg | Tablet | Oral | 2120300 | | Fibrates |
| Fibrates |  |  | 72092 | 21979611000001100 | 47198020 | Fenofibrate micronised 160mg tablets (Waymade Healthcare Plc) | Fenofibrate micronised | 160mg | Tablet | Oral | 2120300 | | Fibrates |
| Fibrates |  |  | 70751 | 14285111000001100 | 2411020 | Bezalip Mono 400mg modified-release tablets (Sigma Pharmaceuticals Plc) | Bezafibrate | 400mg | Modified-release tablet | Oral | 2120300 | | Fibrates |
| Fibrates |  |  | 17614 | 880511000001105 | 84417020 | Zimbacol XL 400mg tablets (Archimedes Pharma UK Ltd) | Bezafibrate | 400mg | Modified-release tablet | Oral | 2120300 | | Fibrates |
| Fibrates |  |  | 50071 | 204365001000027000 | 77458020 | Fenofibrate 160mg Tablet (Teva UK Ltd) | Fenofibrate micronised | 160mg | Tablet | Oral | 2120300 | | Fibrates |
| Fibrates |  |  | 31783 | 9835611000001100 | 81036020 | Fenogal 200mg capsules (Genus Pharmaceuticals Ltd) | Fenofibrate | 200mg | Capsule | Oral | 2120300 | | Fibrates |
| Fibrates |  |  | 5390 | 319992003 | 86191020 | Fenofibrate micronised 267mg capsules | Fenofibrate micronised | 267mg | Capsule | Oral | 2120300 | | Fibrates |
| Fibrates |  |  | 73385 | 2953111000001100 | 2438020 | Fenofibrate micronised 200mg capsules (Kent Pharmaceuticals Ltd) | Fenofibrate micronised | 200mg | Capsule | Oral | 2120300 | | Fibrates |
| Fibrates |  |  | 70950 | 21979811000001100 | 47195020 | Fenofibrate micronised 200mg capsules (Waymade Healthcare Plc) | Fenofibrate micronised | 200mg | Capsule | Oral | 2120300 | | Fibrates |
| Fibrates |  |  | 39420 | 349711000001104 | 96391020 | Bezalip Mono 400mg modified-release tablets (Teva UK Ltd) | Bezafibrate | 400mg | Modified-release tablet | Oral | 2120300 | | Fibrates |
| Fibrates |  |  | 1324 | 66515001000027100 | 56377020 | Bezalip 200mg Tablet (Roche Products Ltd) | Bezafibrate | 200mg | Tablet | Oral | 2120300 | | Fibrates |
| Fibrates |  |  | 53250 | 16207911000001100 | 2566020 | Modalim 100mg tablets (Lexon (UK) Ltd) | Ciprofibrate | 100mg | Tablet | Oral | 2120300 | | Fibrates |
| Fibrates |  |  | 34181 | 101665001000027000 | 61270020 | Bezafibrate 400mg Modified-release tablet (Hillcross Pharmaceuticals Ltd) | Bezafibrate | 400mg | Modified-release tablet | Oral | 2120300 | | Fibrates |
| Fibrates |  |  | 33603 | 7531411000001100 | 88794020 | Fibrazate XL 400mg tablets (Sandoz Ltd) | Bezafibrate | 400mg | Modified-release tablet | Oral | 2120300 | | Fibrates |
| Niacin |  |  | 6515 | 86565001000027100 | 58938020 | Vitamin b compound strong syrup | Nicotinamide/Dexpanthenol/Pyridoxine Hydrochloride/Thiamine Hydrochloride/Riboflavin Sodium Phosphate |  | Syrup | Oral | 9060200 | | Vitamin B Group |
| Niacin |  |  | 55564 | 3036811000001100 | 7912020 | Topfit Vitamin B Complex tablets (Topfit Health Products Ltd) | Nicotinamide/Thiamine hydrochloride/Riboflavin | 15mg + 1mg + 1mg | Tablet | Oral | 9060200 | | Vitamin B Group |
| Niacin |  |  | 43832 | 8801111000001100 | 93169020 | Nicotinamide 500mg capsules | Nicotinamide | 500mg | Capsule | Oral | 9060200 | | Vitamin B Group |
| Niacin |  |  | 3883 | 329249000 | 52476020 | Nicotinamide 50mg tablets | Nicotinamide | 50mg | Tablet | Oral | 9060200 | | Vitamin B Group |
| Niacin |  |  | 42220 | 9798711000001100 | 69670020 | Vitamin B compound strong tablets (Almus Pharmaceuticals Ltd) | Nicotinamide/Pyridoxine hydrochloride/Riboflavin/Thiamine hydrochloride | 20mg + 2mg + 2mg + 5mg | Tablet | Oral | 9060200 | | Vitamin B Group |
| Niacin |  |  | 41564 | 51845001000027100 | 54492020 | Vitamin b co strong Tablet (IVAX Pharmaceuticals UK Ltd) | Nicotinamide/Pyridoxine hydrochloride/Riboflavin/Thiamine hydrochloride | 20mg + 2mg + 2mg + 5mg | Tablet | Oral | 9060200 | | Vitamin B Group |
| Niacin |  |  | 34778 | 2918911000001100 | 51974020 | Vitamin B compound strong tablets (A A H Pharmaceuticals Ltd) | Nicotinamide/Pyridoxine hydrochloride/Riboflavin/Thiamine hydrochloride | 20mg + 2mg + 2mg + 5mg | Tablet | Oral | 9060200 | | Vitamin B Group |
| Niacin |  |  | 53823 | 17383411000001100 | 37428020 | Solgar Niacin 500mg capsules (Solgar Vitamin and Herb) | Nicotinic acid | 500mg | Capsule | Oral | 9060200 | | Vitamin B Group |
| Niacin |  |  | 15333 | 43235001000027100 | 53435020 | Pabrinex intramuscular high potency Injection (Link Pharmaceuticals Ltd) | Nicotinamide/Pyridoxine Hydrochloride/Thiamine Hydrochloride/Ascorbic Acid/Riboflavin |  | Not applicable | Route of administration not applicable | 09060200/09060300 | | Vitamin B Group/Vitamin C |
| Niacin |  |  | 42223 | 118825001000027000 | 63644020 | Vitamin b Tablet (M & A Pharmachem Ltd) | Nicotinamide/Thiamine hydrochloride/Riboflavin | 15mg + 1mg + 1mg | Tablet | Oral | 9060200 | | Vitamin B Group |
| Niacin |  |  | 71864 | 3306611000001100 | 7921020 | Vitamin B compound strong tablets (Kent Pharmaceuticals Ltd) | Nicotinamide/Pyridoxine hydrochloride/Riboflavin/Thiamine hydrochloride | 20mg + 2mg + 2mg + 5mg | Tablet | Oral | 9060200 | | Vitamin B Group |
| Niacin |  |  | 2415 | 34820511000001100 | 58937020 | Vitamin B compound strong tablets | Nicotinamide/Pyridoxine hydrochloride/Riboflavin/Thiamine hydrochloride | 20mg + 2mg + 2mg + 5mg | Tablet | Oral | 9060200 | | Vitamin B Group |
| Niacin |  |  | 5704 | 86575001000027100 | 58939020 | Viatmin b compound strong forte tablets | Nicotinamide/Pyridoxine Hydrochloride/Thiamine Hydrochloride/Riboflavin |  | Forte Tablets | Oral | 9060200 | | Vitamin B Group |
| Niacin |  |  | 67155 | 18954311000001100 | 7918020 | Vitamin B compound tablets (Ennogen Healthcare Ltd) | Nicotinamide/Thiamine hydrochloride/Riboflavin | 15mg + 1mg + 1mg | Tablet | Oral | 9060200 | | Vitamin B Group |
| Niacin |  |  | 24244 | 2905001000027100 | 48346020 | Benerva Tablet (Roche Consumer Health) | Nicotinamide/Thiamine hydrochloride/Riboflavin | 15mg + 1mg + 1mg | Tablet | Oral | 9060200 | | Vitamin B Group |
| Niacin |  |  | 13844 | 88735001000027100 | 59248020 | Thiamine compound tablets | Nicotinamide/Thiamine Hydrochloride/Riboflavin |  | Tablets | Oral | 9060200 | | Vitamin B Group |
| Niacin |  |  | 61331 | 17876311000001100 | 7917020 | Vitamin B compound tablets (Phoenix Healthcare Distribution Ltd) | Nicotinamide/Thiamine hydrochloride/Riboflavin | 15mg + 1mg + 1mg | Tablet | Oral | 9060200 | | Vitamin B Group |
| Niacin |  |  | 22393 | 85205001000027100 | 58760020 | Becosym Tablet (Roche Consumer Health) | Nicotinamide/Pyridoxine hydrochloride/Riboflavin/Thiamine hydrochloride | 20mg + 2mg + 2mg + 5mg | Tablet | Oral | 9060200 | | Vitamin B Group |
| Niacin |  |  | 71683 | 22755211000001100 | 17221021 | Vitamin B compound strong tablets (Teva UK Ltd) | Nicotinamide/Pyridoxine hydrochloride/Riboflavin/Thiamine hydrochloride | 20mg + 2mg + 2mg + 5mg | Tablet | Oral | 9060200 | | Vitamin B Group |
| Niacin |  |  | 46959 | 15777211000001100 | 64149020 | Vitamin B compound tablets (BR Pharmaceuticals Ltd) | Nicotinamide/Thiamine hydrochloride/Riboflavin | 15mg + 1mg + 1mg | Tablet | Oral | 9060200 | | Vitamin B Group |
| Niacin |  |  | 15562 | 2665001000027100 | 48318020 | Becosym Oral solution (Roche Consumer Health) | Nicotinamide/Dexpanthenol/Pyridoxine Hydrochloride/Thiamine Hydrochloride/Riboflavin Sodium Phosphate |  | Oral Solution | Oral | 9060200 | | Vitamin B Group |
| Niacin |  |  | 1919 | 52685001000027100 | 54618020 | Parentrovite intramuscular high potency Injection (Bencard) | Nicotinamide/Pyridoxine Hydrochloride/Thiamine Hydrochloride/Ascorbic Acid/Riboflavin |  | Not applicable | Route of administration not applicable | 09060200/09060300 | | Vitamin B Group/Vitamin C |
| Niacin |  |  | 21052 | 2695001000027100 | 48321020 | Becosym forte Tablet (Roche Consumer Health) | Nicotinamide/Pyridoxine Hydrochloride/Thiamine Hydrochloride/Riboflavin |  | Tablet | Oral | 9060200 | | Vitamin B Group |
| Niacin |  |  | 32106 | 3303311000001100 | 50804020 | Vitamin B compound strong tablets (Actavis UK Ltd) | Nicotinamide/Pyridoxine hydrochloride/Riboflavin/Thiamine hydrochloride | 20mg + 2mg + 2mg + 5mg | Tablet | Oral | 9060200 | | Vitamin B Group |
| Niacin |  |  | 34809 | 15610211000001100 | 62420020 | Vitamin B compound tablets (Strides Pharma UK Ltd) | Nicotinamide/Thiamine hydrochloride/Riboflavin | 15mg + 1mg + 1mg | Tablet | Oral | 9060200 | | Vitamin B Group |
| Niacin |  |  | 23986 | 234535001000027000 | 86490020 | Becomplex forte Tablet (Dumex Ltd) | Nicotinamide/Pyridoxine hydrochloride/Riboflavin/Thiamine hydrochloride | 20mg + 2mg + 2mg + 5mg | Tablet | Oral | 9060200 | | Vitamin B Group |
| Niacin |  |  | 66233 | 15202211000001100 | 7916020 | Vitamin B compound tablets (Sigma Pharmaceuticals Plc) | Nicotinamide/Thiamine hydrochloride/Riboflavin | 15mg + 1mg + 1mg | Tablet | Oral | 9060200 | | Vitamin B Group |
| Niacin |  |  | 72917 | 22388011000001100 | 15706021 | Vitamin B compound tablets (Waymade Healthcare Plc) | Nicotinamide/Thiamine hydrochloride/Riboflavin | 15mg + 1mg + 1mg | Tablet | Oral | 9060200 | | Vitamin B Group |
| Niacin |  |  | 70589 | 15978911000001100 | 71615020 | Vitamin B compound strong tablets (Zanza Specials International Ltd) | Nicotinamide/Pyridoxine hydrochloride/Riboflavin/Thiamine hydrochloride | 20mg + 2mg + 2mg + 5mg | Tablet | Oral | 9060200 | | Vitamin B Group |
| Niacin |  |  | 58914 | 10794911000001100 | 98901020 | Nicotinamide 100mg tablets | Nicotinamide | 100mg | Tablet | Oral | 9060200 | | Vitamin B Group |
| Niacin |  |  | 41525 | 62455001000027100 | 55820020 | Vitamin b co strong Tablet (Approved Prescription Services Ltd) | Nicotinamide/Pyridoxine hydrochloride/Riboflavin/Thiamine hydrochloride | 20mg + 2mg + 2mg + 5mg | Tablet | Oral | 9060200 | | Vitamin B Group |
| Niacin |  |  | 51602 | 4288711000001100 | 13934020 | Nicotinamide 250mg tablets | Nicotinamide | 250mg | Tablet | Oral | 9060200 | | Vitamin B Group |
| Niacin |  |  | 9572 | 88705001000027100 | 59245020 | Thiamine compound strong tablets | Nicotinamide/Pyridoxine Hydrochloride/Thiamine/Riboflavin |  | Tablets | Oral | 9060200 | | Vitamin B Group |
| Niacin |  |  | 16372 | 43205001000027100 | 53432020 | Pabrinex intravenous high potency Injection (Link Pharmaceuticals Ltd) | Nicotinamide/Pyridoxine Hydrochloride/Thiamine Hydrochloride/Ascorbic Acid/Riboflavin |  | Not applicable | Route of administration not applicable | 09060200/09060300 | | Vitamin B Group/Vitamin C |
| Niacin |  |  | 2218 | 34820411000001100 | 59446020 | Vitamin B compound tablets | Nicotinamide/Thiamine hydrochloride/Riboflavin | 15mg + 1mg + 1mg | Tablet | Oral | 9060200 | | Vitamin B Group |
| Niacin |  |  | 8291 | 23745001000027100 | 50991020 | Parentrovite intravenous high potency Injection (Bencard) | Nicotinamide/Pyridoxine Hydrochloride/Thiamine Hydrochloride/Ascorbic Acid/Riboflavin |  | Not applicable | Route of administration not applicable | 09060200/09060300 | | Vitamin B Group/Vitamin C |
| Niacin |  |  | 43798 | 16101611000001100 | 98633020 | Nicotinamide 500mg tablets | Nicotinamide | 500mg | Tablet | Oral | 9060200 | | Vitamin B Group |
| Niacin |  |  | 41634 | 65145001000027100 | 56205020 | Vitamin b Tablet (Approved Prescription Services Ltd) | Nicotinamide/Thiamine hydrochloride/Riboflavin | 15mg + 1mg + 1mg | Tablet | Oral | 9060200 | | Vitamin B Group |
| Niacin |  |  | 48585 | 17429711000001100 | 37427020 | Nicotinic acid 500mg capsules | Nicotinic acid | 500mg | Capsule | Oral | 9060200 | | Vitamin B Group |
| Niacin |  |  | 2634 | 87825001000027100 | 59115020 | Multivitamin sugar coated Tablet (Sussex Pharmaceutical Ltd) | Nicotinamide/Thiamine Hydrochloride/Vitamin A/Vitamin D/Ascorbic Acid/Riboflavin |  | Tablet | Oral | 9060700 | | Multivitamin And Multimineral Preparations |
| Niacin |  |  | 42583 | 246165001000027000 | 92631020 | Multivitamins with minerals, trace elements and ginseng Capsule | Lecithin/Nicotinamide/Calcium Phosphate/Magnesium Sulphate Heptahydrate/Copper Sulphate/Biotin/Cyanocobalamin/Ginseng/Pyridoxine Hydrochloride/Thiamine/Vitamin A/Sodium Selenite/Zinc Sulphate/Ferrous Sulphate/Ascorbic Acid/Riboflavin/Alpha Tocopheryl Acetate/Colecalciferol/Folic Acid |  | Capsule | Oral | 9060750 | | - |
| Niacin |  |  | 41815 | 221745001000027000 | 82991020 | Vitamins a & d with other vitamins capsules | Nicotinamide/Cyanocobalamin/Pyridoxine Hydrochloride/Thiamine Nitrate/Vitamin A/Vitamin D/Pantothenic Acid/Ascorbic Acid/Riboflavin/Alpha Tocopherol/Folic Acid/Eicosapentaenoic Acid/Docosahexaenoic Acid |  | Capsules | Oral | 9060700 | | Multivitamin And Multimineral Preparations |
| Niacin |  |  | 5608 | 221895001000027000 | 83024020 | Vitamin c with vitamins & minerals capsules | Calcium Carbonate/Magnesium Oxide/Nicotinamide/Cyanocobalamin/Pyridoxine Hydrochloride/Thiamine Hydrochloride/Vitamin A/Vitamin D/Ferrous Sulphate/Ascorbic Acid/Riboflavin/Alpha Tocopherol/Folic Acid |  | Capsules | Oral | 09010101/09060300 | | Oral Iron/Vitamin C |
| Niacin |  |  | 41990 | 180555001000027000 | 72388020 | Multivitamins with minerals Tablet | Pantothenic Acid/Ascorbic Acid/Calcium/Folic Acid/Iron/Nicotinic Acid/Riboflavin/Pyridoxine/Alpha Tocopherol/Vitamin A/Vitamin D/Thiamine/Vitamin B12 |  | Tablet | Oral | 9060750 | | - |
| Niacin |  |  | 1548 | 3390011000001100 | 56220020 | Abidec Multivitamin drops (Omega Pharma Ltd) | Vitamin A palmitate/Ergocalciferol/Thiamine hydrochloride/Riboflavin/Pyridoxine hydrochloride/Nicotinamide/Ascorbic acid | 2222iu/1ml + 667iu/1ml + 1.67mg/1ml + 1333microgram/1ml + 1333microgram/1ml + 1333microgram/1ml + 66.7mg/1ml | Oral drops | Oral | 9060700 | | Multivitamin And Multimineral Preparations |
| Niacin |  |  | 72413 | 2872911000001100 | 35542020 | Vitamins capsules (Alliance Healthcare (Distribution) Ltd) | Vitamin D/Vitamin A/Thiamine hydrochloride/Riboflavin/Nicotinamide/Ascorbic acid | 300unit + 2500unit + 1mg + 500microgram + 7.5mg + 15mg | Capsule | Oral | 9060700 | | Multivitamin And Multimineral Preparations |
| Niacin |  |  | 32965 | 44725001000027100 | 53635020 | Vitamin Capsule (Approved Prescription Services Ltd) | Vitamin D/Vitamin A/Thiamine hydrochloride/Riboflavin/Nicotinamide/Ascorbic acid | 300unit + 2500unit + 1mg + 500microgram + 7.5mg + 15mg | Capsule | Oral | 9060700 | | Multivitamin And Multimineral Preparations |
| Niacin |  |  | 24527 | 227185001000027000 | 84585020 | Vitamins a & d with other vitamins & minerals capsules | Zinc Oxide/Lecithin/Nicotinamide/Calcium Phosphate/Inositol/Potassium Sulphate/Cobalt Sulphate/Copper Sulphate/Lysine Acetylsalicylate/Adenosine/Biotin/Choline Hydrogen Tartrate/Cyanocobalamin/Dexpanthenol/Pyridoxine Hydrochloride/Rutoside/Thiamine Nitrate/Vitamin A/Ethyl Linoleate/Sodium Molybdate/Magnesium Glycerophosphate/Ferrous Sulphate/Ascorbic Acid/Riboflavin/Alpha Tocopherol/Colecalciferol/Folic Acid/Manganese Sulphate/Orotic Acid Anhydrous |  | Capsules | Oral | 9060700 | | Multivitamin And Multimineral Preparations |
| Niacin |  |  | 6069 | 50695001000027100 | 54356020 | Vitamin bpc sugar-coated tablets | Nicotinamide/Thiamine Hydrochloride/Vitamin A/Vitamin D/Ascorbic Acid/Riboflavin |  | Sugar-Coated Tablets | Oral | 9060700 | | Multivitamin And Multimineral Preparations |
| Niacin |  |  | 41410 | 241375001000027000 | 89624020 | Vitamin a, c & d with 10 other vitamins & zinc (combination 1) drops | Pantothenic Acid/Biotin/Ascorbic Acid/Nicotinic Acid/Phytomenadione/Riboflavin/Pyridoxine/Alpha Tocopherol/Vitamin A/Zinc Sulphate/Colecalciferol/Beta Carotene/Thiamine/Vitamin B12 |  | Drops | Oral | 9060750 | | - |
| Niacin |  |  | 37674 | 192715001000027000 | 74530020 | Vitamins additive to infusion solution powder for conc | Pantothenic Acid/Biotin/Ascorbic Acid/Folic Acid/Nicotinamide/Pyridoxine Hydrochloride/Riboflavin/Thiamine/Vitamin B12 |  | Powder For Concentrate | Intravenous Infusion | 9030000 | | Intravenous Nutrition |
| Niacin |  |  | 16737 | 2873211000001100 | 56158020 | HealthAid Multivitamin capsules (Pharmadass Ltd) | Vitamin D/Vitamin A/Thiamine hydrochloride/Riboflavin/Nicotinamide/Ascorbic acid | 300unit + 2500unit + 1mg + 500microgram + 7.5mg + 15mg | Capsule | Oral | 9060700 | | Multivitamin And Multimineral Preparations |
| Niacin |  |  | 19583 | 4921911000001100 | 69940020 | Concavit capsules (Wallace Manufacturing Chemists Ltd) | Vitamin A/Ergocalciferol/Ascorbic acid/Thiamine nitrate/Riboflavin/Pyridoxine hydrochloride/Nicotinamide/Calcium pantothenate/Alpha tocopheryl acetate | 5000unit + 500unit + 40mg + 2.5mg + 2.5mg + 1mg + 20mg + 5mg + 2unit | Capsule | Oral | 9060700 | | Multivitamin And Multimineral Preparations |
| Niacin |  |  | 61507 | 3543011000001100 | 12927020 | Generic Forceval capsules | Selenium/Zinc/Phosphorus/Potassium/Molybdenum/Manganese/Pyridoxine/Pantothenic acid/Nicotinamide/Folic acid/Cyanocobalamin/Biotin/Ascorbic acid/Tocopheryl acetate/Magnesium/Vitamin A/Ergocalciferol/Iron/Iodine/Copper/Chromium/Calcium/Riboflavin/Thiamine | 50microgram + 15mg + 77mg + 4mg + 250microgram + 3mg + 2mg + 4mg + 18mg + 400microgram + 3microgram + 100microgram + 60mg + 10mg + 30mg + 2500unit + 400unit + 12mg + 140microgram + 2mg + 200microgram + 100mg + 1.6mg + 1.2mg | Capsule | Oral | 9060700 | | Multivitamin And Multimineral Preparations |
| Niacin |  |  | 33979 | 209455001000027000 | 79141020 | Vitamin a, c & d with 4 other vitamins (combination no2) oral solution | Ascorbic Acid/Nicotinamide/Riboflavin/Thiamine Hydrochloride/Vitamin A/Vitamin D/Vitamin B12 |  | Oral Solution | Oral | 9060700 | | Multivitamin And Multimineral Preparations |
| Niacin |  |  | 12891 | 225135001000027000 | 83973020 | Superted multivitamins & iron Chewable tablet (Chefaro UK Ltd) | Stearic Acid (E570)/Magnesium Stearate (E572)/Pyridoxine Hydrochloride/Thiamine Nitrate/Vitamin A/Ferrous Sulphate/Ascorbic Acid/Riboflavin/Colecalciferol/Dicalcium Phosphate/Folic Acid |  | Chewable Tablet | Oral | 9060750 | | - |
| Niacin |  |  | 32387 | 241395001000027000 | 89626020 | Adeks Drops (Scandipharm) | Pantothenic Acid/Biotin/Ascorbic Acid/Nicotinic Acid/Phytomenadione/Riboflavin/Pyridoxine/Alpha Tocopherol/Vitamin A/Zinc Sulphate/Colecalciferol/Beta Carotene/Thiamine/Vitamin B12 |  | Drops | Oral | 9060750 | | - |
| Niacin |  |  | 9107 | 25805001000027100 | 51231020 | Pregnavite Forte F Tablet (Goldshield Pharmaceuticals Ltd) | Nicotinamide/Calcium Phosphate/Pyridoxine Hydrochloride/Thiamine Hydrochloride/Vitamin A/Vitamin D/Ferrous Sulphate/Ascorbic Acid/Riboflavin/Folic Acid |  | Tablet | Oral | 9010101 | | Oral Iron |
| Niacin |  |  | 4484 | 197645001000027000 | 75531020 | Orovite 7 Granules (Actavis UK Ltd) | Nicotinamide/Pyridoxine Hydrochloride/Thiamine Nitrate/Vitamin A/Vitamin D/Ascorbic Acid/Riboflavin |  | Granules | Oral | 9060700 | | Multivitamin And Multimineral Preparations |
| Niacin |  |  | 6582 | 188375001000027000 | 73668020 | Multivitamins Drops | Nicotinamide/Pyridoxine Hydrochloride/Thiamine Hydrochloride/Vitamin A/Vitamin D/Ascorbic Acid/Riboflavin |  | Drops | Oral | 9060700 | | Multivitamin And Multimineral Preparations |
| Niacin |  |  | 15251 | 209345001000027000 | 79108020 | Pregnacare Capsule (Vitabiotics Ltd) | Ascorbic Acid/Copper/Folic Acid/Iodine/Iron/Magnesium/Nicotinic Acid/Riboflavin/Pyridoxine/Soya Oil/Vitamin D/Zinc/Alpha Tocopheryl Hydrogen Succinate/Selenium/Beta Carotene/Vitamin K/Thiamine/Vitamin B12 |  | Capsule | Oral | 9060750 | | - |
| Niacin |  |  | 44636 | 12781111000001100 | 99118020 | Vivioptal Junior liquid (Scope Ophthalmics Ltd) | Pantothenic Acid/Biotin/Ascorbic Acid/Copper Sulphate/Folic Acid/Manganese Sulphate/Magnesium/Nicotinamide/Potassium/Riboflavin/Pyridoxine/Alpha Tocopherol/Vitamin A/Vitamin D/Ferric Ammonium Citrate/Zinc Gluconate/Vitamin B12 |  | Liquid | Oral | 9060700 | | Multivitamin And Multimineral Preparations |
| Niacin |  |  | 1856 | 14609411000001100 | 54355020 | Vitamins capsules | Vitamin D/Vitamin A/Thiamine hydrochloride/Riboflavin/Nicotinamide/Ascorbic acid | 300unit + 2500unit + 1mg + 500microgram + 7.5mg + 15mg | Capsule | Oral | 9060700 | | Multivitamin And Multimineral Preparations |
| Niacin |  |  | 30181 | 221905001000027000 | 83026020 | Sanatogen teen Capsule (Roche Consumer Health) | Calcium Carbonate/Magnesium Oxide/Nicotinamide/Cyanocobalamin/Pyridoxine Hydrochloride/Thiamine Hydrochloride/Vitamin A/Vitamin D/Ferrous Sulphate/Ascorbic Acid/Riboflavin/Alpha Tocopherol/Folic Acid |  | Capsule | Oral | 09010101/09060300 | | Oral Iron/Vitamin C |
| Niacin |  |  | 59792 | 22737111000001100 | 17268021 | Vitamins capsules (DE Pharmaceuticals) | Vitamin D/Vitamin A/Thiamine hydrochloride/Riboflavin/Nicotinamide/Ascorbic acid | 300unit + 2500unit + 1mg + 500microgram + 7.5mg + 15mg | Capsule | Oral | 9060700 | | Multivitamin And Multimineral Preparations |
| Niacin |  |  | 34246 | 122155001000027000 | 64136020 | Vitamin Capsule (BR Pharmaceuticals Ltd) | Vitamin D/Vitamin A/Thiamine hydrochloride/Riboflavin/Nicotinamide/Ascorbic acid | 300unit + 2500unit + 1mg + 500microgram + 7.5mg + 15mg | Capsule | Oral | 9060700 | | Multivitamin And Multimineral Preparations |
| Niacin |  |  | 2724 | 3289311000001100 | 53381020 | Dalivit oral drops (Boston Healthcare Ltd) | Thiamine/Riboflavin/Pyridoxine/Ascorbic acid/Nicotinamide/Ergocalciferol/Vitamin A | 1667microgram/1ml + 667microgram/1ml + 833microgram/1ml + 83mg/1ml + 8.3mg/1ml + 667iu/1ml + 8333iu/1ml | Oral drops | Oral | 9060700 | | Multivitamin And Multimineral Preparations |
| Niacin |  |  | 69131 | 21021411000001100 | 44138020 | Generic Forceval Soluble tablets sugar free | Cyanocobalamin/Phosphorus/Alpha tocopheryl acetate/Thiamine/Copper/Iron/Folic acid/Pantothenic acid/Nicotinamide/Biotin/Ascorbic acid/Ergocalciferol/Pyridoxine/Riboflavin/Vitamin A/Molybdenum/Chromium/Selenium/Manganese/Zinc/Potassium/Calcium/Magnesium/Iodine | 3microgram + 51.5mg + 10mg + 1.2mg + 2mg + 12mg + 400microgram + 4mg + 18mg + 100microgram + 60mg + 400unit + 2mg + 1.6mg + 2500unit + 250microgram + 200microgram + 50microgram + 3mg + 15mg + 4mg + 100mg + 30mg + 140microgram | Soluble tablet | Oral | 9040251 | | Nutritional Supplements |
| Niacin |  |  | 38412 | 209745001000027000 | 79215020 | Vitamin a, c & d with 6 other vitamins (combination no1) capsules | Nicotinamide/Calcium Pantothenate/Pyridoxine Hydrochloride/Thiamine Nitrate/Vitamin A/Vitamin D/Ascorbic Acid/Riboflavin/Alpha Tocopheryl Acetate |  | Capsules | Oral | 9060700 | | Multivitamin And Multimineral Preparations |
| Niacin |  |  | 69601 | 3394711000001100 | 11546020 | Generic Dalivit oral drops | Thiamine/Riboflavin/Pyridoxine/Ascorbic acid/Nicotinamide/Ergocalciferol/Vitamin A | 1667microgram/1ml + 667microgram/1ml + 833microgram/1ml + 83mg/1ml + 8.3mg/1ml + 667iu/1ml + 8333iu/1ml | Oral drops | Oral | 9060700 | | Multivitamin And Multimineral Preparations |
| Niacin |  |  | 4019 | 50711000001106 | 71047020 | Forceval capsules (Forum Health Products Ltd) | Selenium/Zinc/Phosphorus/Potassium/Molybdenum/Manganese/Pyridoxine/Pantothenic acid/Nicotinamide/Folic acid/Cyanocobalamin/Biotin/Ascorbic acid/Tocopheryl acetate/Magnesium/Vitamin A/Ergocalciferol/Iron/Iodine/Copper/Chromium/Calcium/Riboflavin/Thiamine | 50microgram + 15mg + 77mg + 4mg + 250microgram + 3mg + 2mg + 4mg + 18mg + 400microgram + 3microgram + 100microgram + 60mg + 10mg + 30mg + 2500unit + 400unit + 12mg + 140microgram + 2mg + 200microgram + 100mg + 1.6mg + 1.2mg | Capsule | Oral | 9060700 | | Multivitamin And Multimineral Preparations |
| Niacin |  |  | 27594 | 4922811000001100 | 69942020 | Concavit drops (Wallace Manufacturing Chemists Ltd) | Nicotinamide/Dexpanthenol/Pyridoxine hydrochloride/Riboflavin sodium phosphate/Sodium ascorbate/Thiamine hydrochloride/Ascorbic acid/Ergocalciferol/Vitamin A | 25mg/1ml + 4mg/1ml + 2mg/1ml + 2mg/1ml + 68.88mg/1ml + 4mg/1ml + 38.7mg/1ml + 1000unit/1ml + 10000unit/1ml | Oral drops | Oral | 9060700 | | Multivitamin And Multimineral Preparations |
| Niacin |  |  | 15980 | 203925001000027000 | 77339020 | Centrum Tablet (Wyeth Consumer Healthcare) | Biotin/Sodium Molybdate/Ascorbic Acid/Calcium Pantothenate/Copper Sulphate/Folic Acid/Ferrous Fumarate/Magnesium Oxide/Manganese Sulphate/Nicotinamide/Potassium Chloride/Potassium Iodide/Riboflavin/Pyridoxine/Alpha Tocopherol/Vitamin A/Vitamin |  | Tablet | Oral | 9060750 | | - |
| Niacin |  |  | 17735 | 11295001000027100 | 49415020 | Fefol -vit spansule Spansule (Celltech Pharma Europe Ltd) | Nicotinamide/Pyridoxine Hydrochloride/Thiamine Nitrate/Ferrous Sulphate/Ascorbic Acid/Riboflavin/Folic Acid |  | Spansule | Oral | 9010101 | | Oral Iron |
| Niacin |  |  | 46640 | 265375001000027000 | 8021 | Vitamin a, c & d with multivitamins & minerals tablets | Pantothenic Acid/Biotin/Ascorbic Acid/Vitamin A Acetate/Copper Sulphate/Folic Acid/Ferrous Fumarate/Manganese Sulphate/Nicotinamide/Potassium Chloride/Potassium Iodide/Pyridoxine Hydrochloride/Riboflavin/Alpha Tocopheryl Acetate/Vitamin D/Zinc |  | Tablets | Oral | 9060750 | | - |
| Niacin |  |  | 4208 | 332376005 | 79766020 | Nicotinamide 4% gel | Nicotinamide | 40mg/1gram | Gel | Cutaneous | 13060104 | | Other Topical Preparations For Acne |
| Niacin |  |  | 20030 | 4386311000001100 | 74485020 | Multibionta solution for infusion 10ml ampoules (Merck Serono Ltd) | Riboflavin sodium phosphate/Ascorbic acid/Dexpanthenol/Nicotinamide/Pyridoxine hydrochloride/Thiamine hydrochloride/Alpha tocopheryl acetate/Retinol | 1mg/1ml + 50mg/1ml + 2.5mg/1ml + 10mg/1ml + 1.5mg/1ml + 5mg/1ml + 500microgram/1ml + 1000unit/1ml | Solution for infusion | Intravenous | 0 | | Unknown |
| Niacin |  |  | 40285 | 257075001000027000 | 96790020 | Freederm Gel (Dendron Ltd) | Nicotinamide | 40mg/1gram | Gel | Cutaneous | 13060104 | | Other Topical Preparations For Acne |
| Niacin |  |  | 23022 | 4936611000001100 | 69941020 | Concavit syrup (Wallace Manufacturing Chemists Ltd) | Vitamin A/Ergocalciferol/Ascorbic acid/Sodium ascorbate/Thiamine hydrochloride/Riboflavin sodium phosphate/Pyridoxine hydrochloride/Nicotinamide/Dexpanthenol | 1000unit/1ml + 100unit/1ml + 3.87mg/1ml + 6.89mg/1ml + 400microgram/1ml + 200microgram/1ml + 200microgram/1ml + 2.5mg/1ml + 400microgram/1ml | Oral solution | Oral | 9060700 | | Multivitamin And Multimineral Preparations |
| Niacin |  |  | 6201 | 4037511000001100 | 84174020 | Nicam 4% gel (Dermal Laboratories Ltd) | Nicotinamide | 40mg/1gram | Gel | Cutaneous | 13060104 | | Other Topical Preparations For Acne |
| Niacin |  |  | 19084 | 4761211000001100 | 82542020 | Pharmaton Vitality capsules (Sanofi) | Vitamin A palmitate/Ginseng standardised extract/Colecalciferol/Alpha tocopheryl acetate/Thiamine nitrate/Riboflavin/Pyridoxine hydrochloride/Cyanocobalamin/Biotin/Nicotinamide/Ascorbic acid/Folic acid/Copper sulfate anhydrous/Sodium selenite/Magnesium sulfate dried/Ferrous sulfate dried/Zinc sulfate monohydrate/Calcium hydrogen phosphate anhydrous/Lecithin | 2667unit + 40mg + 200unit + 10mg + 1.4mg + 1.6mg + 2mg + 1microgram + 150microgram + 18mg + 60mg + 100microgram + 2mg + 50microgram + 10mg + 10mg + 1mg + 100mg + 100mg | Capsule | Oral | 9040251 | | Nutritional Supplements |
| Niacin |  |  | 1982 | 171915001000027000 | 71048020 | Forceval Capsule (Alliance Pharmaceuticals Ltd) | Magnesium Oxide/Betacarotene/Nicotinamide/Potassium Iodide/Copper Sulphate/Biotin/Cyanocobalamin/Ergocalciferol/Phytomenadione/Pyridoxine/Thiamine/Ferrous Fumarate/Sodium Molybdate/Pantothenic Acid/Zinc Sulphate/Ascorbic Acid/Riboflavin/Alpha Tocopheryl Acetate/Chromium/Selenium/Folic Acid/Manganese Sulphate |  | Capsule | Oral | 9060750 | | - |
| Niacin |  |  | 14481 | 4749111000001100 | 71124020 | Effico Tonic (Forest Laboratories UK Ltd) | Thiamine hydrochloride/Nicotinamide/Caffeine | 36microgram/1ml + 420microgram/1ml + 4.04mg/1ml | Oral solution | Oral | 9070000 | | Bitters And Tonics |
| Niacin |  |  | 27069 | 240165001000027000 | 88853020 | Ferrous sulphate with folic acid, ascorbic acid and b group vitamins Capsule | Nicotinamide/Thiamine Hydrochloride/Ferrous Sulphate/Ascorbic Acid/Riboflavin/Folic Acid |  | Capsule | Oral | 09010101/09060700 | | Oral Iron/Multivitamin And Multimineral Preparations |
| Niacin |  |  | 14508 | 210885001000027000 | 79582020 | Nephrovite Tablet (Kimal Scientific Products Ltd) | Nicotinamide/Biotin/Cyanocobalamin/Thiamine Nitrate/Pantothenic Acid/Ascorbic Acid/Riboflavin/Folic Acid |  | Tablet | Oral | 9060700 | | Multivitamin And Multimineral Preparations |
| Niacin |  |  | 10920 | 211635001000027000 | 79764020 | Papulex 4% Gel (Stevenden Healthcare) | Nicotinamide | 40mg/1gram | Gel | Cutaneous | 13060104 | | Other Topical Preparations For Acne |
| Niacin |  |  | 48856 | 21020011000001100 | 44139020 | Forceval Soluble tablets (Alliance Pharmaceuticals Ltd) | Cyanocobalamin/Phosphorus/Alpha tocopheryl acetate/Thiamine/Copper/Iron/Folic acid/Pantothenic acid/Nicotinamide/Biotin/Ascorbic acid/Ergocalciferol/Pyridoxine/Riboflavin/Vitamin A/Molybdenum/Chromium/Selenium/Manganese/Zinc/Potassium/Calcium/Magnesium/Iodine | 3microgram + 51.5mg + 10mg + 1.2mg + 2mg + 12mg + 400microgram + 4mg + 18mg + 100microgram + 60mg + 400unit + 2mg + 1.6mg + 2500unit + 250microgram + 200microgram + 50microgram + 3mg + 15mg + 4mg + 100mg + 30mg + 140microgram | Soluble tablet | Oral | 9040251 | | Nutritional Supplements |
| Niacin |  |  | 30777 | 31925001000027100 | 51967020 | Vitamin Capsule (Actavis UK Ltd) | Vitamin D/Vitamin A/Thiamine hydrochloride/Riboflavin/Nicotinamide/Ascorbic acid | 300unit + 2500unit + 1mg + 500microgram + 7.5mg + 15mg | Capsule | Oral | 9060700 | | Multivitamin And Multimineral Preparations |
| Niacin |  |  | 49581 | 21020311000001100 | 44137020 | Forceval Soluble Junior tablets (Alliance Pharmaceuticals Ltd) | Pantothenic acid/Phytomenadione/Folic acid/Iron/Copper/Magnesium/Iodine/Potassium/Zinc/Manganese/Selenium/Chromium/Molybdenum/Vitamin A/Alpha tocopheryl acetate/Ergocalciferol/Thiamine/Riboflavin/Pyridoxine/Cyanocobalamin/Ascorbic acid/Biotin/Nicotinamide | 2mg + 25microgram + 100microgram + 5mg + 1mg + 1mg + 75microgram + 96mg + 5mg + 1.3mg + 25microgram + 50microgram + 50microgram + 1250unit + 5mg + 200unit + 1.5mg + 1mg + 1mg + 2microgram + 25mg + 50microgram + 7.5mg | Tablet | Oral | 9040251 | | Nutritional Supplements |
| Niacin |  |  | 57799 | 3396911000001100 | 11766020 | Generic Abidec Multivitamin drops | Vitamin A palmitate/Ergocalciferol/Thiamine hydrochloride/Riboflavin/Pyridoxine hydrochloride/Nicotinamide/Ascorbic acid | 2222iu/1ml + 667iu/1ml + 1.67mg/1ml + 1333microgram/1ml + 1333microgram/1ml + 1333microgram/1ml + 66.7mg/1ml | Oral drops | Oral | 9060700 | | Multivitamin And Multimineral Preparations |
| Niacin |  |  | 28992 | 233335001000027000 | 86148020 | Vitamins c e & k with 8 other vitamins (combination no1) tablets | Nicotinamide/Inositol/Biotin/Calcium Pantothenate/Pyridoxine Hydrochloride/Thiamine Hydrochloride/Ascorbic Acid/Riboflavin/Alpha Tocopheryl Acetate/Folic Acid/Acetomenaphthone |  | Tablets | Oral | 9060750 | | - |
| Niacin |  |  | 31972 | 177985001000027000 | 71991020 | Prolintane hydrochloride with vitamins liquid | Nicotinamide/Pyridoxine Hydrochloride/Thiamine Hydrochloride/Riboflavin Sodium Phosphate/Prolintane |  | Tablets | Oral | 4040000 | | CNS Stimulants And Drugs Used For Attention Deficit Hyperactivity Disorder |
| Niacin |  |  | 27169 | 9531511000001100 | 71530020 | Vigranon-B syrup (Wallace Manufacturing Chemists Ltd) | Thiamine hydrochloride/Riboflavin sodium phosphate/Dexpanthenol/Pyridoxine hydrochloride/Nicotinamide | 1mg/1ml + 548microgram/1ml + 600microgram/1ml + 400microgram/1ml + 4mg/1ml | Oral solution | Oral | 9060200 | | Vitamin B Group |
| Niacin |  |  | 14852 | 180575001000027000 | 72391020 | Multivitamins with minerals and trace elements Capsule | Magnesium Oxide/Betacarotene/Nicotinamide/Potassium Iodide/Potassium Sulphate/Copper Sulphate/Biotin/Cyanocobalamin/Ergocalciferol/Pyridoxine/Thiamine/Ferrous Fumarate/Sodium Molybdate/Pantothenic Acid/Zinc Sulphate/Ascorbic Acid/Riboflavin/Alpha Tocopheryl Acetate/Chromium/Selenium/Dicalcium Phosphate/Folic Acid/Manganese Sulphate |  | Capsule | Oral | 9060750 | | - |
| Niacin |  |  | 35823 | 5340211000001100 | 68622020 | Cernevit solution for injection vials and diluent (Baxter Healthcare Ltd) | Nicotinamide/Biotin/Dexpanthenol/Folic acid/Cyanocobalamin/Pyridoxine hydrochloride/Thiamine/Riboflavin sodium phosphate/Ascorbic acid/Retinol/Colecalciferol/Alpha tocopherol | 46mg + 69microgram + 17.25mg + 414microgram + 6microgram + 4.53mg + 3.51mg + 4.14mg + 125mg + 3500unit + 220unit + 11.2unit | Solution for injection | Intravenous | 9030000 | | Intravenous Nutrition |
| Niacin |  |  | 46023 | 205105001000027000 | 77657020 | Multivitamins with minerals and herb extracts Capsule | Biotin/Ascorbic Acid/Cyanocobalamin/Cysteine/Calcium Pantothenate/Copper Sulphate/Folic Acid/Ferrous Fumarate/Magnesium Oxide/Manganese Sulphate/Nicotinamide/Potassium Iodide/Pyridoxine Hydrochloride/Riboflavin/Alpha Tocopherol/Zinc Sulphate/Co |  | Capsule | Oral | 9060750 | | - |
| Niacin |  |  | 66662 | 225985001000027000 | 84184020 | Strezz-B-Vit Tablet (Ferrosan Healthcare) | Nicotinamide/Biotin/Cyanocobalamin/Thiamine Nitrate/Pantothenic Acid/Ascorbic Acid/Riboflavin/Folic Acid |  | Tablet |  | 9060700 | | Multivitamin And Multimineral Preparations |
| Niacin |  |  | 51752 | 8115911000001100 | 18800020 | Generic Yeast-Vite tablets | Caffeine/Nicotinamide/Thiamine hydrochloride/Riboflavin | 50mg + 1.75mg + 167microgram + 167microgram | Tablet | Oral | 9060000 | | Vitamins |
| Niacin |  |  | 38775 | 8135911000001100 | 91911020 | Wate-On oral emulsion (Dendron Ltd) | Maize oil/Nicotinamide/Riboflavin sodium phosphate/Pyridoxine hydrochloride/Thiamine hydrochloride/Calcium pantothenate/Ergocalciferol/Glucose monohydrate | 493.4mg/1ml + 190microgram/1ml + 36.6microgram/1ml + 23.4microgram/1ml + 16.6microgram/1ml + 13.4microgram/1ml + 110nanogram/1ml + 136.6mg/1ml | Oral emulsion | Oral | 0 | | Unknown |
| Niacin |  |  | 25040 | 34135001000027100 | 52239020 | Verdiviton Oral solution (Bristol-Myers Squibb Pharmaceuticals Ltd) | Alcohol/Cyanocobalamin/Calcium Glycerophosphate/Manganese Glycerophosphate/Nicotinamide/Pyridoxine Hydrochloride/Panthenol/Potassium Glycerophosphate/Riboflavin/Sodium Glycerophosphate/Thiamine Nitrate |  | Oral Solution | Oral | 9060700 | | Multivitamin And Multimineral Preparations |
| Niacin |  |  | 21068 | 55265001000027100 | 54935020 | Villescon Tablet (Boehringer Ingelheim Ltd) | Nicotinamide/Pyridoxine Hydrochloride/Thiamine Hydrochloride/Riboflavin Sodium Phosphate/Prolintane |  | Tablet | Oral | 4040000 | | CNS Stimulants And Drugs Used For Attention Deficit Hyperactivity Disorder |
| Niacin |  |  | 22510 | 136115001000027000 | 65922020 | Polyestradiol phosphate 80mg injection | Mepivacaine Hydrochloride/Nicotinamide/Polyestradiol Phosphate | 80mg | Injection |  | 8030100 | | Oestrogens (In Malignant Disease) |
| Niacin |  |  | 22187 | 210925001000027000 | 79602020 | Vitamins b complex & c with folic acid tablets | Nicotinamide/Biotin/Cyanocobalamin/Thiamine Nitrate/Pantothenic Acid/Ascorbic Acid/Riboflavin/Folic Acid |  | Tablets | Oral | 9060700 | | Multivitamin And Multimineral Preparations |
| Niacin |  |  | 58740 | 3544211000001100 | 12955020 | Generic Ketovite tablets | Ascorbic acid/Riboflavin/Thiamine hydrochloride/Pyridoxine hydrochloride/Nicotinamide/Calcium pantothenate/Alpha tocopheryl acetate/Inositol/Biotin/Folic acid/Acetomenaphthone | 16.6mg + 1mg + 1mg + 330microgram + 3.3mg + 1.16mg + 5mg + 50mg + 170microgram + 250microgram + 500microgram | Tablet | Oral | 9060700 | | Multivitamin And Multimineral Preparations |
| Niacin |  |  | 41022 | 8138311000001100 | 88859020 | Ironorm syrup (Wallace Manufacturing Chemists Ltd) | Ferric ammonium citrate/Thiamine hydrochloride/Riboflavin/Pyridoxine hydrochloride/Nicotinamide/Calcium pantothenate/Calcium glycerophosphate/Sodium glycerophosphate/Potassium glycerophosphate/Manganese glycerophosphate | 50mg/1ml + 100microgram/1ml + 50microgram/1ml + 25microgram/1ml + 750microgram/1ml + 25microgram/1ml + 2.15mg/1ml + 4.25mg/1ml + 350microgram/1ml + 200microgram/1ml | Oral solution | Oral | 09010000/09010100/09040251 | | Anaemias And Some Other Blood Disorders/Iron-Deficiency Anaemias/Nutritional Supplements |
| Niacin |  |  | 33224 | 180585001000027000 | 72392020 | Multivitamins with minerals and trace elements Capsule | Magnesium Oxide/Betacarotene/Nicotinamide/Potassium Iodide/Copper Sulphate/Biotin/Cyanocobalamin/Ergocalciferol/Phytomenadione/Pyridoxine/Thiamine/Ferrous Fumarate/Sodium Molybdate/Pantothenic Acid/Zinc Sulphate/Ascorbic Acid/Riboflavin/Alpha Tocopheryl Acetate/Chromium/Selenium/Folic Acid/Manganese Sulphate |  | Capsule | Oral | 9060750 | | - |
| Niacin |  |  | 18279 | 65475001000027100 | 56248020 | Fesovit z spansule Spansule (Celltech Pharma Europe Ltd) | Nicotinamide/Pyridoxine Hydrochloride/Thiamine Hydrochloride/Zinc Sulphate/Ferrous Sulphate/Ascorbic Acid/Riboflavin |  | Spansule | Oral | 09010101/09060700 | | Oral Iron/Multivitamin And Multimineral Preparations |
| Niacin |  |  | 18752 | 220945001000027000 | 82743020 | Maize oil with sucrose, vitamins and other ingredients emulsion | Sucrose/Maize Oil/Nicotinamide/Lysine Acetylsalicylate/Ergocalciferol/Calcium Pantothenate/Pyridoxine Hydrochloride/Thiamine Hydrochloride/Riboflavin |  | Emulsion | Oral | 9060700 | | Multivitamin And Multimineral Preparations |
| Niacin |  |  | 14636 | 183235001000027000 | 72875020 | Gentian with thiamine nicotinamide and caffeine tonic | Caffeine/Nicotinamide/Gentian/Thiamine Hydrochloride |  | Tonic | Oral | 9070000 | | Bitters And Tonics |
| Niacin |  |  | 33289 | 7497411000001100 | 74495020 | Solivito N powder for solution for infusion vials (Fresenius Kabi Ltd) | Pyridoxine hydrochloride/Sodium pantothenate/Riboflavin sodium phosphate/Nicotinamide/Biotin/Folic acid/Cyanocobalamin/Sodium ascorbate/Thiamine nitrate | 4.9mg + 16.5mg + 4.9mg + 40mg + 60microgram + 400microgram + 5microgram + 113mg + 3.1mg | Powder for solution for infusion | Intravenous | 9030000 | | Intravenous Nutrition |
| Niacin |  |  | 13690 | 210915001000027000 | 79601020 | Vitamins b complex & c with folic acid tablets | Nicotinamide/Biotin/Cyanocobalamin/Thiamine Nitrate/Pantothenic Acid/Ascorbic Acid/Riboflavin/Folic Acid |  | Tablets | Oral | 9060700 | | Multivitamin And Multimineral Preparations |
| Niacin |  |  | 32186 | 8137911000001100 | 88855020 | Ironorm capsules (Wallace Manufacturing Chemists Ltd) | Ferrous sulfate dried/Folic acid/Thiamine hydrochloride/Riboflavin/Ascorbic acid/Nicotinamide | 195mg + 1.7mg + 1mg + 2mg + 15mg + 10mg | Capsule | Oral | 09010000/09040251 | | Anaemias And Some Other Blood Disorders/Nutritional Supplements |
| Niacin |  |  | 8533 | 1625001000027100 | 48193020 | Apisate Tablet (Wyeth Pharmaceuticals) | Diethylpropion Hydrochloride/Nicotinamide/Pyridoxine Hydrochloride/Riboflavin/Thiamine Hydrochloride |  | Tablet | Oral | 4050200 | | Centrally Acting Apetite Suppressants |
| Niacin |  |  | 17244 | 34405001000027100 | 52272020 | Villescon Liquid (Boehringer Ingelheim Ltd) | Nicotinamide/Pyridoxine Hydrochloride/Thiamine Hydrochloride/Riboflavin Sodium Phosphate/Prolintane |  | Liquid | Oral | 4040000 | | CNS Stimulants And Drugs Used For Attention Deficit Hyperactivity Disorder |
| Niacin |  |  | 3037 | 23005001000027100 | 50899020 | Orovite Tablet (Thornton & Ross Ltd) | Nicotinamide/Pyridoxine Hydrochloride/Thiamine Hydrochloride/Ascorbic Acid/Riboflavin |  | Tablet | Oral | 9060750 | | - |
| Niacin |  |  | 31595 | 214455001000027000 | 80734020 | Dialyvit with zinc Tablet (Vitaline Pharmaceuticals UK Ltd) | Nicotinamide/Zinc Acetate/Biotin/Cyanocobalamin/Pyridoxine Hydrochloride/Thiamine Nitrate/Pantothenic Acid/Ascorbic Acid/Riboflavin/Folic Acid |  | Tablet | Oral | 9060700 | | Multivitamin And Multimineral Preparations |
| Niacin |  |  | 16000 | 86425001000027100 | 58907020 | Centrum select 50+ Tablet (Wyeth Consumer Healthcare) | Biotin/Sodium Molybdate/Ascorbic Acid/Calcium Pantothenate/Copper Sulphate/Folic Acid/Ferrous Fumarate/Magnesium Oxide/Manganese Sulphate/Nicotinamide/Potassium Chloride/Potassium Iodide/Riboflavin/Pyridoxine/Alpha Tocopherol/Vitamin A/Vitamin |  | Tablet | Oral | 9060750 | | - |
| Niacin |  |  | 19239 | 180595001000027000 | 72393020 | Multivitamins with minerals and trace elements Tablet | Biotin/Sodium Molybdate/Ascorbic Acid/Calcium Pantothenate/Copper Sulphate/Folic Acid/Ferrous Fumarate/Magnesium Oxide/Manganese Sulphate/Nicotinamide/Potassium Chloride/Potassium Iodide/Riboflavin/Pyridoxine/Alpha Tocopherol/Vitamin A/Vitamin |  | Tablet | Oral | 9060750 | | - |
| Niacin |  |  | 22570 | 10715001000027100 | 49341020 | Estradurin 40mg Injection (Pharmacia Ltd) | Mepivacaine Hydrochloride/Nicotinamide/Polyestradiol Phosphate | 40mg | Injection |  | 8030100 | | Oestrogens (In Malignant Disease) |
| Niacin |  |  | 74344 | 34247911000001100 | 75831021 | Freederm Treatment 4% gel (Dendron Ltd) | Nicotinamide | 40mg/1gram | Gel | Cutaneous | 13060104 | | Other Topical Preparations For Acne |
| Niacin |  |  | 33892 | 203145001000027000 | 77111020 | Multivitamins with minerals and trace elements (50with) Tablet | Biotin/Sodium Molybdate/Ascorbic Acid/Calcium Pantothenate/Copper Sulphate/Folic Acid/Ferrous Fumarate/Magnesium Oxide/Manganese Sulphate/Nicotinamide/Potassium Chloride/Potassium Iodide/Riboflavin/Pyridoxine/Alpha Tocopherol/Vitamin A/Vitamin |  | Tablet | Oral | 9060750 | | - |
| Niacin |  |  | 14077 | 4170711000001100 | 84594020 | Vivioptal capsules (Bausch & Lomb UK Ltd) | L-Lysine monohydrochloride/Adenosine/Sodium molybdate anhydrous/Biotin/Colecalciferol/Choline hydrogen tartrate/Cobaltous sulfate monohydrate/Copper sulfate monohydrate/Cyanocobalamin/Dexpanthenol/Calcium hydrogen phosphate anhydrous/Ferrous sulfate dried/Folic acid/Magnesium glycerophosphate/Inositol/Lecithin/Ethyl linoleate/Manganese sulfate monohydrate/Nicotinamide/Orotic acid anhydrous/Potassium sulfate/Pyridoxine hydrochloride/Riboflavin/Rutoside/Thiamine nitrate/Vitamin A palmitate/Calcium ascorbate/Alpha tocopheryl acetate/Zinc oxide | 25mg + 750microgram + 80microgram + 50microgram + 400unit + 50mg + 100microgram + 500microgram + 3microgram + 10mg + 35mg + 10mg + 400microgram + 40mg + 30mg + 60mg + 28mg + 500microgram + 25mg + 30mg + 8mg + 6.08mg + 3mg + 20mg + 5mg + 5000unit + 60mg + 10mg + 500microgram | Capsule | Oral | 9060700 | | Multivitamin And Multimineral Preparations |
| Niacin |  |  | 56216 | 5897011000001100 | 35543020 | Vitamins capsules (A A H Pharmaceuticals Ltd) | Vitamin D/Vitamin A/Thiamine hydrochloride/Riboflavin/Nicotinamide/Ascorbic acid | 300unit + 2500unit + 1mg + 500microgram + 7.5mg + 15mg | Capsule | Oral | 9060700 | | Multivitamin And Multimineral Preparations |
| Niacin |  |  | 29380 | 8114111000001100 | 81665020 | Yeast-Vite tablets (Teva UK Ltd) | Caffeine/Nicotinamide/Thiamine hydrochloride/Riboflavin | 50mg + 1.75mg + 167microgram + 167microgram | Tablet | Oral | 9060000 | | Vitamins |
| Niacin |  |  | 41401 | 109935001000027000 | 62439020 | Vitamin bpc Capsule (Select) | Vitamin D/Vitamin A/Thiamine hydrochloride/Riboflavin/Nicotinamide/Ascorbic acid | 300unit + 2500unit + 1mg + 500microgram + 7.5mg + 15mg | Capsule | Oral | 9060700 | | Multivitamin And Multimineral Preparations |
| Niacin |  |  | 16132 | 9210411000001100 | 89122020 | Freederm 4% gel (Dendron Ltd) | Nicotinamide | 40mg/1gram | Gel | Cutaneous | 13060104 | | Other Topical Preparations For Acne |
| Niacin |  |  | 25315 | 51865001000027100 | 54497020 | Vitamin Capsule (Numark Management Ltd) | Vitamin D/Vitamin A/Thiamine hydrochloride/Riboflavin/Nicotinamide/Ascorbic acid | 300unit + 2500unit + 1mg + 500microgram + 7.5mg + 15mg | Capsule | Oral | 9060700 | | Multivitamin And Multimineral Preparations |
| Niacin |  |  | 39691 | 256335001000027000 | 96463020 | Minadex multivitamin Oral solution (Seven Seas Ltd) | Cod Liver Oil/Nicotinamide/Pyridoxine Hydrochloride/Thiamine Hydrochloride/Vitamin A/Vitamin D/Ascorbic Acid/Riboflavin Sodium Phosphate/Alpha Tocopheryl Acetate |  | Oral Solution | Oral | 9060750 | | - |
| Niacin |  |  | 74090 | 8063911000001100 | 18732020 | Generic Forceval Junior capsules | Betacarotene/Ergocalciferol/Thiamine/Riboflavin/Pyridoxine/Cyanocobalamin/Ascorbic acid/Alpha tocopheryl acetate/D-biotin/Nicotinamide/Pantothenic acid/Phytomenadione/Folic acid/Iron/Copper/Magnesium/Zinc/Iodine/Manganese/Selenium/Chromium/Molybdenum | 1250unit + 200unit + 1.5mg + 1mg + 1mg + 2microgram + 25mg + 5mg + 50microgram + 7.5mg + 2mg + 25microgram + 100microgram + 5mg + 1mg + 1mg + 5mg + 75microgram + 1.25mg + 25microgram + 50microgram + 50microgram | Capsule | Oral | 9060700 | | Multivitamin And Multimineral Preparations |
| Niacin |  |  | 23072 | 205605001000027000 | 77761020 | Perfectil Capsule (Vitabiotics Ltd) | Biotin/Ascorbic Acid/Cyanocobalamin/Cysteine/Calcium Pantothenate/Copper Sulphate/Folic Acid/Ferrous Fumarate/Magnesium Oxide/Manganese Sulphate/Nicotinamide/Potassium Iodide/Pyridoxine Hydrochloride/Riboflavin/Alpha Tocopherol/Zinc Sulphate/Co |  | Capsule | Oral | 9060750 | | - |
| Niacin |  |  | 3617 | 3363511000001100 | 50042020 | Ketovite tablets (Essential Pharmaceuticals Ltd) | Ascorbic acid/Riboflavin/Thiamine hydrochloride/Pyridoxine hydrochloride/Nicotinamide/Calcium pantothenate/Alpha tocopheryl acetate/Inositol/Biotin/Folic acid/Acetomenaphthone | 16.6mg + 1mg + 1mg + 330microgram + 3.3mg + 1.16mg + 5mg + 50mg + 170microgram + 250microgram + 500microgram | Tablet | Oral | 9060700 | | Multivitamin And Multimineral Preparations |
| Niacin |  |  | 47451 | 8085911000001100 | 69957020 | Calcimax syrup (Wallace Manufacturing Chemists Ltd) | Calcium levulinate/Calcium chloride dihydrate/Nicotinamide/Riboflavin/Thiamine hydrochloride/Pyridoxine hydrochloride/Ascorbic acid/Calcium pantothenate | 70mg/1ml + 24mg/1ml + 400microgram/1ml + 25microgram/1ml + 100microgram/1ml + 25microgram/1ml + 1mg/1ml + 25microgram/1ml | Oral solution | Oral | 9040251 | | Nutritional Supplements |
| Niacin |  |  | 21332 | 218145001000027000 | 81933020 | Iron jelloids Tablet (SSL International Plc) | Nicotinamide/Thiamine Nitrate/Ferrous Fumarate/Ascorbic Acid/Riboflavin |  | Tablet | Oral | 09010101/09060700 | | Oral Iron/Multivitamin And Multimineral Preparations |
| Niacin |  |  | 46811 | 13487011000001100 | 95091020 | Quiet Life tablets (G.R. Lane Health Products Ltd) | Motherwort/Wild lettuce dry extract/Hops powder/Nicotinamide/Passion flower/Thiamine hydrochloride/Riboflavin/Valerian root extract | 34mg + 29mg + 75mg + 4.49mg + 58mg + 710microgram + 570microgram + 50mg | Tablet | Oral | 9040251 | | Nutritional Supplements |
| Niacin |  |  | 22386 | 209665001000027000 | 79188020 | Jacksons multivitamin Oral solution (Anglian Pharma Sales and Marketing Ltd) | Ascorbic Acid/Nicotinamide/Riboflavin/Thiamine Hydrochloride/Vitamin A/Vitamin D/Vitamin B12 |  | Oral Solution | Oral | 9060700 | | Multivitamin And Multimineral Preparations |
| Niacin |  |  | 38051 | 2873411000001100 | 66082020 | Vitamins capsules (Kent Pharmaceuticals Ltd) | Vitamin D/Vitamin A/Thiamine hydrochloride/Riboflavin/Nicotinamide/Ascorbic acid | 300unit + 2500unit + 1mg + 500microgram + 7.5mg + 15mg | Capsule | Oral | 9060700 | | Multivitamin And Multimineral Preparations |
| Niacin |  |  | 31047 | 171955001000027000 | 71056020 | Givitol Capsule (Galen Ltd) | Sodium Ascorbate/Nicotinamide/Pyridoxine Hydrochloride/Thiamine Nitrate/Ferrous Fumarate/Riboflavin/Folic Acid |  | Capsule | Oral | 09010101/09060700 | | Oral Iron/Multivitamin And Multimineral Preparations |
| Niacin |  |  | 22557 | 10725001000027100 | 49342020 | Estradurin 80mg Injection (Pharmacia Ltd) | Mepivacaine Hydrochloride/Nicotinamide/Polyestradiol Phosphate | 80mg | Injection |  | 8030100 | | Oestrogens (In Malignant Disease) |
| Niacin |  |  | 58036 | 8139911000001100 | 18811020 | Generic Ironorm capsules | Ferrous sulfate dried/Folic acid/Thiamine hydrochloride/Riboflavin/Ascorbic acid/Nicotinamide | 195mg + 1.7mg + 1mg + 2mg + 15mg + 10mg | Capsule | Oral | 09010000/09040251 | | Anaemias And Some Other Blood Disorders/Nutritional Supplements |
| Niacin |  |  | 39117 | 8064611000001100 | 95881020 | Forceval Junior capsules (Alliance Pharmaceuticals Ltd) | Betacarotene/Ergocalciferol/Thiamine/Riboflavin/Pyridoxine/Cyanocobalamin/Ascorbic acid/Alpha tocopheryl acetate/D-biotin/Nicotinamide/Pantothenic acid/Phytomenadione/Folic acid/Iron/Copper/Magnesium/Zinc/Iodine/Manganese/Selenium/Chromium/Molybdenum | 1250unit + 200unit + 1.5mg + 1mg + 1mg + 2microgram + 25mg + 5mg + 50microgram + 7.5mg + 2mg + 25microgram + 100microgram + 5mg + 1mg + 1mg + 5mg + 75microgram + 1.25mg + 25microgram + 50microgram + 50microgram | Capsule | Oral | 9060700 | | Multivitamin And Multimineral Preparations |
| Niacin |  |  | 40729 | 15871411000001100 | 97431020 | Tredaptive 1000mg/20mg modified-release tablets (Merck Sharp & Dohme Ltd) | Nicotinic acid/Laropiprant | 1gram + 20mg | Modified-release tablet | Oral | 2120500 | | Nicotinic Acid Group |
| Niacin |  |  | 16067 | 207795001000027000 | 78391020 | Sanatogen gold A to Z Tablet (Roche Consumer Health) | Biotin/Sodium Molybdate/Ascorbic Acid/Borax/Silica/Vitamin A Acetate/Calcium Pantothenate/Folic Acid/Ferrous Fumarate/Magnesium Oxide/Nicotinic Acid/Potassium Chloride/Potassium Iodide/Pyridoxine Hydrochloride/Riboflavin/Alpha Tocopherol/Vitami |  | Tablet | Oral | 9060750 | | - |
| Niacin |  |  | 12730 | 221665001000027000 | 82962020 | Vitamin c with vitamins, minerals & other ingredients tablets | Betacarotene/Cyanocobalamin/Iron/Ginkgo Biloba/Ginseng/Pyridoxine Hydrochloride/Thiamine Hydrochloride/Vitamin A/Vitamin D/Pantothenic Acid/Ascorbic Acid/Riboflavin/Potassium/Alpha Tocopherol/Copper/Nicotinic Acid/Folic Acid |  | Tablets | Oral | 09010101/09060700 | | Oral Iron/Multivitamin And Multimineral Preparations |
| Niacin |  |  | 10003 | 207435001000027000 | 78336020 | Menopace Capsule (Vitabiotics Ltd) | Pantothenic Acid/Biotin/Ascorbic Acid/Aminobenzoic Acid/Copper Sulphate/Folic Acid/Ferrous Fumarate/Magnesium Oxide/Manganese Sulphate/Nicotinic Acid/Potassium Iodide/Riboflavin/Pyridoxine/Vitamin A/Zinc Sulphate/Alpha Tocopheryl Hydrogen Succi |  | Capsule | Oral | 9060750 | | - |
| Niacin |  |  | 7551 | 4994211000001100 | 87157020 | Niaspan 1g modified-release tablets (Abbott Laboratories Ltd) | Nicotinic acid | 1gram | Modified-release tablet | Oral | 2120500 | | Nicotinic Acid Group |
| Niacin |  |  | 12211 | 319971003 | 55690020 | Nicotinic acid 50mg tablets | Nicotinic acid | 50mg | Tablet | Oral | 2120500 | | Nicotinic Acid Group |
| Niacin |  |  | 30618 | 220415001000027000 | 82582020 | Estroven Tablet (Estroven Ltd) | Calcium/Folic Acid/Iodine/Nicotinic Acid/Riboflavin/Pyridoxine/Soya Oil/Alpha Tocopherol/Arrowroot/Selenium/Thiamine/Vitamin B12 |  | Tablet | Oral | 9060750 | | - |
| Niacin |  |  | 63343 | 4933311000001100 | 14664020 | Generic Crampex tablets | Colecalciferol/Calcium gluconate/Nicotinic acid | 20microgram + 200mg + 20mg | Tablet | Oral | 10020202 | | Other Muscle Relaxants |
| Niacin |  |  | 15209 | 4917911000001100 | 81338020 | Crampex tablets (Thornton & Ross Ltd) | Colecalciferol/Calcium gluconate/Nicotinic acid | 20microgram + 200mg + 20mg | Tablet | Oral | 10020202 | | Other Muscle Relaxants |
| Niacin |  |  | 18126 | 36031411000001100 | 87151020 | Nicotinic acid 1g modified-release tablets | Nicotinic acid | 1gram | Modified-release tablet | Oral | 0 | | Unknown |
| Niacin |  |  | 17824 | 61405001000027100 | 55689020 | Nicotinic acid 25mg Tablet | Nicotinic Acid | 25mg | Tablet | Oral | 2120500 | | Nicotinic Acid Group |
| Niacin |  |  | 20842 | 218165001000027000 | 81937020 | Phyllosan Tablet (SSL International Plc) | Thiamine Nitrate/Ferrous Fumarate/Ascorbic Acid/Riboflavin/Nicotinic Acid |  | Tablet | Oral | 09010101/09060700 | | Oral Iron/Multivitamin And Multimineral Preparations |
| Niacin |  |  | 14961 | 4186111000001100 | 82697020 | Berocca effervescent tablets orange (Bayer Plc) | Ascorbic acid/Cyanocobalamin/Biotin/Thiamine/Riboflavin/Nicotinic acid/Pyridoxine/Pantothenic acid/Folic acid/Calcium/Magnesium/Zinc | 476mg + 8.6microgram + 130microgram + 10.4mg + 13.6mg + 45.3mg + 7.1mg + 22.7mg + 366microgram + 95mg + 95mg + 9mg | Effervescent tablet | Oral | 9040251 | | Nutritional Supplements |
| Niacin |  |  | 60342 | 23164211000001100 | 17495021 | Berocca effervescent tablets tropical (Bayer Plc) | Ascorbic acid/Cyanocobalamin/Biotin/Thiamine/Riboflavin/Nicotinic acid/Pyridoxine/Pantothenic acid/Folic acid/Calcium/Magnesium/Zinc | 476mg + 8.6microgram + 130microgram + 10.4mg + 13.6mg + 45.3mg + 7.1mg + 22.7mg + 366microgram + 95mg + 95mg + 9mg | Effervescent tablet | Oral | 9040251 | | Nutritional Supplements |
| Niacin |  |  | 17813 | 61415001000027100 | 55691020 | Nicotinic acid 100mg Tablet | Nicotinic Acid | 100mg | Tablet | Oral | 2120500 | | Nicotinic Acid Group |
| Niacin |  |  | 46958 | 221775001000027000 | 82999020 | Ascorbic acid with other vitamins tablets | Betacarotene/Biotin/Cyanocobalamin/Thiamine Nitrate/Vitamin A/Vitamin D/Ascorbic Acid/Riboflavin/Alpha Tocopherol/Selenium/Nicotinic Acid/Folic Acid |  | Tablets | Oral | 9060700 | | Multivitamin And Multimineral Preparations |
| Niacin |  |  | 20085 | 221695001000027000 | 82966020 | Sanatogen classic Tablet (Roche Consumer Health) | Betacarotene/Cyanocobalamin/Iron/Ginkgo Biloba/Ginseng/Pyridoxine Hydrochloride/Thiamine Hydrochloride/Vitamin A/Vitamin D/Pantothenic Acid/Ascorbic Acid/Riboflavin/Potassium/Alpha Tocopherol/Copper/Nicotinic Acid/Folic Acid |  | Tablet | Oral | 09010101/09060700 | | Oral Iron/Multivitamin And Multimineral Preparations |
| Niacin |  |  | 7544 | 4993911000001100 | 87155020 | Niaspan 750mg modified-release tablets (Abbott Laboratories Ltd) | Nicotinic acid | 750mg | Modified-release tablet | Oral | 2120500 | | Nicotinic Acid Group |
| Niacin |  |  | 18098 | 236245001000027000 | 87159020 | Nicotinic acid 375mg + 500mg + 750mg Modified-release tablet | Nicotinic Acid | 375mg + 500mg + 750mg | Modified-Release Tablet | Oral | 2120500 | | Nicotinic Acid Group |
| Niacin |  |  | 42190 | 216255001000027000 | 81334020 | Nicotinic acid with colecalciferol and calcium gluconate Tablet | Calcium Gluconate/Colecalciferol/Nicotinic Acid |  | Tablet | Oral | 2060400 | | Peripheral Vasodilators And Related Drugs |
| Niacin |  |  | 36060 | 33435001000027100 | 52144020 | Vitamin a, c & d with 11 other vitamins & 17 minerals (combination no1) tablets | Biotin/Sodium Molybdate/Ascorbic Acid/Borax/Silica/Vitamin A Acetate/Calcium Pantothenate/Folic Acid/Ferrous Fumarate/Magnesium Oxide/Nicotinic Acid/Potassium Chloride/Potassium Iodide/Pyridoxine Hydrochloride/Riboflavin/Alpha Tocopherol/Vitami |  | Tablets | Oral | 9060750 | | - |
| Niacin |  |  | 14127 | 228305001000027000 | 84980020 | Adeks Tablet (Scandipharm) | Betacarotene/Zinc Oxide/Biotin/Cyanocobalamin/Phytomenadione/Pyridoxine/Thiamine/Vitamin A/Pantothenic Acid/Ascorbic Acid/Riboflavin/Alpha Tocopherol/Colecalciferol/Nicotinic Acid/Folic Acid |  | Tablet | Oral | 9060750 | | - |
| Niacin |  |  | 24583 | 36031611000001100 | 87149020 | Nicotinic acid 750mg modified-release tablets | Nicotinic acid | 750mg | Modified-release tablet | Oral | 0 | | Unknown |
| Niacin |  |  | 15940 | 207465001000027000 | 78339020 | Folic acid with multivitamins and minerals Capsule | Ascorbic Acid/Copper/Folic Acid/Iodine/Iron/Magnesium/Nicotinic Acid/Riboflavin/Pyridoxine/Soya Oil/Vitamin D/Zinc/Alpha Tocopheryl Hydrogen Succinate/Selenium/Beta Carotene/Vitamin K/Thiamine/Vitamin B12 |  | Capsule | Oral | 9060750 | | - |
| Niacin |  |  | 43259 | 228315001000027000 | 84986020 | Vitamin a, c & d with 11 other vitamins & 1 mineral (combination no1) tabs | Betacarotene/Zinc Oxide/Biotin/Cyanocobalamin/Phytomenadione/Pyridoxine/Thiamine/Vitamin A/Pantothenic Acid/Ascorbic Acid/Riboflavin/Alpha Tocopherol/Colecalciferol/Nicotinic Acid/Folic Acid |  | Tablets | Oral | 9060750 | | - |
| Niacin |  |  | 11976 | 4993311000001100 | 87153020 | Niaspan 500mg modified-release tablets (Abbott Laboratories Ltd) | Nicotinic acid | 500mg | Modified-release tablet | Oral | 2120500 | | Nicotinic Acid Group |
| Niacin |  |  | 21296 | 220775001000027000 | 82695020 | Ascorbic acid with Calcium with Vitamin B complex effervescent tablets | Biotin/Hydroxocobalamin/Pyridoxine Hydrochloride/Thiamine Hydrochloride/Pantothenic Acid/Ascorbic Acid/Riboflavin/Calcium/Magnesium/Zinc/Nicotinic Acid |  | Effervescent Tablet | Oral | 09050101/09060200 | | Calcium Supplements/Vitamin B Group |
| Niacin |  |  | 40885 | 15914911000001100 | 95585020 | Nicotinic acid 1g / Laropiprant 20mg modified-release tablets | Nicotinic acid/Laropiprant | 1gram + 20mg | Modified-release tablet | Oral | 2120500 | | Nicotinic Acid Group |
| Niacin |  |  | 14963 | 36031511000001100 | 87147020 | Nicotinic acid 500mg modified-release tablets | Nicotinic acid | 500mg | Modified-release tablet | Oral | 2120500 | | Nicotinic Acid Group |
| Niacin |  |  | 21924 | 215725001000027000 | 81123020 | Acetomenapthone 7mg / Nicotinic acid 25mg tablets | Nicotinic Acid/Acetomenaphthone | 7mg + 25mg | Tablets | Oral | 2060400 | | Peripheral Vasodilators And Related Drugs |
| Novel |  | Lomitapide | 67883 | 23604611000001100 | 20726021 | Lomitapide 5mg capsules | Lomitapide | 5mg | Capsule | Oral | 2120700 | | Other Lipid-Regulating Drugs |
| Omega-3 FA |  |  | 55971 | 22024211000001100 | 47722020 | Prestylon 1g capsules (Teva UK Ltd) | Eicosapentaenoic acid/Docosahexaenoic acid | 460mg + 380mg | Capsule | Oral | 2120600 | | Omega-3 Fatty Acid Compounds |
| Omega-3 FA |  |  | 57234 | 19618711000001100 | 13977020 | Omacor capsules (DE Pharmaceuticals) | Eicosapentaenoic acid/Docosahexaenoic acid | 460mg + 380mg | Capsule | Oral | 2120600 | | Omega-3 Fatty Acid Compounds |
| Omega-3 FA |  |  | 57583 | 19812911000001100 | 39018020 | Eicosapentaenoic acid 460mg / Docosahexaenoic acid 380mg capsules (Huxley Europe Ltd) | Eicosapentaenoic acid/Docosahexaenoic acid | 460mg + 380mg | Capsule | Oral | 2120600 | | Omega-3 Fatty Acid Compounds |
| Omega-3 FA |  |  | 61269 | 24096011000001100 | 23185021 | Nebbaro 1000mg capsules (Zentiva) | Eicosapentaenoic acid/Docosahexaenoic acid | 460mg + 380mg | Capsule | Oral | 2120600 | | Omega-3 Fatty Acid Compounds |
| Omega-3 FA |  |  | 58655 | 23304211000001100 | 17858021 | Omega 3-acid-ethyl esters 1000mg capsules (Glenmark Pharmaceuticals Europe Ltd) | Eicosapentaenoic acid/Docosahexaenoic acid | 460mg + 380mg | Capsule | Oral | 2120600 | | Omega-3 Fatty Acid Compounds |
| Omega-3 FA |  |  | 2662 | 2838911000001100 | 59580020 | MaxEPA 1g capsules (Seven Seas Ltd) | Eicosapentaenoic acid/Docosahexaenoic acid | 170mg + 115mg | Capsule | Oral | 2120600 | | Omega-3 Fatty Acid Compounds |
| Omega-3 FA |  |  | 56426 | 21393711000001100 | 45222020 | Teromeg 1000mg capsules (Advanz Pharma) | Eicosapentaenoic acid/Docosahexaenoic acid | 460mg + 380mg | Capsule | Oral | 2120600 | | Omega-3 Fatty Acid Compounds |
| Omega-3 FA |  |  | 74035 | 10538311000001100 | 2429020 | MaxEPA 1g capsules (Waymade Healthcare Plc) | Eicosapentaenoic acid/Docosahexaenoic acid | 170mg + 115mg | Capsule | Oral | 2120600 | | Omega-3 Fatty Acid Compounds |
| Omega-3 FA |  |  | 14037 | 319978009 | 67932020 | Eicosapentaenoic acid 170mg / Docosahexaenoic acid 115mg capsules | Eicosapentaenoic acid/Docosahexaenoic acid | 170mg + 115mg | Capsule | Oral | 2120600 | | Omega-3 Fatty Acid Compounds |
| Omega-3 FA |  |  | 3204 | 279311000001109 | 59581020 | MaxEPA liquid (Seven Seas Ltd) | Eicosapentaenoic acid/Docosahexaenoic acid | 170mg/1gram + 115mg/1gram | Liquid | Oral | 2120600 | | Omega-3 Fatty Acid Compounds |
| Omega-3 FA |  |  | 23956 | 91235001000027100 | 59582020 | Maxepa Liquid (Seven Seas Ltd) | Alpha Tocopheryl Acetate/Eicosapentaenoic Acid/Docosahexaenoic Acid |  | Liquid | Oral | 2120600 | | Omega-3 Fatty Acid Compounds |
| Omega-3 FA |  |  | 61523 | 24658511000001100 | 27047021 | Omega 3 1000mg capsules (Alissa Healthcare Research Ltd) | Eicosapentaenoic acid/Docosahexaenoic acid | 460mg + 380mg | Capsule | Oral | 2120600 | | Omega-3 Fatty Acid Compounds |
| Omega-3 FA |  |  | 72032 | 34185311000001100 | 75176021 | G & G Omega 3 1000mg softgels capsules (G & G Food Supplies Ltd) | Eicosapentaenoic acid/Docosahexaenoic acid | 460mg + 380mg | Capsule | Oral | 2120600 | | Omega-3 Fatty Acid Compounds |
| Omega-3 FA |  |  | 6024 | 4339911000001100 | 76856020 | Eicosapentaenoic acid 460mg / Docosahexaenoic acid 380mg capsules | Eicosapentaenoic acid/Docosahexaenoic acid | 460mg + 380mg | Capsule | Oral | 2120600 | | Omega-3 Fatty Acid Compounds |
| Omega-3 FA |  |  | 6572 | 4334511000001100 | 82855020 | Omacor capsules (Mylan) | Eicosapentaenoic acid/Docosahexaenoic acid | 460mg + 380mg | Capsule | Oral | 2120600 | | Omega-3 Fatty Acid Compounds |
| Omega-3 FA |  |  | 75276 | 28800211000001100 | 44963021 | Dualtis 1000mg capsules (Mylan) | Eicosapentaenoic acid/Docosahexaenoic acid | 460mg + 380mg | Capsule | Oral | 2120600 | | Omega-3 Fatty Acid Compounds |
| PCSK9i |  | Alirocumab | 70673 | 30919311000001100 | 60217021 | Alirocumab 75mg/1ml solution for injection pre-filled disposable devices | Alirocumab | 75mg/1ml | Solution for injection | Subcutaneous | 2120700 | | Other Lipid-Regulating Drugs |
| PCSK9i |  | Alirocumab | 71793 | 30919211000001100 | 60215021 | Alirocumab 150mg/1ml solution for injection pre-filled disposable devices | Alirocumab | 150mg/1ml | Solution for injection | Subcutaneous | 2120700 | | Other Lipid-Regulating Drugs |
| PCSK9i |  | Evolocumab | 70580 | 30738011000001100 | 54195021 | Evolocumab 140mg/1ml solution for injection pre-filled disposable devices | Evolocumab | 140mg/1ml | Solution for injection | Subcutaneous | 2120700 | | Other Lipid-Regulating Drugs |
| PCSK9i |  | Evolocumab | 70397 | 30664511000001100 | 54198021 | Repatha 140mg/1ml solution for injection pre-filled syringes (Amgen Ltd) | Evolocumab | 140mg/1ml | Solution for injection | Subcutaneous | 2120700 | | Other Lipid-Regulating Drugs |
| PCSK9i |  | Evolocumab | 74346 | 30738111000001100 | 54197021 | Evolocumab 140mg/1ml solution for injection pre-filled syringes | Evolocumab | 140mg/1ml | Solution for injection | Subcutaneous | 2120700 | | Other Lipid-Regulating Drugs |
| PCSK9i |  | Evolocumab | 74067 | 30663811000001100 | 54196021 | Repatha SureClick 140mg/1ml solution for injection pre-filled pens (Amgen Ltd) | Evolocumab | 140mg/1ml | Solution for injection | Subcutaneous | 2120700 | | Other Lipid-Regulating Drugs |
| Statins | Atorvastatin |  | 65193 | 22940911000001100 | 17407021 | Atorvastatin 20mg tablets (Ranbaxy (UK) Ltd) | Atorvastatin calcium trihydrate | 20mg | Tablet | Oral | 2120400 | | Statins |
| Statins | Atorvastatin |  | 63140 | 20507911000001100 | 41341020 | Atorvastatin 10mg tablets (Alliance Healthcare (Distribution) Ltd) | Atorvastatin calcium trihydrate | 10mg | Tablet | Oral | 2120400 | | Statins |
| Statins | Atorvastatin |  | 69093 | 20573911000001100 | 41890020 | Atorvastatin 80mg tablets (Wockhardt UK Ltd) | Atorvastatin calcium trihydrate | 80mg | Tablet | Oral | 2120400 | | Statins |
| Statins | Atorvastatin |  | 55034 | 14158911000001100 | 35417020 | Atorvastatin 40mg/5ml oral suspension | Atorvastatin calcium trihydrate | 8mg/1ml | Oral suspension | Oral | 2120400 | | Statins |
| Statins | Atorvastatin |  | 51200 | 20570211000001100 | 41905020 | Atorvastatin 40mg tablets (Arrow Generics Ltd) | Atorvastatin calcium trihydrate | 40mg | Tablet | Oral | 2120400 | | Statins |
| Statins | Atorvastatin |  | 7374 | 232011000001102 | 83954020 | Lipitor 20mg tablets (Pfizer Ltd) | Atorvastatin calcium trihydrate | 20mg | Tablet | Oral | 2120400 | | Statins |
| Statins | Atorvastatin |  | 5775 | 134489001 | 81727020 | Atorvastatin 80mg tablets | Atorvastatin calcium trihydrate | 80mg | Tablet | Oral | 2120400 | | Statins |
| Statins | Atorvastatin |  | 64825 | 22201511000001100 | 14784021 | Atorvastatin 10mg tablets (Phoenix Healthcare Distribution Ltd) | Atorvastatin calcium trihydrate | 10mg | Tablet | Oral | 2120400 | | Statins |
| Statins | Atorvastatin |  | 57834 | 22613211000001100 | 16680021 | Atorvastatin 40mg tablets (DE Pharmaceuticals) | Atorvastatin calcium trihydrate | 40mg | Tablet | Oral | 2120400 | | Statins |
| Statins | Atorvastatin |  | 53772 | 20508511000001100 | 41292020 | Atorvastatin 80mg tablets (Alliance Healthcare (Distribution) Ltd) | Atorvastatin calcium trihydrate | 80mg | Tablet | Oral | 2120400 | | Statins |
| Statins | Atorvastatin |  | 67573 | 22612811000001100 | 16674021 | Atorvastatin 10mg tablets (DE Pharmaceuticals) | Atorvastatin calcium trihydrate | 10mg | Tablet | Oral | 2120400 | | Statins |
| Statins | Atorvastatin |  | 49751 | 20508311000001100 | 41330020 | Atorvastatin 40mg tablets (Alliance Healthcare (Distribution) Ltd) | Atorvastatin calcium trihydrate | 40mg | Tablet | Oral | 2120400 | | Statins |
| Statins | Atorvastatin |  | 48518 | 14158611000001100 | 35411020 | Atorvastatin 10mg/5ml oral solution | Atorvastatin calcium trihydrate | 2mg/1ml | Oral solution | Oral | 2120400 | | Statins |
| Statins | Atorvastatin |  | 55727 | 20482711000001100 | 41337020 | Atorvastatin 10mg tablets (Actavis UK Ltd) | Atorvastatin calcium trihydrate | 10mg | Tablet | Oral | 2120400 | | Statins |
| Statins | Atorvastatin |  | 55032 | 20448211000001100 | 41336020 | Atorvastatin 10mg tablets (Dexcel-Pharma Ltd) | Atorvastatin calcium trihydrate | 10mg | Tablet | Oral | 2120400 | | Statins |
| Statins | Atorvastatin |  | 60607 | 22613511000001100 | 16641021 | Atorvastatin 80mg tablets (DE Pharmaceuticals) | Atorvastatin calcium trihydrate | 80mg | Tablet | Oral | 2120400 | | Statins |
| Statins | Atorvastatin |  | 50963 | 20494711000001100 | 41328020 | Atorvastatin 40mg tablets (Teva UK Ltd) | Atorvastatin calcium trihydrate | 40mg | Tablet | Oral | 2120400 | | Statins |
| Statins | Atorvastatin |  | 53887 | 20483111000001100 | 41326020 | Atorvastatin 40mg tablets (Accord Healthcare Ltd) | Atorvastatin calcium trihydrate | 40mg | Tablet | Oral | 2120400 | | Statins |
| Statins | Atorvastatin |  | 72213 | 20572711000001100 | 41914020 | Atorvastatin 20mg tablets (Wockhardt UK Ltd) | Atorvastatin calcium trihydrate | 20mg | Tablet | Oral | 2120400 | | Statins |
| Statins | Atorvastatin |  | 17683 | 756111000001109 | 81729020 | Lipitor 80mg tablets (Pfizer Ltd) | Atorvastatin calcium trihydrate | 80mg | Tablet | Oral | 2120400 | | Statins |
| Statins | Atorvastatin |  | 59331 | 13922611000001100 | 2604020 | Lipitor 10mg tablets (DE Pharmaceuticals) | Atorvastatin calcium trihydrate | 10mg | Tablet | Oral | 2120400 | | Statins |
| Statins | Atorvastatin |  | 51622 | 20529611000001100 | 41349020 | Atorvastatin 20mg tablets (Consilient Health Ltd) | Atorvastatin calcium trihydrate | 20mg | Tablet | Oral | 2120400 | | Statins |
| Statins | Atorvastatin |  | 58041 | 20494411000001100 | 41346020 | Atorvastatin 20mg tablets (Teva UK Ltd) | Atorvastatin calcium trihydrate | 20mg | Tablet | Oral | 2120400 | | Statins |
| Statins | Atorvastatin |  | 59446 | 22047711000001100 | 47193020 | Atorvastatin 40mg tablets (Almus Pharmaceuticals Ltd) | Atorvastatin calcium trihydrate | 40mg | Tablet | Oral | 2120400 | | Statins |
| Statins | Atorvastatin |  | 3411 | 643911000001108 | 83953020 | Lipitor 10mg tablets (Pfizer Ltd) | Atorvastatin calcium trihydrate | 10mg | Tablet | Oral | 2120400 | | Statins |
| Statins | Atorvastatin |  | 67660 | 22941511000001100 | 17393021 | Atorvastatin 80mg tablets (Ranbaxy (UK) Ltd) | Atorvastatin calcium trihydrate | 80mg | Tablet | Oral | 2120400 | | Statins |
| Statins | Atorvastatin |  | 54992 | 14158711000001100 | 35413020 | Atorvastatin 10mg/5ml oral suspension | Atorvastatin calcium trihydrate | 2mg/1ml | Oral suspension | Oral | 2120400 | | Statins |
| Statins | Atorvastatin |  | 58834 | 13831111000001100 | 2603020 | Atorvastatin 10mg tablets (DE Pharmaceuticals) | Atorvastatin calcium trihydrate | 10mg | Tablet | Oral | 2120400 | | Statins |
| Statins | Atorvastatin |  | 50236 | 20576911000001100 | 41912020 | Atorvastatin 10mg tablets (Zentiva) | Atorvastatin calcium trihydrate | 10mg | Tablet | Oral | 2120400 | | Statins |
| Statins | Atorvastatin |  | 52397 | 20982611000001100 | 43826020 | Atorvastatin 40mg tablets (Dr Reddy's Laboratories (UK) Ltd) | Atorvastatin calcium trihydrate | 40mg | Tablet | Oral | 2120400 | | Statins |
| Statins | Atorvastatin |  | 58742 | 20570911000001100 | 41889020 | Atorvastatin 80mg tablets (Arrow Generics Ltd) | Atorvastatin calcium trihydrate | 80mg | Tablet | Oral | 2120400 | | Statins |
| Statins | Atorvastatin |  | 2955 | 484211000001108 | 83955020 | Lipitor 40mg tablets (Pfizer Ltd) | Atorvastatin calcium trihydrate | 40mg | Tablet | Oral | 2120400 | | Statins |
| Statins | Atorvastatin |  | 62476 | 22047911000001100 | 47031020 | Atorvastatin 80mg tablets (Almus Pharmaceuticals Ltd) | Atorvastatin calcium trihydrate | 80mg | Tablet | Oral | 2120400 | | Statins |
| Statins | Atorvastatin |  | 75 | 320030001 | 83944020 | Atorvastatin 20mg tablets | Atorvastatin calcium trihydrate | 20mg | Tablet | Oral | 2120400 | | Statins |
| Statins | Atorvastatin |  | 48346 | 20528611000001100 | 41848020 | Atorvastatin 60mg tablets | Atorvastatin calcium trihydrate | 60mg | Tablet | Oral | 2120400 | | Statins |
| Statins | Atorvastatin |  | 54535 | 20977811000001100 | 42166020 | Atorvastatin 10mg tablets (Pfizer Ltd) | Atorvastatin calcium trihydrate | 10mg | Tablet | Oral | 2120400 | | Statins |
| Statins | Atorvastatin |  | 60989 | 22202511000001100 | 14765021 | Atorvastatin 80mg tablets (Phoenix Healthcare Distribution Ltd) | Atorvastatin calcium trihydrate | 80mg | Tablet | Oral | 2120400 | | Statins |
| Statins | Atorvastatin |  | 55444 | 20577411000001100 | 41907020 | Atorvastatin 40mg tablets (Zentiva) | Atorvastatin calcium trihydrate | 40mg | Tablet | Oral | 2120400 | | Statins |
| Statins | Atorvastatin |  | 62429 | 13831511000001100 | 2616020 | Atorvastatin 20mg tablets (DE Pharmaceuticals) | Atorvastatin calcium trihydrate | 20mg | Tablet | Oral | 2120400 | | Statins |
| Statins | Atorvastatin |  | 63469 | 20512911000001100 | 41847020 | Atorvastatin 30mg tablets (Consilient Health Ltd) | Atorvastatin calcium trihydrate | 30mg | Tablet | Oral | 2120400 | | Statins |
| Statins | Atorvastatin |  | 28 | 320029006 | 83943020 | Atorvastatin 10mg tablets | Atorvastatin calcium trihydrate | 10mg | Tablet | Oral | 2120400 | | Statins |
| Statins | Atorvastatin |  | 58110 | 20577211000001100 | 41915020 | Atorvastatin 20mg tablets (Zentiva) | Atorvastatin calcium trihydrate | 20mg | Tablet | Oral | 2120400 | | Statins |
| Statins | Atorvastatin |  | 75622 | 21099411000001100 | 44118020 | Atorvastatin 60mg tablets (A A H Pharmaceuticals Ltd) | Atorvastatin calcium trihydrate | 60mg | Tablet | Oral | 2120400 | | Statins |
| Statins | Atorvastatin |  | 69427 | 33556811000001100 | 70627021 | Atorvastatin 40mg tablets (Mylan) | Atorvastatin calcium trihydrate | 40mg | Tablet | Oral | 2120400 | | Statins |
| Statins | Atorvastatin |  | 50790 | 20448411000001100 | 41343020 | Atorvastatin 20mg tablets (Dexcel-Pharma Ltd) | Atorvastatin calcium trihydrate | 20mg | Tablet | Oral | 2120400 | | Statins |
| Statins | Atorvastatin |  | 56097 | 19722411000001100 | 38784020 | Atorvastatin 10mg chewable tablets sugar free | Atorvastatin calcium trihydrate | 10mg | Chewable tablet | Oral | 2120400 | | Statins |
| Statins | Atorvastatin |  | 50272 | 20978811000001100 | 42161020 | Atorvastatin 40mg tablets (Pfizer Ltd) | Atorvastatin calcium trihydrate | 40mg | Tablet | Oral | 2120400 | | Statins |
| Statins | Atorvastatin |  | 70987 | 20982011000001100 | 43827020 | Atorvastatin 10mg tablets (Dr Reddy's Laboratories (UK) Ltd) | Atorvastatin calcium trihydrate | 10mg | Tablet | Oral | 2120400 | | Statins |
| Statins | Atorvastatin |  | 68023 | 20496111000001100 | 41340020 | Atorvastatin 10mg tablets (Aspire Pharma Ltd) | Atorvastatin calcium trihydrate | 10mg | Tablet | Oral | 2120400 | | Statins |
| Statins | Atorvastatin |  | 52821 | 20982911000001100 | 43806020 | Atorvastatin 80mg tablets (Dr Reddy's Laboratories (UK) Ltd) | Atorvastatin calcium trihydrate | 80mg | Tablet | Oral | 2120400 | | Statins |
| Statins | Atorvastatin |  | 70693 | 29771911000001100 | 52199021 | Atorvastatin 10mg tablets (Sigma Pharmaceuticals Plc) | Atorvastatin calcium trihydrate | 10mg | Tablet | Oral | 2120400 | | Statins |
| Statins | Atorvastatin |  | 53594 | 16507511000001100 | 42020 | Lipitor 80mg tablets (Mawdsley-Brooks & Company Ltd) | Atorvastatin calcium trihydrate | 80mg | Tablet | Oral | 2120400 | | Statins |
| Statins | Atorvastatin |  | 56248 | 14198211000001100 | 2618020 | Atorvastatin 20mg tablets (Sigma Pharmaceuticals Plc) | Atorvastatin calcium trihydrate | 20mg | Tablet | Oral | 2120400 | | Statins |
| Statins | Atorvastatin |  | 50788 | 20978111000001100 | 42167020 | Atorvastatin 20mg tablets (Pfizer Ltd) | Atorvastatin calcium trihydrate | 20mg | Tablet | Oral | 2120400 | | Statins |
| Statins | Atorvastatin |  | 64868 | 29772511000001100 | 52201021 | Atorvastatin 40mg tablets (Sigma Pharmaceuticals Plc) | Atorvastatin calcium trihydrate | 40mg | Tablet | Oral | 2120400 | | Statins |
| Statins | Atorvastatin |  | 75391 | 34682311000001100 | 78125021 | Atorvastatin 80mg/5ml oral suspension | Atorvastatin calcium trihydrate | 16mg/1ml | Oral suspension | Oral | 2120400 | | Statins |
| Statins | Atorvastatin |  | 67402 | 32395011000001100 | 62259021 | Atorvastatin 40mg tablets (Kent Pharmaceuticals Ltd) | Atorvastatin calcium trihydrate | 40mg | Tablet | Oral | 2120400 | | Statins |
| Statins | Atorvastatin |  | 57348 | 20529411000001100 | 41342020 | Atorvastatin 10mg tablets (Consilient Health Ltd) | Atorvastatin calcium trihydrate | 10mg | Tablet | Oral | 2120400 | | Statins |
| Statins | Atorvastatin |  | 68827 | 33556611000001100 | 70626021 | Atorvastatin 20mg tablets (Mylan) | Atorvastatin calcium trihydrate | 20mg | Tablet | Oral | 2120400 | | Statins |
| Statins | Atorvastatin |  | 51134 | 20491711000001100 | 41338020 | Atorvastatin 10mg tablets (A A H Pharmaceuticals Ltd) | Atorvastatin calcium trihydrate | 10mg | Tablet | Oral | 2120400 | | Statins |
| Statins | Atorvastatin |  | 58394 | 20508111000001100 | 41348020 | Atorvastatin 20mg tablets (Alliance Healthcare (Distribution) Ltd) | Atorvastatin calcium trihydrate | 20mg | Tablet | Oral | 2120400 | | Statins |
| Statins | Atorvastatin |  | 59272 | 21779411000001100 | 47179020 | Atorvastatin 20mg tablets (Waymade Healthcare Plc) | Atorvastatin calcium trihydrate | 20mg | Tablet | Oral | 2120400 | | Statins |
| Statins | Atorvastatin |  | 67846 | 22047311000001100 | 47178020 | Atorvastatin 10mg tablets (Almus Pharmaceuticals Ltd) | Atorvastatin calcium trihydrate | 10mg | Tablet | Oral | 2120400 | | Statins |
| Statins | Atorvastatin |  | 66963 | 29772911000001100 | 52136021 | Atorvastatin 80mg tablets (Sigma Pharmaceuticals Plc) | Atorvastatin calcium trihydrate | 80mg | Tablet | Oral | 2120400 | | Statins |
| Statins | Atorvastatin |  | 57117 | 21779811000001100 | 47030020 | Atorvastatin 80mg tablets (Waymade Healthcare Plc) | Atorvastatin calcium trihydrate | 80mg | Tablet | Oral | 2120400 | | Statins |
| Statins | Atorvastatin |  | 56165 | 19722511000001100 | 38786020 | Atorvastatin 20mg chewable tablets sugar free | Atorvastatin calcium trihydrate | 20mg | Chewable tablet | Oral | 2120400 | | Statins |
| Statins | Atorvastatin |  | 64702 | 21099211000001100 | 44117020 | Atorvastatin 30mg tablets (A A H Pharmaceuticals Ltd) | Atorvastatin calcium trihydrate | 30mg | Tablet | Oral | 2120400 | | Statins |
| Statins | Atorvastatin |  | 52097 | 20573211000001100 | 41906020 | Atorvastatin 40mg tablets (Wockhardt UK Ltd) | Atorvastatin calcium trihydrate | 40mg | Tablet | Oral | 2120400 | | Statins |
| Statins | Atorvastatin |  | 60464 | 14018311000001100 | 35365020 | Atorvastatin 20mg/5ml oral suspension | Atorvastatin calcium trihydrate | 4mg/1ml | Oral suspension | Oral | 2120400 | | Statins |
| Statins | Atorvastatin |  | 68048 | 22201711000001100 | 14785021 | Atorvastatin 20mg tablets (Phoenix Healthcare Distribution Ltd) | Atorvastatin calcium trihydrate | 20mg | Tablet | Oral | 2120400 | | Statins |
| Statins | Atorvastatin |  | 73520 | 13923011000001100 | 2617020 | Lipitor 20mg tablets (DE Pharmaceuticals) | Atorvastatin calcium trihydrate | 20mg | Tablet | Oral | 2120400 | | Statins |
| Statins | Atorvastatin |  | 53890 | 20979511000001100 | 42148020 | Atorvastatin 80mg tablets (Pfizer Ltd) | Atorvastatin calcium trihydrate | 80mg | Tablet | Oral | 2120400 | | Statins |
| Statins | Atorvastatin |  | 52460 | 20496911000001100 | 41329020 | Atorvastatin 40mg tablets (Aspire Pharma Ltd) | Atorvastatin calcium trihydrate | 40mg | Tablet | Oral | 2120400 | | Statins |
| Statins | Atorvastatin |  | 74518 | 20572511000001100 | 41911020 | Atorvastatin 10mg tablets (Wockhardt UK Ltd) | Atorvastatin calcium trihydrate | 10mg | Tablet | Oral | 2120400 | | Statins |
| Statins | Atorvastatin |  | 47721 | 19719311000001100 | 571021 | Lipitor 10mg chewable tablets (Pfizer Ltd) | Atorvastatin calcium trihydrate | 10mg | Chewable tablet | Oral | 2120400 | | Statins |
| Statins | Atorvastatin |  | 52211 | 20482911000001100 | 41344020 | Atorvastatin 20mg tablets (Accord Healthcare Ltd) | Atorvastatin calcium trihydrate | 20mg | Tablet | Oral | 2120400 | | Statins |
| Statins | Atorvastatin |  | 58418 | 20492611000001100 | 41289020 | Atorvastatin 80mg tablets (A A H Pharmaceuticals Ltd) | Atorvastatin calcium trihydrate | 80mg | Tablet | Oral | 2120400 | | Statins |
| Statins | Atorvastatin |  | 59776 | 20497611000001100 | 41291020 | Atorvastatin 80mg tablets (Aspire Pharma Ltd) | Atorvastatin calcium trihydrate | 80mg | Tablet | Oral | 2120400 | | Statins |
| Statins | Atorvastatin |  | 72641 | 14158811000001100 | 35415020 | Atorvastatin 40mg/5ml oral solution | Atorvastatin calcium trihydrate | 8mg/1ml | Oral solution | Oral | 2120400 | | Statins |
| Statins | Atorvastatin |  | 52398 | 20492311000001100 | 41327020 | Atorvastatin 40mg tablets (A A H Pharmaceuticals Ltd) | Atorvastatin calcium trihydrate | 40mg | Tablet | Oral | 2120400 | | Statins |
| Statins | Atorvastatin |  | 56841 | 20448611000001100 | 41325020 | Atorvastatin 40mg tablets (Dexcel-Pharma Ltd) | Atorvastatin calcium trihydrate | 40mg | Tablet | Oral | 2120400 | | Statins |
| Statins | Atorvastatin |  | 58868 | 14197911000001100 | 2605020 | Atorvastatin 10mg tablets (Sigma Pharmaceuticals Plc) | Atorvastatin calcium trihydrate | 10mg | Tablet | Oral | 2120400 | | Statins |
| Statins | Atorvastatin |  | 72164 | 34961811000001100 | 78966021 | Atorvastatin 20mg tablets (Bristol Laboratories Ltd) | Atorvastatin calcium trihydrate | 20mg | Tablet | Oral | 2120400 | | Statins |
| Statins | Atorvastatin |  | 745 | 320031002 | 83945020 | Atorvastatin 40mg tablets | Atorvastatin calcium trihydrate | 40mg | Tablet | Oral | 2120400 | | Statins |
| Statins | Atorvastatin |  | 56564 | 22047511000001100 | 47180020 | Atorvastatin 20mg tablets (Almus Pharmaceuticals Ltd) | Atorvastatin calcium trihydrate | 20mg | Tablet | Oral | 2120400 | | Statins |
| Statins | Atorvastatin |  | 68785 | 33556411000001100 | 70625021 | Atorvastatin 10mg tablets (Mylan) | Atorvastatin calcium trihydrate | 10mg | Tablet | Oral | 2120400 | | Statins |
| Statins | Atorvastatin |  | 59357 | 22940511000001100 | 17406021 | Atorvastatin 10mg tablets (Ranbaxy (UK) Ltd) | Atorvastatin calcium trihydrate | 10mg | Tablet | Oral | 2120400 | | Statins |
| Statins | Atorvastatin |  | 63249 | 20513411000001100 | 41293020 | Atorvastatin 80mg tablets (Consilient Health Ltd) | Atorvastatin calcium trihydrate | 80mg | Tablet | Oral | 2120400 | | Statins |
| Statins | Atorvastatin |  | 68467 | 32394811000001100 | 62258021 | Atorvastatin 20mg tablets (Kent Pharmaceuticals Ltd) | Atorvastatin calcium trihydrate | 20mg | Tablet | Oral | 2120400 | | Statins |
| Statins | Atorvastatin |  | 56182 | 20577611000001100 | 41891020 | Atorvastatin 80mg tablets (Zentiva) | Atorvastatin calcium trihydrate | 80mg | Tablet | Oral | 2120400 | | Statins |
| Statins | Atorvastatin |  | 51876 | 20529811000001100 | 41331020 | Atorvastatin 40mg tablets (Consilient Health Ltd) | Atorvastatin calcium trihydrate | 40mg | Tablet | Oral | 2120400 | | Statins |
| Statins | Atorvastatin |  | 71017 | 20982411000001100 | 43828020 | Atorvastatin 20mg tablets (Dr Reddy's Laboratories (UK) Ltd) | Atorvastatin calcium trihydrate | 20mg | Tablet | Oral | 2120400 | | Statins |
| Statins | Atorvastatin |  | 52168 | 20496611000001100 | 41347020 | Atorvastatin 20mg tablets (Aspire Pharma Ltd) | Atorvastatin calcium trihydrate | 20mg | Tablet | Oral | 2120400 | | Statins |
| Statins | Atorvastatin |  | 64067 | 14018211000001100 | 35363020 | Atorvastatin 20mg/5ml oral solution | Atorvastatin calcium trihydrate | 4mg/1ml | Oral solution | Oral | 2120400 | | Statins |
| Statins | Atorvastatin |  | 62219 | 22613011000001100 | 16676021 | Atorvastatin 20mg tablets (DE Pharmaceuticals) | Atorvastatin calcium trihydrate | 20mg | Tablet | Oral | 2120400 | | Statins |
| Statins | Atorvastatin |  | 56016 | 19719611000001100 | 38787020 | Lipitor 20mg chewable tablets (Pfizer Ltd) | Atorvastatin calcium trihydrate | 20mg | Chewable tablet | Oral | 2120400 | | Statins |
| Statins | Atorvastatin |  | 48973 | 20528511000001100 | 41846020 | Atorvastatin 30mg tablets | Atorvastatin calcium trihydrate | 30mg | Tablet | Oral | 2120400 | | Statins |
| Statins | Atorvastatin |  | 49558 | 20491911000001100 | 41345020 | Atorvastatin 20mg tablets (A A H Pharmaceuticals Ltd) | Atorvastatin calcium trihydrate | 20mg | Tablet | Oral | 2120400 | | Statins |
| Statins | Atorvastatin |  | 51359 | 20569511000001100 | 41913020 | Atorvastatin 20mg tablets (Arrow Generics Ltd) | Atorvastatin calcium trihydrate | 20mg | Tablet | Oral | 2120400 | | Statins |
| Statins | Atorvastatin |  | 52459 | 20483311000001100 | 41288020 | Atorvastatin 80mg tablets (Actavis UK Ltd) | Atorvastatin calcium trihydrate | 80mg | Tablet | Oral | 2120400 | | Statins |
| Statins | Atorvastatin |  | 59859 | 20492811000001100 | 41339020 | Atorvastatin 10mg tablets (Teva UK Ltd) | Atorvastatin calcium trihydrate | 10mg | Tablet | Oral | 2120400 | | Statins |
| Statins | Atorvastatin |  | 57836 | 20495411000001100 | 41290020 | Atorvastatin 80mg tablets (Teva UK Ltd) | Atorvastatin calcium trihydrate | 80mg | Tablet | Oral | 2120400 | | Statins |
| Statins | Atorvastatin |  | 64810 | 22202111000001100 | 14786021 | Atorvastatin 40mg tablets (Phoenix Healthcare Distribution Ltd) | Atorvastatin calcium trihydrate | 40mg | Tablet | Oral | 2120400 | | Statins |
| Statins | Atorvastatin |  | 60511 | 22941211000001100 | 17409021 | Atorvastatin 40mg tablets (Ranbaxy (UK) Ltd) | Atorvastatin calcium trihydrate | 40mg | Tablet | Oral | 2120400 | | Statins |
| Statins | Atorvastatin |  | 61149 | 21779211000001100 | 47177020 | Atorvastatin 10mg tablets (Waymade Healthcare Plc) | Atorvastatin calcium trihydrate | 10mg | Tablet | Oral | 2120400 | | Statins |
| Statins | Atorvastatin |  | 47630 | 19719611000001100 | 575021 | Lipitor 20mg chewable tablets (Pfizer Ltd) | Atorvastatin calcium trihydrate | 20mg | Chewable tablet | Oral | 0 | | Unknown |
| Statins | Atorvastatin |  | 47065 | 19722511000001100 | 573021 | Atorvastatin 20mg chewable tablets sugar free | Atorvastatin calcium trihydrate | 20mg | Chewable tablet | Oral | 0 | | Unknown |
| Statins | Atorvastatin |  | 47090 | 19722411000001100 | 569021 | Atorvastatin 10mg chewable tablets sugar free | Atorvastatin calcium trihydrate | 10mg | Chewable tablet | Oral | 0 | | Unknown |
| Statins | Cerivastatin |  | 4961 | 226245001000027000 | 84284020 | Lipobay 300microgram Tablet (Bayer Plc) | Cerivastatin sodium | 300microgram | Tablet | Oral | 2120400 | | Statins |
| Statins | Cerivastatin |  | 9316 | 226235001000027000 | 84283020 | Lipobay 200microgram Tablet (Bayer Plc) | Cerivastatin sodium | 200microgram | Tablet | Oral | 2120400 | | Statins |
| Statins | Cerivastatin |  | 18442 | 201215001000027000 | 76531020 | Lipobay 400microgram Tablet (Bayer Plc) | Cerivastatin sodium | 400microgram | Tablet | Oral | 2120400 | | Statins |
| Statins | Cerivastatin |  | 9315 | 226225001000027000 | 84282020 | Lipobay 100microgram Tablet (Bayer Plc) | Cerivastatin sodium | 100microgram | Tablet | Oral | 2120400 | | Statins |
| Statins | Cerivastatin |  | 420 | 320035006 | 84278020 | Cerivastatin 100microgram tablets | Cerivastatin sodium | 100microgram | Tablet | Oral | 0 | | Unknown |
| Statins | Cerivastatin |  | 53813 | 4535911000001100 | 2294020 | Lipobay 100microgram tablets (Bayer Plc) | Cerivastatin sodium | 100microgram | Tablet | Oral | 0 | | Unknown |
| Statins | Cerivastatin |  | 31658 | 134491009 | 76528020 | Cerivastatin 800microgram tablets | Cerivastatin sodium | 800microgram | Tablet | Oral | 0 | | Unknown |
| Statins | Cerivastatin |  | 62132 | 4538111000001100 | 2623020 | Lipobay 400microgram tablets (Bayer Plc) | Cerivastatin sodium | 400microgram | Tablet | Oral | 0 | | Unknown |
| Statins | Cerivastatin |  | 5009 | 320036007 | 84279020 | Cerivastatin 200microgram tablets | Cerivastatin sodium | 200microgram | Tablet | Oral | 0 | | Unknown |
| Statins | Cerivastatin |  | 58480 | 4566311000001100 | 2622020 | Lipobay 300microgram tablets (Bayer Plc) | Cerivastatin sodium | 300microgram | Tablet | Oral | 0 | | Unknown |
| Statins | Cerivastatin |  | 5251 | 320037003 | 84280020 | Cerivastatin 300microgram tablets | Cerivastatin sodium | 300microgram | Tablet | Oral | 0 | | Unknown |
| Statins | Cerivastatin |  | 55207 | 4537511000001100 | 2387020 | Lipobay 200microgram tablets (Bayer Plc) | Cerivastatin sodium | 200microgram | Tablet | Oral | 0 | | Unknown |
| Statins | Cerivastatin |  | 5278 | 320041004 | 76527020 | Cerivastatin 400microgram tablets | Cerivastatin sodium | 400microgram | Tablet | Oral | 0 | | Unknown |
| Statins | Simvastatin | Fibrate | 70486 | 32169911000001100 | 65937021 | Cholib 145mg/40mg tablets (Mylan) | Fenofibrate/Simvastatin | 145mg + 40mg | Tablet | Oral | 02120300/02120400 | | Fibrates/Statins |
| Statins | Simvastatin | Fibrate | 66505 | 32234311000001100 | 65936021 | Fenofibrate 145mg / Simvastatin 40mg tablets | Fenofibrate/Simvastatin | 145mg + 40mg | Tablet | Oral | 02120300/02120400 | | Fibrates/Statins |
| Statins | Fluvastatin |  | 53770 | 14584511000001100 | 75882020 | Fluvastatin 40mg capsules (A A H Pharmaceuticals Ltd) | Fluvastatin sodium | 40mg | Capsule | Oral | 2120400 | | Statins |
| Statins | Fluvastatin |  | 74085 | 14765111000001100 | 2586020 | Lescol 40mg capsules (Sigma Pharmaceuticals Plc) | Fluvastatin sodium | 40mg | Capsule | Oral | 2120400 | | Statins |
| Statins | Fluvastatin |  | 5985 | 378111000001106 | 79882020 | Lescol XL 80mg tablets (Novartis Pharmaceuticals UK Ltd) | Fluvastatin sodium | 80mg | Modified-release tablet | Oral | 2120400 | | Statins |
| Statins | Fluvastatin |  | 59278 | 14036511000001100 | 75832020 | Fluvastatin 20mg capsules (Zentiva) | Fluvastatin sodium | 20mg | Capsule | Oral | 2120400 | | Statins |
| Statins | Fluvastatin |  | 72308 | 14037111000001100 | 2573020 | Fluvastatin 20mg capsules (Alliance Healthcare (Distribution) Ltd) | Fluvastatin sodium | 20mg | Capsule | Oral | 2120400 | | Statins |
| Statins | Fluvastatin |  | 379 | 320022002 | 75344020 | Fluvastatin 20mg capsules | Fluvastatin sodium | 20mg | Capsule | Oral | 2120400 | | Statins |
| Statins | Fluvastatin |  | 71029 | 20289511000001100 | 40520020 | Fluvastatin 40mg capsules (Sandoz Ltd) | Fluvastatin sodium | 40mg | Capsule | Oral | 2120400 | | Statins |
| Statins | Fluvastatin |  | 11627 | 36566411000001100 | 75346020 | Fluvastatin 80mg modified-release tablets | Fluvastatin sodium | 80mg | Modified-release tablet | Oral | 2120400 | | Statins |
| Statins | Fluvastatin |  | 73383 | 16238111000001100 | 77029020 | Fluvastatin 40mg capsules (Actavis UK Ltd) | Fluvastatin sodium | 40mg | Capsule | Oral | 2120400 | | Statins |
| Statins | Fluvastatin |  | 2137 | 320023007 | 75345020 | Fluvastatin 40mg capsules | Fluvastatin sodium | 40mg | Capsule | Oral | 2120400 | | Statins |
| Statins | Fluvastatin |  | 8380 | 84811000001104 | 75340020 | Lescol 20mg capsules (Novartis Pharmaceuticals UK Ltd) | Fluvastatin sodium | 20mg | Capsule | Oral | 2120400 | | Statins |
| Statins | Fluvastatin |  | 67328 | 16499511000001100 | 2596020 | Lescol XL 80mg tablets (Mawdsley-Brooks & Company Ltd) | Fluvastatin sodium | 80mg | Modified-release tablet | Oral | 2120400 | | Statins |
| Statins | Fluvastatin |  | 9153 | 409611000001108 | 75341020 | Lescol 40mg capsules (Novartis Pharmaceuticals UK Ltd) | Fluvastatin sodium | 40mg | Capsule | Oral | 2120400 | | Statins |
| Statins | Fluvastatin |  | 62148 | 16237911000001100 | 77027020 | Fluvastatin 20mg capsules (Actavis UK Ltd) | Fluvastatin sodium | 20mg | Capsule | Oral | 2120400 | | Statins |
| Statins | Pravastatin |  | 57108 | 21851011000001100 | 47205020 | Pravastatin 40mg tablets (Waymade Healthcare Plc) | Pravastatin sodium | 40mg | Tablet | Oral | 2120400 | | Statins |
| Statins | Pravastatin |  | 63787 | 13761111000001100 | 2539020 | Pravastatin 10mg tablets (Tillomed Laboratories Ltd) | Pravastatin sodium | 10mg | Tablet | Oral | 2120400 | | Statins |
| Statins | Pravastatin |  | 55912 | 8027611000001100 | 2557020 | Pravastatin 40mg tablets (Alliance Healthcare (Distribution) Ltd) | Pravastatin sodium | 40mg | Tablet | Oral | 2120400 | | Statins |
| Statins | Pravastatin |  | 730 | 320013003 | 73783020 | Pravastatin 20mg tablets | Pravastatin sodium | 20mg | Tablet | Oral | 2120400 | | Statins |
| Statins | Pravastatin |  | 62979 | 8099711000001100 | 2558020 | Pravastatin 40mg tablets (Kent Pharmaceuticals Ltd) | Pravastatin sodium | 40mg | Tablet | Oral | 2120400 | | Statins |
| Statins | Pravastatin |  | 1219 | 320014009 | 73784020 | Pravastatin 40mg tablets | Pravastatin sodium | 40mg | Tablet | Oral | 2120400 | | Statins |
| Statins | Pravastatin |  | 47988 | 8113311000001100 | 68735020 | Pravastatin 40mg tablets (Mylan) | Pravastatin sodium | 40mg | Tablet | Oral | 2120400 | | Statins |
| Statins | Pravastatin |  | 56146 | 21850611000001100 | 47203020 | Pravastatin 10mg tablets (Waymade Healthcare Plc) | Pravastatin sodium | 10mg | Tablet | Oral | 2120400 | | Statins |
| Statins | Pravastatin |  | 51676 | 19732111000001100 | 38515020 | Pravastatin 40mg tablets (Medreich Plc) | Pravastatin sodium | 40mg | Tablet | Oral | 2120400 | | Statins |
| Statins | Pravastatin |  | 72048 | 7959111000001100 | 68377020 | Pravastatin 40mg tablets (Actavis UK Ltd) | Pravastatin sodium | 40mg | Tablet | Oral | 2120400 | | Statins |
| Statins | Pravastatin |  | 1223 | 535011000001102 | 73789020 | Lipostat 40mg tablets (Bristol-Myers Squibb Pharmaceuticals Ltd) | Pravastatin sodium | 40mg | Tablet | Oral | 2120400 | | Statins |
| Statins | Pravastatin |  | 63074 | 11410611000001100 | 68446020 | Pravastatin 20mg tablets (PLIVA Pharma Ltd) | Pravastatin sodium | 20mg | Tablet | Oral | 2120400 | | Statins |
| Statins | Pravastatin |  | 72149 | 14957811000001100 | 35881020 | Pravastatin 5mg/5ml oral suspension | Pravastatin sodium | 1mg/1ml | Oral suspension | Oral | 2120400 | | Statins |
| Statins | Pravastatin |  | 50925 | 15174911000001100 | 2542020 | Pravastatin 10mg tablets (Sigma Pharmaceuticals Plc) | Pravastatin sodium | 10mg | Tablet | Oral | 2120400 | | Statins |
| Statins | Pravastatin |  | 56916 | 11410811000001100 | 68450020 | Pravastatin 40mg tablets (PLIVA Pharma Ltd) | Pravastatin sodium | 40mg | Tablet | Oral | 2120400 | | Statins |
| Statins | Pravastatin |  | 59508 | 18465411000001100 | 2554020 | Pravastatin 20mg tablets (Accord Healthcare Ltd) | Pravastatin sodium | 20mg | Tablet | Oral | 2120400 | | Statins |
| Statins | Pravastatin |  | 71015 | 19731611000001100 | 38513020 | Pravastatin 10mg tablets (Medreich Plc) | Pravastatin sodium | 10mg | Tablet | Oral | 2120400 | | Statins |
| Statins | Pravastatin |  | 3690 | 454111000001107 | 73788020 | Lipostat 20mg tablets (Bristol-Myers Squibb Pharmaceuticals Ltd) | Pravastatin sodium | 20mg | Tablet | Oral | 2120400 | | Statins |
| Statins | Pravastatin |  | 54435 | 9807511000001100 | 70097020 | Pravastatin 40mg tablets (Almus Pharmaceuticals Ltd) | Pravastatin sodium | 40mg | Tablet | Oral | 2120400 | | Statins |
| Statins | Pravastatin |  | 54607 | 9806911000001100 | 70094020 | Pravastatin 20mg tablets (Almus Pharmaceuticals Ltd) | Pravastatin sodium | 20mg | Tablet | Oral | 2120400 | | Statins |
| Statins | Pravastatin |  | 56607 | 21850811000001100 | 47204020 | Pravastatin 20mg tablets (Waymade Healthcare Plc) | Pravastatin sodium | 20mg | Tablet | Oral | 2120400 | | Statins |
| Statins | Pravastatin |  | 52755 | 8027311000001100 | 2548020 | Pravastatin 20mg tablets (Alliance Healthcare (Distribution) Ltd) | Pravastatin sodium | 20mg | Tablet | Oral | 2120400 | | Statins |
| Statins | Pravastatin |  | 57296 | 17915711000001100 | 2553020 | Pravastatin 20mg tablets (Phoenix Healthcare Distribution Ltd) | Pravastatin sodium | 20mg | Tablet | Oral | 2120400 | | Statins |
| Statins | Pravastatin |  | 43218 | 7943211000001100 | 68272020 | Pravastatin 10mg tablets (Teva UK Ltd) | Pravastatin sodium | 10mg | Tablet | Oral | 2120400 | | Statins |
| Statins | Pravastatin |  | 34820 | 7977111000001100 | 68205020 | Pravastatin 40mg tablets (A A H Pharmaceuticals Ltd) | Pravastatin sodium | 40mg | Tablet | Oral | 2120400 | | Statins |
| Statins | Pravastatin |  | 67829 | 7998011000001100 | 68340020 | Pravastatin 20mg tablets (Sandoz Ltd) | Pravastatin sodium | 20mg | Tablet | Oral | 2120400 | | Statins |
| Statins | Pravastatin |  | 36377 | 7943411000001100 | 68275020 | Pravastatin 20mg tablets (Teva UK Ltd) | Pravastatin sodium | 20mg | Tablet | Oral | 2120400 | | Statins |
| Statins | Pravastatin |  | 490 | 320012008 | 73782020 | Pravastatin 10mg tablets | Pravastatin sodium | 10mg | Tablet | Oral | 2120400 | | Statins |
| Statins | Pravastatin |  | 56893 | 18465611000001100 | 2564020 | Pravastatin 40mg tablets (Accord Healthcare Ltd) | Pravastatin sodium | 40mg | Tablet | Oral | 2120400 | | Statins |
| Statins | Pravastatin |  | 40382 | 7976911000001100 | 68201020 | Pravastatin 20mg tablets (A A H Pharmaceuticals Ltd) | Pravastatin sodium | 20mg | Tablet | Oral | 2120400 | | Statins |
| Statins | Pravastatin |  | 75826 | 7958811000001100 | 68374020 | Pravastatin 20mg tablets (Actavis UK Ltd) | Pravastatin sodium | 20mg | Tablet | Oral | 2120400 | | Statins |
| Statins | Pravastatin |  | 1221 | 802411000001108 | 73787020 | Lipostat 10mg tablets (Bristol-Myers Squibb Pharmaceuticals Ltd) | Pravastatin sodium | 10mg | Tablet | Oral | 2120400 | | Statins |
| Statins | Pravastatin |  | 61134 | 15175111000001100 | 2552020 | Pravastatin 20mg tablets (Sigma Pharmaceuticals Plc) | Pravastatin sodium | 20mg | Tablet | Oral | 2120400 | | Statins |
| Statins | Pravastatin |  | 57397 | 18465211000001100 | 2544020 | Pravastatin 10mg tablets (Accord Healthcare Ltd) | Pravastatin sodium | 10mg | Tablet | Oral | 2120400 | | Statins |
| Statins | Pravastatin |  | 32921 | 163075001000027000 | 69857020 | Pravastatin 10mg Tablet (Dr Reddy's Laboratories (UK) Ltd) | Pravastatin sodium | 10mg | Tablet | Oral | 2120400 | | Statins |
| Statins | Pravastatin |  | 57137 | 9806311000001100 | 70090020 | Pravastatin 10mg tablets (Almus Pharmaceuticals Ltd) | Pravastatin sodium | 10mg | Tablet | Oral | 2120400 | | Statins |
| Statins | Pravastatin |  | 48097 | 7943611000001100 | 68278020 | Pravastatin 40mg tablets (Teva UK Ltd) | Pravastatin sodium | 40mg | Tablet | Oral | 2120400 | | Statins |
| Statins | Pravastatin |  | 51890 | 19731911000001100 | 38514020 | Pravastatin 20mg tablets (Medreich Plc) | Pravastatin sodium | 20mg | Tablet | Oral | 2120400 | | Statins |
| Statins | Pravastatin |  | 60251 | 7997711000001100 | 68335020 | Pravastatin 10mg tablets (Sandoz Ltd) | Pravastatin sodium | 10mg | Tablet | Oral | 2120400 | | Statins |
| Statins | Pravastatin |  | 56735 | 8113111000001100 | 68731020 | Pravastatin 20mg tablets (Mylan) | Pravastatin sodium | 20mg | Tablet | Oral | 2120400 | | Statins |
| Statins | Pravastatin |  | 68156 | 7976411000001100 | 68196020 | Pravastatin 10mg tablets (A A H Pharmaceuticals Ltd) | Pravastatin sodium | 10mg | Tablet | Oral | 2120400 | | Statins |
| Statins | Rosuvastatin |  | 60160 | 18202311000001100 | 10787020 | Rosuvastatin 5mg tablets (Mawdsley-Brooks & Company Ltd) | Rosuvastatin calcium | 5mg | Tablet | Oral | 2120400 | | Statins |
| Statins | Rosuvastatin |  | 53460 | 13857911000001100 | 10669020 | Crestor 10mg tablets (DE Pharmaceuticals) | Rosuvastatin calcium | 10mg | Tablet | Oral | 2120400 | | Statins |
| Statins | Rosuvastatin |  | 74552 | 35183311000001100 | 79836021 | Rosuvastatin 10mg tablets (Milpharm Ltd) | Rosuvastatin calcium | 10mg | Tablet | Oral | 2120400 | | Statins |
| Statins | Rosuvastatin |  | 17688 | 9747511000001100 | 89883020 | Crestor 5mg tablets (AstraZeneca UK Ltd) | Rosuvastatin calcium | 5mg | Tablet | Oral | 2120400 | | Statins |
| Statins | Rosuvastatin |  | 7554 | 409108001 | 89881020 | Rosuvastatin 5mg tablets | Rosuvastatin calcium | 5mg | Tablet | Oral | 2120400 | | Statins |
| Statins | Rosuvastatin |  | 73025 | 35027811000001100 | 79185021 | Rosuvastatin 20mg tablets (Mylan) | Rosuvastatin calcium | 20mg | Tablet | Oral | 2120400 | | Statins |
| Statins | Rosuvastatin |  | 6213 | 408037007 | 80350020 | Rosuvastatin 20mg tablets | Rosuvastatin calcium | 20mg | Tablet | Oral | 2120400 | | Statins |
| Statins | Rosuvastatin |  | 57763 | 10769311000001100 | 10666020 | Rosuvastatin 10mg tablets (Waymade Healthcare Plc) | Rosuvastatin calcium | 10mg | Tablet | Oral | 2120400 | | Statins |
| Statins | Rosuvastatin |  | 57999 | 16155011000001100 | 10641020 | Crestor 40mg tablets (Lexon (UK) Ltd) | Rosuvastatin calcium | 40mg | Tablet | Oral | 2120400 | | Statins |
| Statins | Rosuvastatin |  | 9930 | 4172111000001100 | 76259020 | Crestor 40mg tablets (AstraZeneca UK Ltd) | Rosuvastatin calcium | 40mg | Tablet | Oral | 2120400 | | Statins |
| Statins | Rosuvastatin |  | 59452 | 12561111000001100 | 10781020 | Rosuvastatin 5mg tablets (Waymade Healthcare Plc) | Rosuvastatin calcium | 5mg | Tablet | Oral | 2120400 | | Statins |
| Statins | Rosuvastatin |  | 59447 | 10513311000001100 | 10674020 | Crestor 20mg tablets (Waymade Healthcare Plc) | Rosuvastatin calcium | 20mg | Tablet | Oral | 2120400 | | Statins |
| Statins | Rosuvastatin |  | 9897 | 408024009 | 76618020 | Rosuvastatin 40mg tablets | Rosuvastatin calcium | 40mg | Tablet | Oral | 2120400 | | Statins |
| Statins | Rosuvastatin |  | 15252 | 4171311000001100 | 76624020 | Crestor 20mg tablets (AstraZeneca UK Ltd) | Rosuvastatin calcium | 20mg | Tablet | Oral | 2120400 | | Statins |
| Statins | Rosuvastatin |  | 7347 | 4171011000001100 | 76621020 | Crestor 10mg tablets (AstraZeneca UK Ltd) | Rosuvastatin calcium | 10mg | Tablet | Oral | 2120400 | | Statins |
| Statins | Rosuvastatin |  | 75971 | 35035911000001100 | 79180021 | Rosuvastatin 10mg tablets (Sandoz Ltd) | Rosuvastatin calcium | 10mg | Tablet | Oral | 2120400 | | Statins |
| Statins | Rosuvastatin |  | 71014 | 11580111000001100 | 10675020 | Rosuvastatin 20mg tablets (Waymade Healthcare Plc) | Rosuvastatin calcium | 20mg | Tablet | Oral | 2120400 | | Statins |
| Statins | Rosuvastatin |  | 70308 | 14212311000001100 | 10678020 | Crestor 20mg tablets (Sigma Pharmaceuticals Plc) | Rosuvastatin calcium | 20mg | Tablet | Oral | 2120400 | | Statins |
| Statins | Rosuvastatin |  | 58617 | 16075311000001100 | 36834020 | Rosuvastatin 20mg/5ml oral suspension | Rosuvastatin calcium | 4mg/1ml | Oral suspension | Oral | 2120400 | | Statins |
| Statins | Rosuvastatin |  | 713 | 408036003 | 85632020 | Rosuvastatin 10mg tablets | Rosuvastatin calcium | 10mg | Tablet | Oral | 2120400 | | Statins |
| Statins | Simvastatin |  | 52098 | 4465611000001100 | 69807020 | Simvastatin 40mg tablets (Ranbaxy (UK) Ltd) | Simvastatin | 40mg | Tablet | Oral | 2120400 | | Statins |
| Statins | Simvastatin |  | 34969 | 4437211000001100 | 65939020 | Simvastatin 40mg tablets (Actavis UK Ltd) | Simvastatin | 40mg | Tablet | Oral | 2120400 | | Statins |
| Statins | Simvastatin |  | 42 | 319996000 | 72487020 | Simvastatin 10mg tablets | Simvastatin | 10mg | Tablet | Oral | 2120400 | | Statins |
| Statins | Simvastatin |  | 61665 | 21899011000001100 | 47199020 | Simvastatin 10mg tablets (Waymade Healthcare Plc) | Simvastatin | 10mg | Tablet | Oral | 2120400 | | Statins |
| Statins | Simvastatin |  | 6168 | 859611000001107 | 72484020 | Zocor 40mg tablets (Merck Sharp & Dohme Ltd) | Simvastatin | 40mg | Tablet | Oral | 2120400 | | Statins |
| Statins | Simvastatin |  | 41657 | 5476111000001100 | 66993020 | Simvastatin 80mg tablets (Teva UK Ltd) | Simvastatin | 80mg | Tablet | Oral | 2120400 | | Statins |
| Statins | Simvastatin |  | 50703 | 18468511000001100 | 2523020 | Simvastatin 40mg tablets (Accord Healthcare Ltd) | Simvastatin | 40mg | Tablet | Oral | 2120400 | | Statins |
| Statins | Simvastatin |  | 32909 | 4579211000001100 | 65854020 | Simvastatin 80mg tablets (A A H Pharmaceuticals Ltd) | Simvastatin | 80mg | Tablet | Oral | 2120400 | | Statins |
| Statins | Simvastatin |  | 13041 | 4896211000001100 | 87025020 | Simvador 10mg tablets (Discovery Pharmaceuticals) | Simvastatin | 10mg | Tablet | Oral | 2120400 | | Statins |
| Statins | Simvastatin |  | 54947 | 9804811000001100 | 71626020 | Simvastatin 20mg tablets (Almus Pharmaceuticals Ltd) | Simvastatin | 20mg | Tablet | Oral | 2120400 | | Statins |
| Statins | Simvastatin |  | 40601 | 4465311000001100 | 69804020 | Simvastatin 20mg tablets (Ranbaxy (UK) Ltd) | Simvastatin | 20mg | Tablet | Oral | 2120400 | | Statins |
| Statins | Simvastatin |  | 47774 | 10413811000001100 | 66058020 | Simvastatin 10mg tablets (Arrow Generics Ltd) | Simvastatin | 10mg | Tablet | Oral | 2120400 | | Statins |
| Statins | Simvastatin |  | 61360 | 9805011000001100 | 71623020 | Simvastatin 10mg tablets (Almus Pharmaceuticals Ltd) | Simvastatin | 10mg | Tablet | Oral | 2120400 | | Statins |
| Statins | Simvastatin |  | 34366 | 4466511000001100 | 65924020 | Simvastatin 20mg tablets (IVAX Pharmaceuticals UK Ltd) | Simvastatin | 20mg | Tablet | Oral | 2120400 | | Statins |
| Statins | Simvastatin |  | 25 | 319997009 | 72488020 | Simvastatin 20mg tablets | Simvastatin | 20mg | Tablet | Oral | 2120400 | | Statins |
| Statins | Simvastatin |  | 52953 | 16066911000001100 | 2506020 | Simvastatin 20mg tablets (Bristol Laboratories Ltd) | Simvastatin | 20mg | Tablet | Oral | 2120400 | | Statins |
| Statins | Simvastatin |  | 48221 | 17369311000001100 | 37402020 | Simvastatin 20mg/5ml oral suspension sugar free | Simvastatin | 4mg/1ml | Oral suspension | Oral | 2120400 | | Statins |
| Statins | Simvastatin |  | 51233 | 4574411000001100 | 2479020 | Simvastatin 10mg tablets (Alliance Healthcare (Distribution) Ltd) | Simvastatin | 10mg | Tablet | Oral | 2120400 | | Statins |
| Statins | Simvastatin |  | 9920 | 4896511000001100 | 87027020 | Simvador 20mg tablets (Discovery Pharmaceuticals) | Simvastatin | 20mg | Tablet | Oral | 2120400 | | Statins |
| Statins | Simvastatin |  | 34907 | 4480711000001100 | 65910020 | Simvastatin 40mg tablets (Wockhardt UK Ltd) | Simvastatin | 40mg | Tablet | Oral | 2120400 | | Statins |
| Statins | Simvastatin |  | 44650 | 11551711000001100 | 66659020 | Simvastatin 40mg tablets (Dexcel-Pharma Ltd) | Simvastatin | 40mg | Tablet | Oral | 2120400 | | Statins |
| Statins | Simvastatin |  | 49587 | 9804011000001100 | 71634020 | Simvastatin 80mg tablets (Almus Pharmaceuticals Ltd) | Simvastatin | 80mg | Tablet | Oral | 2120400 | | Statins |
| Statins | Simvastatin |  | 69413 | 32494811000001100 | 66011021 | Simvastatin 20mg tablets (Brown & Burk UK Ltd) | Simvastatin | 20mg | Tablet | Oral | 2120400 | | Statins |
| Statins | Simvastatin |  | 31930 | 238335001000027000 | 88103020 | Zocor heart-pro 10mg Tablet (McNeil Products Ltd) | Simvastatin | 10mg | Tablet | Oral | 2120400 | | Statins |
| Statins | Simvastatin |  | 53908 | 11551311000001100 | 66652020 | Simvastatin 10mg tablets (Dexcel-Pharma Ltd) | Simvastatin | 10mg | Tablet | Oral | 2120400 | | Statins |
| Statins | Simvastatin |  | 45219 | 4467311000001100 | 65967020 | Simvastatin 40mg tablets (Kent Pharmaceuticals Ltd) | Simvastatin | 40mg | Tablet | Oral | 2120400 | | Statins |
| Statins | Simvastatin |  | 45235 | 4580111000001100 | 66205020 | Simvastatin 20mg tablets (Sandoz Ltd) | Simvastatin | 20mg | Tablet | Oral | 2120400 | | Statins |
| Statins | Simvastatin |  | 51483 | 19197611000001100 | 2511020 | Simvastatin 20mg tablets (Milpharm Ltd) | Simvastatin | 20mg | Tablet | Oral | 2120400 | | Statins |
| Statins | Simvastatin |  | 50754 | 19733411000001100 | 38510020 | Simvastatin 20mg tablets (Medreich Plc) | Simvastatin | 20mg | Tablet | Oral | 2120400 | | Statins |
| Statins | Simvastatin |  | 48078 | 4436811000001100 | 65932020 | Simvastatin 10mg tablets (Actavis UK Ltd) | Simvastatin | 10mg | Tablet | Oral | 2120400 | | Statins |
| Statins | Simvastatin |  | 54655 | 18467811000001100 | 2494020 | Simvastatin 10mg tablets (Accord Healthcare Ltd) | Simvastatin | 10mg | Tablet | Oral | 2120400 | | Statins |
| Statins | Simvastatin |  | 50483 | 10297511000001100 | 2514020 | Simvastatin 40mg tablets (Relonchem Ltd) | Simvastatin | 40mg | Tablet | Oral | 2120400 | | Statins |
| Statins | Simvastatin |  | 58315 | 21899311000001100 | 47200020 | Simvastatin 20mg tablets (Waymade Healthcare Plc) | Simvastatin | 20mg | Tablet | Oral | 2120400 | | Statins |
| Statins | Simvastatin |  | 65679 | 30097511000001100 | 53344021 | Simvastatin 20mg tablets (DE Pharmaceuticals) | Simvastatin | 20mg | Tablet | Oral | 2120400 | | Statins |
| Statins | Simvastatin |  | 802 | 4896711000001100 | 87029020 | Simvador 40mg tablets (Discovery Pharmaceuticals) | Simvastatin | 40mg | Tablet | Oral | 2120400 | | Statins |
| Statins | Simvastatin |  | 57329 | 16091011000001100 | 36882020 | Simvastatin 25mg/5ml oral suspension | Simvastatin | 5mg/1ml | Oral suspension | Oral | 2120400 | | Statins |
| Statins | Simvastatin |  | 53676 | 13763111000001100 | 66326020 | Simvastatin 20mg tablets (Tillomed Laboratories Ltd) | Simvastatin | 20mg | Tablet | Oral | 2120400 | | Statins |
| Statins | Simvastatin |  | 48058 | 4465011000001100 | 69800020 | Simvastatin 10mg tablets (Ranbaxy (UK) Ltd) | Simvastatin | 10mg | Tablet | Oral | 2120400 | | Statins |
| Statins | Simvastatin |  | 22579 | 113211000001106 | 76460020 | Zocor 80mg tablets (Merck Sharp & Dohme Ltd) | Simvastatin | 80mg | Tablet | Oral | 2120400 | | Statins |
| Statins | Simvastatin |  | 61155 | 18758211000001100 | 78014020 | Simvastatin 40mg/5ml oral suspension sugar free (A A H Pharmaceuticals Ltd) | Simvastatin | 8mg/1ml | Oral suspension | Oral | 2120400 | | Statins |
| Statins | Simvastatin |  | 44878 | 7630211000001100 | 88014020 | Ranzolont 10mg tablets (Ranbaxy (UK) Ltd) | Simvastatin | 10mg | Tablet | Oral | 2120400 | | Statins |
| Statins | Simvastatin |  | 34353 | 4464211000001100 | 66045020 | Simvastatin 40mg tablets (Mylan) | Simvastatin | 40mg | Tablet | Oral | 2120400 | | Statins |
| Statins | Simvastatin |  | 34316 | 4380911000001100 | 65879020 | Simvastatin 20mg tablets (Teva UK Ltd) | Simvastatin | 20mg | Tablet | Oral | 2120400 | | Statins |
| Statins | Simvastatin |  | 64968 | 30097311000001100 | 53343021 | Simvastatin 10mg tablets (DE Pharmaceuticals) | Simvastatin | 10mg | Tablet | Oral | 2120400 | | Statins |
| Statins | Simvastatin |  | 53087 | 10618711000001100 | 2502020 | Simvastatin 20mg tablets (Somex Pharma) | Simvastatin | 20mg | Tablet | Oral | 2120400 | | Statins |
| Statins | Simvastatin |  | 50670 | 19197811000001100 | 2524020 | Simvastatin 40mg tablets (Milpharm Ltd) | Simvastatin | 40mg | Tablet | Oral | 2120400 | | Statins |
| Statins | Simvastatin |  | 54266 | 8722111000001100 | 20745020 | Simvastatin 20mg/5ml oral suspension | Simvastatin | 4mg/1ml | Oral suspension | Oral | 2120400 | | Statins |
| Statins | Simvastatin |  | 34879 | 136385001000027000 | 65952020 | Simvastatin 40mg Tablet (Niche Generics Ltd) | Simvastatin | 40mg | Tablet | Oral | 2120400 | | Statins |
| Statins | Simvastatin |  | 45346 | 10414211000001100 | 66066020 | Simvastatin 40mg tablets (Arrow Generics Ltd) | Simvastatin | 40mg | Tablet | Oral | 2120400 | | Statins |
| Statins | Simvastatin |  | 34814 | 4480511000001100 | 65905020 | Simvastatin 20mg tablets (Wockhardt UK Ltd) | Simvastatin | 20mg | Tablet | Oral | 2120400 | | Statins |
| Statins | Simvastatin |  | 818 | 242705001000027000 | 90773020 | Simvastatin 20mg/5ml oral solution sugar free | Simvastatin | 20mg/5ml | Oral Suspension Sugar-Free | Oral | 2120400 | | Statins |
| Statins | Simvastatin |  | 51085 | 19733211000001100 | 38509020 | Simvastatin 10mg tablets (Medreich Plc) | Simvastatin | 10mg | Tablet | Oral | 2120400 | | Statins |
| Statins | Simvastatin |  | 39675 | 183305001000027000 | 72886020 | Simvastatin 20mg/5ml Oral suspension (Martindale Pharmaceuticals Ltd) | Simvastatin | 20mg/5ml | Oral Suspension | Oral | 2120400 | | Statins |
| Statins | Simvastatin |  | 47948 | 13762911000001100 | 66323020 | Simvastatin 10mg tablets (Tillomed Laboratories Ltd) | Simvastatin | 10mg | Tablet | Oral | 2120400 | | Statins |
| Statins | Simvastatin |  | 52676 | 8722011000001100 | 20743020 | Simvastatin 10mg/5ml oral suspension | Simvastatin | 2mg/1ml | Oral suspension | Oral | 2120400 | | Statins |
| Statins | Simvastatin |  | 65181 | 30097711000001100 | 53345021 | Simvastatin 40mg tablets (DE Pharmaceuticals) | Simvastatin | 40mg | Tablet | Oral | 2120400 | | Statins |
| Statins | Simvastatin |  | 39060 | 11551511000001100 | 66656020 | Simvastatin 20mg tablets (Dexcel-Pharma Ltd) | Simvastatin | 20mg | Tablet | Oral | 2120400 | | Statins |
| Statins | Simvastatin |  | 51715 | 15188311000001100 | 2489020 | Simvastatin 10mg tablets (Sigma Pharmaceuticals Plc) | Simvastatin | 10mg | Tablet | Oral | 2120400 | | Statins |
| Statins | Simvastatin |  | 64307 | 28918111000001100 | 47997021 | Simvastatin 40mg tablets (Crescent Pharma Ltd) | Simvastatin | 40mg | Tablet | Oral | 2120400 | | Statins |
| Statins | Simvastatin |  | 40340 | 4380611000001100 | 65874020 | Simvastatin 10mg tablets (Teva UK Ltd) | Simvastatin | 10mg | Tablet | Oral | 2120400 | | Statins |
| Statins | Simvastatin |  | 65901 | 10733711000001100 | 73837020 | Simvastatin 40mg tablets (Zentiva) | Simvastatin | 40mg | Tablet | Oral | 2120400 | | Statins |
| Statins | Simvastatin |  | 48867 | 4574811000001100 | 2512020 | Simvastatin 40mg tablets (Alliance Healthcare (Distribution) Ltd) | Simvastatin | 40mg | Tablet | Oral | 2120400 | | Statins |
| Statins | Simvastatin |  | 56494 | 14732811000001100 | 2504020 | Zocor 20mg tablets (Sigma Pharmaceuticals Plc) | Simvastatin | 20mg | Tablet | Oral | 2120400 | | Statins |
| Statins | Simvastatin |  | 68686 | 33555611000001100 | 70624021 | Simvastatin 20mg tablets (Genesis Pharmaceuticals Ltd) | Simvastatin | 20mg | Tablet | Oral | 2120400 | | Statins |
| Statins | Simvastatin |  | 51 | 320000009 | 72489020 | Simvastatin 40mg tablets | Simvastatin | 40mg | Tablet | Oral | 2120400 | | Statins |
| Statins | Simvastatin |  | 54976 | 10618511000001100 | 2486020 | Simvastatin 10mg tablets (Somex Pharma) | Simvastatin | 10mg | Tablet | Oral | 2120400 | | Statins |
| Statins | Simvastatin |  | 55452 | 17785511000001100 | 2508020 | Simvastatin 20mg tablets (Phoenix Healthcare Distribution Ltd) | Simvastatin | 20mg | Tablet | Oral | 2120400 | | Statins |
| Statins | Simvastatin |  | 2718 | 108111000001106 | 72482020 | Zocor 10mg tablets (Merck Sharp & Dohme Ltd) | Simvastatin | 10mg | Tablet | Oral | 2120400 | | Statins |
| Statins | Simvastatin |  | 68563 | 32495011000001100 | 66012021 | Simvastatin 40mg tablets (Brown & Burk UK Ltd) | Simvastatin | 40mg | Tablet | Oral | 2120400 | | Statins |
| Statins | Simvastatin |  | 49062 | 4574611000001100 | 2496020 | Simvastatin 20mg tablets (Alliance Healthcare (Distribution) Ltd) | Simvastatin | 20mg | Tablet | Oral | 2120400 | | Statins |
| Statins | Simvastatin |  | 48018 | 10414011000001100 | 66063020 | Simvastatin 20mg tablets (Arrow Generics Ltd) | Simvastatin | 20mg | Tablet | Oral | 2120400 | | Statins |
| Statins | Simvastatin |  | 34376 | 4381111000001100 | 65883020 | Simvastatin 40mg tablets (Teva UK Ltd) | Simvastatin | 40mg | Tablet | Oral | 2120400 | | Statins |
| Statins | Simvastatin |  | 52257 | 18468011000001100 | 2510020 | Simvastatin 20mg tablets (Accord Healthcare Ltd) | Simvastatin | 20mg | Tablet | Oral | 2120400 | | Statins |
| Statins | Simvastatin |  | 51166 | 19733611000001100 | 38511020 | Simvastatin 40mg tablets (Medreich Plc) | Simvastatin | 40mg | Tablet | Oral | 2120400 | | Statins |
| Statins | Simvastatin |  | 53415 | 19197411000001100 | 2495020 | Simvastatin 10mg tablets (Milpharm Ltd) | Simvastatin | 10mg | Tablet | Oral | 2120400 | | Statins |
| Statins | Simvastatin |  | 54493 | 10296911000001100 | 2485020 | Simvastatin 10mg tablets (Relonchem Ltd) | Simvastatin | 10mg | Tablet | Oral | 2120400 | | Statins |
| Statins | Simvastatin |  | 34312 | 4464011000001100 | 66042020 | Simvastatin 20mg tablets (Mylan) | Simvastatin | 20mg | Tablet | Oral | 2120400 | | Statins |
| Statins | Simvastatin |  | 5148 | 320006003 | 77174020 | Simvastatin 80mg tablets | Simvastatin | 80mg | Tablet | Oral | 2120400 | | Statins |
| Statins | Simvastatin |  | 34381 | 4466711000001100 | 65927020 | Simvastatin 40mg tablets (IVAX Pharmaceuticals UK Ltd) | Simvastatin | 40mg | Tablet | Oral | 2120400 | | Statins |
| Statins | Simvastatin |  | 72050 | 33654911000001100 | 71081021 | Simvastatin 10mg tablets (Genesis Pharmaceuticals Ltd) | Simvastatin | 10mg | Tablet | Oral | 2120400 | | Statins |
| Statins | Simvastatin |  | 64180 | 28918311000001100 | 47995021 | Simvastatin 10mg tablets (Crescent Pharma Ltd) | Simvastatin | 10mg | Tablet | Oral | 2120400 | | Statins |
| Statins | Simvastatin |  | 56481 | 14732411000001100 | 2488020 | Zocor 10mg tablets (Sigma Pharmaceuticals Plc) | Simvastatin | 10mg | Tablet | Oral | 2120400 | | Statins |
| Statins | Simvastatin |  | 52812 | 15171911000001100 | 2505020 | Simvastatin 20mg tablets (Sigma Pharmaceuticals Plc) | Simvastatin | 20mg | Tablet | Oral | 2120400 | | Statins |
| Statins | Simvastatin |  | 46878 | 9804311000001100 | 71629020 | Simvastatin 40mg tablets (Almus Pharmaceuticals Ltd) | Simvastatin | 40mg | Tablet | Oral | 2120400 | | Statins |
| Statins | Simvastatin |  | 62137 | 21899611000001100 | 47201020 | Simvastatin 40mg tablets (Waymade Healthcare Plc) | Simvastatin | 40mg | Tablet | Oral | 2120400 | | Statins |
| Statins | Simvastatin |  | 34502 | 4579011000001100 | 65851020 | Simvastatin 40mg tablets (A A H Pharmaceuticals Ltd) | Simvastatin | 40mg | Tablet | Oral | 2120400 | | Statins |
| Statins | Simvastatin |  | 56065 | 21898011000001100 | 47853020 | Simvastatin 20mg/5ml oral suspension sugar free (Waymade Healthcare Plc) | Simvastatin | 4mg/1ml | Oral suspension | Oral | 2120400 | | Statins |
| Statins | Simvastatin |  | 71773 | 32495311000001100 | 66013021 | Simvastatin 80mg tablets (Brown & Burk UK Ltd) | Simvastatin | 80mg | Tablet | Oral | 2120400 | | Statins |
| Statins | Simvastatin |  | 53340 | 16451611000001100 | 2519020 | Zocor 40mg tablets (Lexon (UK) Ltd) | Simvastatin | 40mg | Tablet | Oral | 2120400 | | Statins |
| Statins | Simvastatin |  | 54819 | 17305711000001100 | 77492020 | Simvastatin 40mg/5ml oral suspension sugar free (Rosemont Pharmaceuticals Ltd) | Simvastatin | 8mg/1ml | Oral suspension | Oral | 2120400 | | Statins |
| Statins | Simvastatin |  | 45245 | 4437011000001100 | 65935020 | Simvastatin 20mg tablets (Actavis UK Ltd) | Simvastatin | 20mg | Tablet | Oral | 2120400 | | Statins |
| Statins | Simvastatin |  | 67745 | 10733011000001100 | 73830020 | Simvastatin 10mg tablets (Zentiva) | Simvastatin | 10mg | Tablet | Oral | 2120400 | | Statins |
| Statins | Simvastatin |  | 54985 | 13894411000001100 | 35160020 | Simvastatin 40mg/5ml oral suspension | Simvastatin | 8mg/1ml | Oral suspension | Oral | 2120400 | | Statins |
| Statins | Simvastatin |  | 54240 | 15172411000001100 | 2517020 | Simvastatin 40mg tablets (Sigma Pharmaceuticals Plc) | Simvastatin | 40mg | Tablet | Oral | 2120400 | | Statins |
| Statins | Simvastatin |  | 7196 | 776811000001104 | 72483020 | Zocor 20mg tablets (Merck Sharp & Dohme Ltd) | Simvastatin | 20mg | Tablet | Oral | 2120400 | | Statins |
| Statins | Simvastatin |  | 37434 | 4580311000001100 | 66208020 | Simvastatin 40mg tablets (Sandoz Ltd) | Simvastatin | 40mg | Tablet | Oral | 2120400 | | Statins |
| Statins | Simvastatin |  | 54606 | 18757511000001100 | 78017020 | Simvastatin 20mg/5ml oral suspension sugar free (A A H Pharmaceuticals Ltd) | Simvastatin | 4mg/1ml | Oral suspension | Oral | 2120400 | | Statins |
| Statins | Simvastatin |  | 75134 | 4464511000001100 | 66048020 | Simvastatin 80mg tablets (Mylan) | Simvastatin | 80mg | Tablet | Oral | 2120400 | | Statins |
| Statins | Simvastatin |  | 65925 | 17841911000001100 | 37403020 | Simvastatin 20mg/5ml oral suspension sugar free (Alliance Healthcare (Distribution) Ltd) | Simvastatin | 4mg/1ml | Oral suspension | Oral | 2120400 | | Statins |
| Statins | Simvastatin |  | 34535 | 4463811000001100 | 66039020 | Simvastatin 10mg tablets (Mylan) | Simvastatin | 10mg | Tablet | Oral | 2120400 | | Statins |
| Statins | Simvastatin |  | 34560 | 134055001000027000 | 65668020 | Simvastatin 10mg Tablet (Ratiopharm UK Ltd) | Simvastatin | 10mg | Tablet | Oral | 2120400 | | Statins |
| Statins | Simvastatin |  | 53966 | 17793911000001100 | 2521020 | Simvastatin 40mg tablets (Phoenix Healthcare Distribution Ltd) | Simvastatin | 40mg | Tablet | Oral | 2120400 | | Statins |
| Statins | Simvastatin |  | 46956 | 10414411000001100 | 66069020 | Simvastatin 80mg tablets (Arrow Generics Ltd) | Simvastatin | 80mg | Tablet | Oral | 2120400 | | Statins |
| Statins | Simvastatin |  | 67098 | 32494611000001100 | 66010021 | Simvastatin 10mg tablets (Brown & Burk UK Ltd) | Simvastatin | 10mg | Tablet | Oral | 2120400 | | Statins |
| Statins | Simvastatin |  | 50564 | 10297311000001100 | 2501020 | Simvastatin 20mg tablets (Relonchem Ltd) | Simvastatin | 20mg | Tablet | Oral | 2120400 | | Statins |
| Statins | Simvastatin |  | 34545 | 134145001000027000 | 65677020 | Simvastatin 40mg Tablet (Ratiopharm UK Ltd) | Simvastatin | 40mg | Tablet | Oral | 2120400 | | Statins |
| Statins | Simvastatin |  | 53822 | 16066711000001100 | 2490020 | Simvastatin 10mg tablets (Bristol Laboratories Ltd) | Simvastatin | 10mg | Tablet | Oral | 2120400 | | Statins |
| Statins | Simvastatin |  | 34891 | 4467111000001100 | 65962020 | Simvastatin 20mg tablets (Kent Pharmaceuticals Ltd) | Simvastatin | 20mg | Tablet | Oral | 2120400 | | Statins |
| Statins | Simvastatin |  | 57568 | 16451411000001100 | 2491020 | Zocor 10mg tablets (Lexon (UK) Ltd) | Simvastatin | 10mg | Tablet | Oral | 2120400 | | Statins |
| Statins | Simvastatin |  | 34481 | 4466211000001100 | 65920020 | Simvastatin 10mg tablets (IVAX Pharmaceuticals UK Ltd) | Simvastatin | 10mg | Tablet | Oral | 2120400 | | Statins |
| Statins | Simvastatin |  | 48051 | 4466911000001100 | 65957020 | Simvastatin 10mg tablets (Kent Pharmaceuticals Ltd) | Simvastatin | 10mg | Tablet | Oral | 2120400 | | Statins |
| Statins | Simvastatin |  | 50882 | 10618911000001100 | 2515020 | Simvastatin 40mg tablets (Somex Pharma) | Simvastatin | 40mg | Tablet | Oral | 2120400 | | Statins |
| Statins | Simvastatin |  | 64104 | 28988511000001100 | 47996021 | Simvastatin 20mg tablets (Crescent Pharma Ltd) | Simvastatin | 20mg | Tablet | Oral | 2120400 | | Statins |
| Statins | Simvastatin |  | 67773 | 10733511000001100 | 73834020 | Simvastatin 20mg tablets (Zentiva) | Simvastatin | 20mg | Tablet | Oral | 2120400 | | Statins |
| Statins | Simvastatin |  | 61321 | 4579911000001100 | 66197020 | Simvastatin 10mg tablets (Sandoz Ltd) | Simvastatin | 10mg | Tablet | Oral | 2120400 | | Statins |
| Statins | Simvastatin |  | 39870 | 15158611000001100 | 96704020 | Simvador 80mg tablets (Discovery Pharmaceuticals) | Simvastatin | 80mg | Tablet | Oral | 2120400 | | Statins |
| Statins | Simvastatin |  | 39652 | 256505001000027000 | 96566020 | Simvastatin 40mg/5ml oral solution sugar free | Simvastatin | 40mg/5ml | Oral Suspension Sugar-Free | Oral | 2120400 | | Statins |
| Statins | Simvastatin |  | 34476 | 134095001000027000 | 65672020 | Simvastatin 20mg Tablet (Ratiopharm UK Ltd) | Simvastatin | 20mg | Tablet | Oral | 2120400 | | Statins |
| Statins | Simvastatin |  | 58755 | 17928611000001100 | 2492020 | Simvastatin 10mg tablets (Phoenix Healthcare Distribution Ltd) | Simvastatin | 10mg | Tablet | Oral | 2120400 | | Statins |
| Statins | Simvastatin |  | 52962 | 19733811000001100 | 38512020 | Simvastatin 80mg tablets (Medreich Plc) | Simvastatin | 80mg | Tablet | Oral | 2120400 | | Statins |
| Statins | Simvastatin |  | 49061 | 16067211000001100 | 2518020 | Simvastatin 40mg tablets (Bristol Laboratories Ltd) | Simvastatin | 40mg | Tablet | Oral | 2120400 | | Statins |
| Statins | Simvastatin |  | 34955 | 4578011000001100 | 65829020 | Simvastatin 10mg tablets (A A H Pharmaceuticals Ltd) | Simvastatin | 10mg | Tablet | Oral | 2120400 | | Statins |
| Statins | Simvastatin |  | 44528 | 17305411000001100 | 77364020 | Simvastatin 20mg/5ml oral suspension sugar free (Rosemont Pharmaceuticals Ltd) | Simvastatin | 4mg/1ml | Oral suspension | Oral | 2120400 | | Statins |
| Statins | Simvastatin |  | 48431 | 17429811000001100 | 37429020 | Simvastatin 40mg/5ml oral suspension sugar free | Simvastatin | 8mg/1ml | Oral suspension | Oral | 2120400 | | Statins |
| Statins | Simvastatin |  | 33082 | 4578811000001100 | 65848020 | Simvastatin 20mg tablets (A A H Pharmaceuticals Ltd) | Simvastatin | 20mg | Tablet | Oral | 2120400 | | Statins |
| Statins | Simvastatin |  | 52625 | 4480311000001100 | 65902020 | Simvastatin 10mg tablets (Wockhardt UK Ltd) | Simvastatin | 10mg | Tablet | Oral | 2120400 | | Statins |
| Statins | Simvastatin |  | 34746 | 136355001000027000 | 65949020 | Simvastatin 20mg Tablet (Niche Generics Ltd) | Simvastatin | 20mg | Tablet | Oral | 2120400 | | Statins |
| Statins | Simvastatin | Ezetimibe | 14219 | 414179004 | 89250020 | Simvastatin 80mg / Ezetimibe 10mg tablets | Simvastatin/Ezetimibe | 80mg + 10mg | Tablet | Oral | 02120200/02120400 | | Ezetimibe/Statins |
| Statins | Simvastatin | Ezetimibe | 10172 | 414178007 | 89246020 | Simvastatin 40mg / Ezetimibe 10mg tablets | Simvastatin/Ezetimibe | 40mg + 10mg | Tablet | Oral | 02120200/02120400 | | Ezetimibe/Statins |
| Statins | Simvastatin | Ezetimibe | 21020 | 9309911000001100 | 89244020 | Inegy 10mg/20mg tablets (Merck Sharp & Dohme Ltd) | Simvastatin/Ezetimibe | 20mg + 10mg | Tablet | Oral | 02120200/02120400 | | Ezetimibe/Statins |
| Statins | Simvastatin | Ezetimibe | 11815 | 240705001000027000 | 89258020 | Simvastatin 20mg with ezetimibe 10mg tablet | Simvastatin/Ezetimibe | 20mg + 10mg | Tablets | Oral | 02120200/02120400 | | Ezetimibe/Statins |
| Statins | Simvastatin | Ezetimibe | 10206 | 240725001000027000 | 89262020 | Simvastatin 80mg with ezetimibe 10mg tablet | Simvastatin/Ezetimibe | 80mg + 10mg | Tablets | Oral | 02120200/02120400 | | Ezetimibe/Statins |
| Statins | Simvastatin | Ezetimibe | 16186 | 9310611000001100 | 89255020 | Inegy 10mg/80mg tablets (Merck Sharp & Dohme Ltd) | Simvastatin/Ezetimibe | 80mg + 10mg | Tablet | Oral | 02120200/02120400 | | Ezetimibe/Statins |
| Statins | Simvastatin | Ezetimibe | 10183 | 240715001000027000 | 89260020 | Simvastatin 40mg with ezetimibe 10mg tablet | Simvastatin/Ezetimibe | 40mg + 10mg | Tablets | Oral | 02120200/02120400 | | Ezetimibe/Statins |
| Statins | Simvastatin | Ezetimibe | 7552 | 414177002 | 89242020 | Simvastatin 20mg / Ezetimibe 10mg tablets | Simvastatin/Ezetimibe | 20mg + 10mg | Tablet | Oral | 02120200/02120400 | | Ezetimibe/Statins |
| Statins | Simvastatin | Ezetimibe | 17059 | 9310311000001100 | 89248020 | Inegy 10mg/40mg tablets (Merck Sharp & Dohme Ltd) | Simvastatin/Ezetimibe | 40mg + 10mg | Tablet | Oral | 02120200/02120400 | | Ezetimibe/Statins |
| Statins | Simvastatin | Fibrate | 66780 | 32234211000001100 | 65934021 | Fenofibrate 145mg / Simvastatin 20mg tablets | Simvastatin/Fenofibrate | 20mg + 145mg | Tablet | Oral | 02120300/02120400 | | Fibrates/Statins |
| Statins | Simvastatin | Fibrate | 69528 | 32170911000001100 | 65935021 | Cholib 145mg/20mg tablets (Mylan) | Simvastatin/Fenofibrate | 20mg + 145mg | Tablet | Oral | 02120300/02120400 | | Fibrates/Statins |
| Contraindication for Statins |  |  | 63206 | 15849011000001100 | 76680020 | Itraconazole 100mg capsules (Teva UK Ltd) | Itraconazole | 100mg | Capsule | Oral | 5020100 | | Triazole Antifungals |
| Contraindication for Statins |  |  | 680 | 307611000001107 | 69725020 | Sporanox 100mg capsules (Janssen-Cilag Ltd) | Itraconazole | 100mg | Capsule | Oral | 5020100 | | Triazole Antifungals |
| Contraindication for Statins |  |  | 65106 | 28381411000001100 | 43095021 | Itraconazole 50mg/5ml oral solution sugar free (Alliance Healthcare (Distribution) Ltd) | Itraconazole | 10mg/1ml | Oral solution | Oral | 5020100 | | Triazole Antifungals |
| Contraindication for Statins |  |  | 15978 | 711911000001105 | 82851020 | Sporanox 50mg/5ml oral solution (Janssen-Cilag Ltd) | Itraconazole | 10mg/1ml | Oral solution | Oral | 5020100 | | Triazole Antifungals |
| Contraindication for Statins |  |  | 797 | 324712008 | 69721020 | Itraconazole 100mg capsules | Itraconazole | 100mg | Capsule | Oral | 5020100 | | Triazole Antifungals |
| Contraindication for Statins |  |  | 52720 | 18192211000001100 | 6221020 | Sporanox 100mg capsules (Necessity Supplies Ltd) | Itraconazole | 100mg | Capsule | Oral | 5020100 | | Triazole Antifungals |
| Contraindication for Statins |  |  | 46676 | 9842111000001100 | 72229020 | Itraconazole 100mg capsules (Mylan) | Itraconazole | 100mg | Capsule | Oral | 5020100 | | Triazole Antifungals |
| Contraindication for Statins |  |  | 66590 | 26421311000001100 | 29715021 | Itraconazole 50mg/5ml oral solution sugar free (Kent Pharmaceuticals Ltd) | Itraconazole | 10mg/1ml | Oral solution | Oral | 5020100 | | Triazole Antifungals |
| Contraindication for Statins |  |  | 32029 | 36050811000001100 | 69722020 | Itraconazole 250mg/25ml solution for infusion ampoules and diluent | Itraconazole | 10mg/1ml | Solution for infusion | Intravenous | 5020100 | | Triazole Antifungals |
| Contraindication for Statins |  |  | 40397 | 8098711000001100 | 68386020 | Itraconazole 100mg capsules (Sandoz Ltd) | Itraconazole | 100mg | Capsule | Oral | 5020100 | | Triazole Antifungals |
| Contraindication for Statins |  |  | 14907 | 36036611000001100 | 82847020 | Itraconazole 50mg/5ml oral solution sugar free | Itraconazole | 10mg/1ml | Oral solution | Oral | 5020100 | | Triazole Antifungals |
| Contraindication for Statins |  |  | 4330 | 642811000001106 | 81558020 | Sporanox-Pulse 100mg capsules (Janssen-Cilag Ltd) | Itraconazole | 100mg | Capsule | Oral | 5020100 | | Triazole Antifungals |
| Contraindication for Statins |  |  | 49134 | 20027611000001100 | 39866020 | Sporanox 100mg capsules (Lexon (UK) Ltd) | Itraconazole | 100mg | Capsule | Oral | 5020100 | | Triazole Antifungals |
| Contraindication for Statins |  |  | 36182 | 7961211000001100 | 88324020 | VFEND 40mg/ml oral suspension (Pfizer Ltd) | Voriconazole | 40mg/1ml | Oral suspension | Oral | 5020100 | | Triazole Antifungals |
| Contraindication for Statins |  |  | 43532 | 4115511000001100 | 65573020 | Fluconazole 200mg capsules (Actavis UK Ltd) | Fluconazole | 200mg | Capsule | Oral | 5020100 | | Triazole Antifungals |
| Contraindication for Statins |  |  | 49101 | 18251611000001100 | 6201020 | Diflucan 150mg capsules (Necessity Supplies Ltd) | Fluconazole | 150mg | Capsule | Oral | 5020100 | | Triazole Antifungals |
| Contraindication for Statins |  |  | 58381 | 16051311000001100 | 6196020 | Fluconazole 150mg capsules (Bristol Laboratories Ltd) | Fluconazole | 150mg | Capsule | Oral | 5020100 | | Triazole Antifungals |
| Contraindication for Statins |  |  | 58292 | 15054411000001100 | 6195020 | Fluconazole 150mg capsules (Sigma Pharmaceuticals Plc) | Fluconazole | 150mg | Capsule | Oral | 5020100 | | Triazole Antifungals |
| Contraindication for Statins |  |  | 33482 | 409224007 | 88322020 | Voriconazole 200mg/5ml oral suspension | Voriconazole | 40mg/1ml | Oral suspension | Oral | 5020100 | | Triazole Antifungals |
| Contraindication for Statins |  |  | 73643 | 9753611000001100 | 71943020 | Fluconazole 150mg capsules (Somex Pharma) | Fluconazole | 150mg | Capsule | Oral | 5020100 | | Triazole Antifungals |
| Contraindication for Statins |  |  | 49138 | 18056011000001100 | 6200020 | Diflucan 150mg capsules (Lexon (UK) Ltd) | Fluconazole | 150mg | Capsule | Oral | 5020100 | | Triazole Antifungals |
| Contraindication for Statins |  |  | 14261 | 4880011000001100 | 78206020 | Canesten Thrush Oral 150mg capsules (Bayer Plc) | Fluconazole | 150mg | Capsule | Oral | 5020100 | | Triazole Antifungals |
| Contraindication for Statins |  |  | 69870 | 31060911000001100 | 60863021 | Isavuconazole 100mg capsules | Isavuconazonium sulfate | 100mg | Capsule | Oral | 5020100 | | Triazole Antifungals |
| Contraindication for Statins |  |  | 13115 | 7389311000001100 | 87644020 | Canesten Oral & Cream Duo (Bayer Plc) |  |  | Not applicable | Route of administration not applicable | 05020000/05020100/07020250 | | Antifungal Drugs/Triazole Antifungals/Preparations For Vaginal And Vulval Candidiasis |
| Contraindication for Statins |  |  | 48264 | 5360011000001100 | 6189020 | Diflucan 150mg capsules (Waymade Healthcare Plc) | Fluconazole | 150mg | Capsule | Oral | 05020000/05020100 | | Antifungal Drugs/Triazole Antifungals |
| Contraindication for Statins |  |  | 59017 | 4324711000001100 | 66105020 | Fluconazole 150mg capsules (Kent Pharmaceuticals Ltd) | Fluconazole | 150mg | Capsule | Oral | 5020100 | | Triazole Antifungals |
| Contraindication for Statins |  |  | 46923 | 4330411000001100 | 65647020 | Fluconazole 50mg capsules (Sandoz Ltd) | Fluconazole | 50mg | Capsule | Oral | 5020100 | | Triazole Antifungals |
| Contraindication for Statins |  |  | 11810 | 324710000 | 64112020 | Fluconazole 200mg/5ml oral suspension | Fluconazole | 40mg/1ml | Oral suspension | Oral | 5020100 | | Triazole Antifungals |
| Contraindication for Statins |  |  | 36370 | 10053611000001100 | 90391020 | Noxafil 40mg/ml oral suspension (Merck Sharp & Dohme Ltd) | Posaconazole | 40mg/1ml | Oral suspension | Oral | 5020100 | | Triazole Antifungals |
| Contraindication for Statins |  |  | 54495 | 4813211000001100 | 68608020 | Fluconazole 50mg capsules (Wockhardt UK Ltd) | Fluconazole | 50mg | Capsule | Oral | 5020100 | | Triazole Antifungals |
| Contraindication for Statins |  |  | 5904 | 542711000001108 | 64560020 | Diflucan 200mg/5ml oral suspension (Pfizer Ltd) | Fluconazole | 40mg/1ml | Oral suspension | Oral | 5020100 | | Triazole Antifungals |
| Contraindication for Statins |  |  | 63514 | 28013311000001100 | 43057021 | Posaconazole 300mg/16.7ml solution for infusion vials | Posaconazole | 18mg/1ml | Solution for infusion | Intravenous | 5020100 | | Triazole Antifungals |
| Contraindication for Statins |  |  | 61436 | 24580911000001100 | 26708021 | Posaconazole 100mg gastro-resistant tablets | Posaconazole | 100mg | Gastro-resistant tablet | Oral | 5020100 | | Triazole Antifungals |
| Contraindication for Statins |  |  | 34514 | 4218911000001100 | 65637020 | Fluconazole 150mg capsules (Mylan) | Fluconazole | 150mg | Capsule | Oral | 5020100 | | Triazole Antifungals |
| Contraindication for Statins |  |  | 4229 | 324702001 | 68919020 | Fluconazole 200mg capsules | Fluconazole | 200mg | Capsule | Oral | 5020100 | | Triazole Antifungals |
| Contraindication for Statins |  |  | 4071 | 787611000001105 | 68924020 | Diflucan 200mg capsules (Pfizer Ltd) | Fluconazole | 200mg | Capsule | Oral | 5020100 | | Triazole Antifungals |
| Contraindication for Statins |  |  | 47846 | 4144011000001100 | 65720020 | Fluconazole 200mg capsules (Zentiva) | Fluconazole | 200mg | Capsule | Oral | 5020100 | | Triazole Antifungals |
| Contraindication for Statins |  |  | 50091 | 18056211000001100 | 6182020 | Diflucan 50mg capsules (Lexon (UK) Ltd) | Fluconazole | 50mg | Capsule | Oral | 5020100 | | Triazole Antifungals |
| Contraindication for Statins |  |  | 42087 | 4115711000001100 | 65613020 | Fluconazole 200mg capsules (Teva UK Ltd) | Fluconazole | 200mg | Capsule | Oral | 5020100 | | Triazole Antifungals |
| Contraindication for Statins |  |  | 43539 | 4229811000001100 | 65658020 | Fluconazole 50mg capsules (IVAX Pharmaceuticals UK Ltd) | Fluconazole | 50mg | Capsule | Oral | 5020100 | | Triazole Antifungals |
| Contraindication for Statins |  |  | 60011 | 22349211000001100 | 15678021 | Fluconazole 150mg capsules (Aurobindo Pharma Ltd) | Fluconazole | 150mg | Capsule | Oral | 5020100 | | Triazole Antifungals |
| Contraindication for Statins |  |  | 34303 | 4115311000001100 | 65610020 | Fluconazole 150mg capsules (Teva UK Ltd) | Fluconazole | 150mg | Capsule | Oral | 5020100 | | Triazole Antifungals |
| Contraindication for Statins |  |  | 52768 | 18574311000001100 | 6203020 | Diflucan 150mg capsules (DE Pharmaceuticals) | Fluconazole | 150mg | Capsule | Oral | 5020100 | | Triazole Antifungals |
| Contraindication for Statins |  |  | 34307 | 4333111000001100 | 65735020 | Fluconazole 50mg capsules (A A H Pharmaceuticals Ltd) | Fluconazole | 50mg | Capsule | Oral | 5020100 | | Triazole Antifungals |
| Contraindication for Statins |  |  | 39907 | 386119001 | 82344020 | Voriconazole 200mg powder for solution for infusion vials | Voriconazole | 200mg | Powder for solution for infusion | Intravenous | 5020100 | | Triazole Antifungals |
| Contraindication for Statins |  |  | 48481 | 17995311000001100 | 37644020 | Fluconazole 150mg capsule and Clotrimazole 1% cream |  |  | Not applicable | Route of administration not applicable | 05020000/05020100/07020250 | | Antifungal Drugs/Triazole Antifungals/Preparations For Vaginal And Vulval Candidiasis |
| Contraindication for Statins |  |  | 788 | 165411000001105 | 68922020 | Diflucan 50mg capsules (Pfizer Ltd) | Fluconazole | 50mg | Capsule | Oral | 5020100 | | Triazole Antifungals |
| Contraindication for Statins |  |  | 43692 | 4333311000001100 | 65740020 | Fluconazole 150mg capsules (A A H Pharmaceuticals Ltd) | Fluconazole | 150mg | Capsule | Oral | 5020100 | | Triazole Antifungals |
| Contraindication for Statins |  |  | 6505 | 386118009 | 78557020 | Voriconazole 200mg tablets | Voriconazole | 200mg | Tablet | Oral | 5020100 | | Triazole Antifungals |
| Contraindication for Statins |  |  | 42897 | 4114511000001100 | 65607020 | Fluconazole 50mg capsules (Teva UK Ltd) | Fluconazole | 50mg | Capsule | Oral | 5020100 | | Triazole Antifungals |
| Contraindication for Statins |  |  | 5511 | 324709005 | 64111020 | Fluconazole 50mg/5ml oral suspension | Fluconazole | 10mg/1ml | Oral suspension | Oral | 5020100 | | Triazole Antifungals |
| Contraindication for Statins |  |  | 1892 | 324698000 | 68918020 | Fluconazole 150mg capsules | Fluconazole | 150mg | Capsule | Oral | 5020100 | | Triazole Antifungals |
| Contraindication for Statins |  |  | 42082 | 4334111000001100 | 79077020 | VFEND 50mg tablets (Pfizer Ltd) | Voriconazole | 50mg | Tablet | Oral | 5020100 | | Triazole Antifungals |
| Contraindication for Statins |  |  | 34457 | 4218711000001100 | 65634020 | Fluconazole 50mg capsules (Mylan) | Fluconazole | 50mg | Capsule | Oral | 5020100 | | Triazole Antifungals |
| Contraindication for Statins |  |  | 34763 | 4114311000001100 | 65566020 | Fluconazole 50mg capsules (Actavis UK Ltd) | Fluconazole | 50mg | Capsule | Oral | 5020100 | | Triazole Antifungals |
| Contraindication for Statins |  |  | 53277 | 4248211000001100 | 6175020 | Fluconazole 50mg capsules (Alliance Healthcare (Distribution) Ltd) | Fluconazole | 50mg | Capsule | Oral | 5020100 | | Triazole Antifungals |
| Contraindication for Statins |  |  | 26389 | 386117004 | 78554020 | Voriconazole 50mg tablets | Voriconazole | 50mg | Tablet | Oral | 5020100 | | Triazole Antifungals |
| Contraindication for Statins |  |  | 36819 | 4334711000001100 | 80348020 | VFEND 200mg tablets (Pfizer Ltd) | Voriconazole | 200mg | Tablet | Oral | 5020100 | | Triazole Antifungals |
| Contraindication for Statins |  |  | 10116 | 410946005 | 87642020 | Fluconazole 150mg capsule and Clotrimazole 2% cream |  |  | Not applicable | Route of administration not applicable | 05020000/05020100/07020250 | | Antifungal Drugs/Triazole Antifungals/Preparations For Vaginal And Vulval Candidiasis |
| Contraindication for Statins |  |  | 34320 | 4114911000001100 | 65569020 | Fluconazole 150mg capsules (Actavis UK Ltd) | Fluconazole | 150mg | Capsule | Oral | 5020100 | | Triazole Antifungals |
| Contraindication for Statins |  |  | 57398 | 15087711000001100 | 6207020 | Fluconazole 200mg capsules (Sigma Pharmaceuticals Plc) | Fluconazole | 200mg | Capsule | Oral | 5020100 | | Triazole Antifungals |
| Contraindication for Statins |  |  | 75224 | 7458911000001100 | 69372020 | Fluconazole 150mg capsules (Ranbaxy (UK) Ltd) | Fluconazole | 150mg | Capsule | Oral | 5020100 | | Triazole Antifungals |
| Contraindication for Statins |  |  | 35635 | 36067611000001100 | 92967020 | Fluconazole 50mg/25ml solution for infusion vials | Fluconazole | 2mg/1ml | Solution for infusion | Intravenous | 5020100 | | Triazole Antifungals |
| Contraindication for Statins |  |  | 1309 | 696511000001104 | 68923020 | Diflucan 150mg capsules (Pfizer Ltd) | Fluconazole | 150mg | Capsule | Oral | 5020100 | | Triazole Antifungals |
| Contraindication for Statins |  |  | 1830 | 230911000001102 | 80314020 | Diflucan One 150mg capsules (McNeil Products Ltd) | Fluconazole | 150mg | Capsule | Oral | 05020000/05020100 | | Antifungal Drugs/Triazole Antifungals |
| Contraindication for Statins |  |  | 58120 | 22556111000001100 | 16624021 | Voriconazole 200mg powder and solvent for solution for infusion vials | Voriconazole | 200mg | Powder and solvent for solution for infusion | Intravenous | 5020100 | | Triazole Antifungals |
| Contraindication for Statins |  |  | 46251 | 524111000001102 | 92981020 | Diflucan 50mg/25ml solution for infusion vials (Pfizer Ltd) | Fluconazole | 2mg/1ml | Solution for infusion | Intravenous | 5020100 | | Triazole Antifungals |
| Contraindication for Statins |  |  | 64889 | 10289011000001100 | 6193020 | Fluconazole 150mg capsules (Relonchem Ltd) | Fluconazole | 150mg | Capsule | Oral | 5020100 | | Triazole Antifungals |
| Contraindication for Statins |  |  | 66942 | 10287911000001100 | 6179020 | Fluconazole 50mg capsules (Relonchem Ltd) | Fluconazole | 50mg | Capsule | Oral | 5020100 | | Triazole Antifungals |
| Contraindication for Statins |  |  | 66122 | 17989911000001100 | 37645020 | Boots Pharmacy Thrush Duo (The Boots Company Plc) |  |  | Not applicable | Route of administration not applicable | 05020000/05020100/07020250 | | Antifungal Drugs/Triazole Antifungals/Preparations For Vaginal And Vulval Candidiasis |
| Contraindication for Statins |  |  | 35851 | 7458711000001100 | 69369020 | Fluconazole 50mg capsules (Ranbaxy (UK) Ltd) | Fluconazole | 50mg | Capsule | Oral | 5020100 | | Triazole Antifungals |
| Contraindication for Statins |  |  | 66308 | 23107711000001100 | 17765021 | Fluconazole 100mg/50ml solution for infusion bottles | Fluconazole | 2mg/1ml | Solution for infusion | Intravenous | 5020100 | | Triazole Antifungals |
| Contraindication for Statins |  |  | 38474 | 424692003 | 90389020 | Posaconazole 40mg/ml oral suspension | Posaconazole | 40mg/1ml | Oral suspension | Oral | 5020100 | | Triazole Antifungals |
| Contraindication for Statins |  |  | 71532 | 34769711000001100 | 78451021 | Fluconazole 400mg/200ml infusion bags | Fluconazole | 2mg/1ml | Infusion | Intravenous | 5020100 | | Triazole Antifungals |
| Contraindication for Statins |  |  | 342 | 324697005 | 68917020 | Fluconazole 50mg capsules | Fluconazole | 50mg | Capsule | Oral | 5020100 | | Triazole Antifungals |
| Contraindication for Statins |  |  | 5857 | 705211000001101 | 64559020 | Diflucan 50mg/5ml oral suspension (Pfizer Ltd) | Fluconazole | 10mg/1ml | Oral suspension | Oral | 5020100 | | Triazole Antifungals |
| Contraindication for Statins |  |  | 61223 | 17909311000001100 | 6198020 | Fluconazole 150mg capsules (Phoenix Healthcare Distribution Ltd) | Fluconazole | 150mg | Capsule | Oral | 5020100 | | Triazole Antifungals |
| Contraindication for Statins |  |  | 62101 | 10286811000001100 | 6206020 | Fluconazole 200mg capsules (Relonchem Ltd) | Fluconazole | 200mg | Capsule | Oral | 5020100 | | Triazole Antifungals |
| Contraindication for Statins |  |  | 7232 | 324852003 | 83918020 | Indinavir 400mg capsules | Indinavir sulfate | 400mg | Capsule | Oral | 05030100/05030151 | | HIV Infection/Protease Inhibitors |
| Contraindication for Statins |  |  | 31907 | 324850006 | 83917020 | Indinavir 200mg capsules | Indinavir sulfate | 200mg | Capsule | Oral | 05030100/05030151 | | HIV Infection/Protease Inhibitors |
| Contraindication for Statins |  |  | 55053 | 4346711000001100 | 83932020 | Crixivan 400mg capsules (Merck Sharp & Dohme Ltd) | Indinavir sulfate | 400mg | Capsule | Oral | 05030100/05030151 | | HIV Infection/Protease Inhibitors |
| Contraindication for Statins |  |  | 37386 | 235365001000027000 | 86785020 | Viracept 250mg Tablet (Roche Products Ltd) | Nelfinavir mesilate | 250mg | Tablet | Oral | 5030151 | | Protease Inhibitors |
| Contraindication for Statins |  |  | 40757 | 442242000 | 96686020 | Darunavir 400mg tablets | Darunavir ethanolate | 400mg | Tablet | Oral | 5030151 | | Protease Inhibitors |
| Contraindication for Statins |  |  | 69369 | 28394411000001100 | 44213021 | Rezolsta 800mg/150mg tablets (Janssen-Cilag Ltd) | Darunavir ethanolate/Cobicistat | 800mg + 150mg | Tablet | Oral | 5030151 | | Protease Inhibitors |
| Contraindication for Statins |  |  | 44383 | 324842002 | 83134020 | Ritonavir 80mg/1ml oral solution sugar free | Ritonavir | 80mg/1ml | Oral solution | Oral | 5030151 | | Protease Inhibitors |
| Contraindication for Statins |  |  | 45630 | 17175011000001100 | 98463020 | Ritonavir 100mg tablets | Ritonavir | 100mg | Tablet | Oral | 5030151 | | Protease Inhibitors |
| Contraindication for Statins |  |  | 32037 | 8159311000001100 | 87724020 | Reyataz 100mg capsules (Bristol-Myers Squibb Pharmaceuticals Ltd) | Atazanavir sulfate | 100mg | Capsule | Oral | 5030151 | | Protease Inhibitors |
| Contraindication for Statins |  |  | 28507 | 422836001 | 83513020 | Saquinavir mesilate 200mg capsules | Saquinavir mesilate | 200mg | Capsule | Oral | 5030151 | | Protease Inhibitors |
| Contraindication for Statins |  |  | 69022 | 32930811000001100 | 69936021 | Ritonavir 100mg oral powder sachets sugar free | Ritonavir | 100mg | Powder | Oral | 5030151 | | Protease Inhibitors |
| Contraindication for Statins |  |  | 39446 | 7337311000001100 | 87726020 | Reyataz 150mg capsules (Bristol-Myers Squibb Pharmaceuticals Ltd) | Atazanavir sulfate | 150mg | Capsule | Oral | 5030151 | | Protease Inhibitors |
| Contraindication for Statins |  |  | 41013 | 13641611000001100 | 95075020 | Reyataz 300mg capsules (Bristol-Myers Squibb Pharmaceuticals Ltd) | Atazanavir sulfate | 300mg | Capsule | Oral | 5030151 | | Protease Inhibitors |
| Contraindication for Statins |  |  | 46693 | 17173311000001100 | 98465020 | Norvir 100mg tablets (AbbVie Ltd) | Ritonavir | 100mg | Tablet | Oral | 5030151 | | Protease Inhibitors |
| Contraindication for Statins |  |  | 62720 | 21536711000001100 | 46676020 | Prezista 100mg/ml oral suspension (Janssen-Cilag Ltd) | Darunavir ethanolate | 100mg/1ml | Oral suspension | Oral | 5030151 | | Protease Inhibitors |
| Contraindication for Statins |  |  | 32699 | 583311000001106 | 55277020 | Viracept 250mg tablets (Roche Products Ltd) | Nelfinavir mesilate | 250mg | Tablet | Oral | 5030151 | | Protease Inhibitors |
| Contraindication for Statins |  |  | 42241 | 9747111000001100 | 89853020 | Aptivus 250mg capsules (Boehringer Ingelheim Ltd) | Tipranavir | 250mg | Capsule | Oral | 5030151 | | Protease Inhibitors |
| Contraindication for Statins |  |  | 70758 | 21635611000001100 | 46675020 | Darunavir 100mg/ml oral suspension sugar free | Darunavir ethanolate | 100mg/1ml | Oral suspension | Oral | 5030151 | | Protease Inhibitors |
| Contraindication for Statins |  |  | 16518 | 324866008 | 76564020 | Nelfinavir 250mg tablets | Nelfinavir mesilate | 250mg | Tablet | Oral | 5030151 | | Protease Inhibitors |
| Contraindication for Statins |  |  | 47283 | 16246211000001100 | 97341020 | Darunavir 75mg tablets | Darunavir ethanolate | 75mg | Tablet | Oral | 5030151 | | Protease Inhibitors |
| Contraindication for Statins |  |  | 27706 | 4690111000001100 | 80613020 | Kaletra 80mg/20mg/1ml oral solution (AbbVie Ltd) | Ritonavir/Lopinavir | 20mg/1ml + 80mg/1ml | Oral solution | Oral | 5030151 | | Protease Inhibitors |
| Contraindication for Statins |  |  | 62881 | 16222711000001100 | 97343020 | Prezista 75mg tablets (Janssen-Cilag Ltd) | Darunavir ethanolate | 75mg | Tablet | Oral | 5030151 | | Protease Inhibitors |
| Contraindication for Statins |  |  | 35494 | 10625411000001100 | 91131020 | Kaletra 200mg/50mg tablets (AbbVie Ltd) | Ritonavir/Lopinavir | 50mg + 200mg | Tablet | Oral | 5030151 | | Protease Inhibitors |
| Contraindication for Statins |  |  | 32281 | 419600002 | 91129020 | Lopinavir 200mg / Ritonavir 50mg tablets | Ritonavir/Lopinavir | 50mg + 200mg | Tablet | Oral | 5030151 | | Protease Inhibitors |
| Contraindication for Statins |  |  | 38541 | 413595003 | 87722020 | Atazanavir 200mg capsules | Atazanavir sulfate | 200mg | Capsule | Oral | 5030151 | | Protease Inhibitors |
| Contraindication for Statins |  |  | 7354 | 423046007 | 89283020 | Saquinavir mesilate 500mg tablets | Saquinavir mesilate | 500mg | Tablet | Oral | 5030151 | | Protease Inhibitors |
| Contraindication for Statins |  |  | 56125 | 21890111000001100 | 47901020 | Darunavir 800mg tablets | Darunavir ethanolate | 800mg | Tablet | Oral | 5030151 | | Protease Inhibitors |
| Contraindication for Statins |  |  | 57184 | 16246111000001100 | 97345020 | Darunavir 150mg tablets | Darunavir ethanolate | 150mg | Tablet | Oral | 5030151 | | Protease Inhibitors |
| Contraindication for Statins |  |  | 23098 | 413593005 | 87718020 | Atazanavir 100mg capsules | Atazanavir sulfate | 100mg | Capsule | Oral | 5030151 | | Protease Inhibitors |
| Contraindication for Statins |  |  | 41160 | 424264002 | 95073020 | Atazanavir 300mg capsules | Atazanavir sulfate | 300mg | Capsule | Oral | 5030151 | | Protease Inhibitors |
| Contraindication for Statins |  |  | 40455 | 442384006 | 96682020 | Darunavir 600mg tablets | Darunavir ethanolate | 600mg | Tablet | Oral | 5030151 | | Protease Inhibitors |
| Contraindication for Statins |  |  | 47325 | 15164311000001100 | 96688020 | Prezista 400mg tablets (Janssen-Cilag Ltd) | Darunavir ethanolate | 400mg | Tablet | Oral | 5030151 | | Protease Inhibitors |
| Contraindication for Statins |  |  | 43370 | 433142003 | 95085020 | Lopinavir 100mg / Ritonavir 25mg tablets | Ritonavir/Lopinavir | 25mg + 100mg | Tablet | Oral | 5030151 | | Protease Inhibitors |
| Contraindication for Statins |  |  | 39222 | 13631411000001100 | 95087020 | Kaletra 100mg/25mg tablets (AbbVie Ltd) | Ritonavir/Lopinavir | 25mg + 100mg | Tablet | Oral | 5030151 | | Protease Inhibitors |
| Contraindication for Statins |  |  | 61697 | 16423811000001100 | 97804020 | Aptivus 100mg/ml oral solution (Boehringer Ingelheim Ltd) | Tipranavir | 100mg/1ml | Oral solution | Oral | 5030151 | | Protease Inhibitors |
| Contraindication for Statins |  |  | 36717 | 407020003 | 88197020 | Fosamprenavir 700mg tablets | Fosamprenavir calcium | 700mg | Tablet | Oral | 5030151 | | Protease Inhibitors |
| Contraindication for Statins |  |  | 60069 | 21834111000001100 | 47902020 | Prezista 800mg tablets (Janssen-Cilag Ltd) | Darunavir ethanolate | 800mg | Tablet | Oral | 5030151 | | Protease Inhibitors |
| Contraindication for Statins |  |  | 16065 | 413594004 | 87720020 | Atazanavir 150mg capsules | Atazanavir sulfate | 150mg | Capsule | Oral | 5030151 | | Protease Inhibitors |
| Contraindication for Statins |  |  | 31451 | 324867004 | 76565020 | Nelfinavir 50mg/g oral powder | Nelfinavir mesilate | 50mg/1gram | Powder | Oral | 0 | | Unknown |
| Contraindication for Statins |  |  | 32275 | 134577000 | 79378020 | Lopinavir 133.3mg / Ritonavir 33.3mg capsules | Ritonavir/Lopinavir | 33.3mg + 133.3mg | Capsule | Oral | 0 | | Unknown |
| Contraindication for Statins |  |  | 21022 | 4668711000001100 | 80612020 | Kaletra 133.3mg/33.3mg capsules (Abbott Laboratories Ltd) | Ritonavir/Lopinavir | 33.3mg + 133.3mg | Capsule | Oral | 0 | | Unknown |
| Contraindication for Statins |  |  | 34869 | 18645001000027100 | 50361020 | Erythromycin 500mg Tablet (C P Pharmaceuticals Ltd) | Erythromycin | 500mg | Tablet | Oral | 05010500/13060201 | | Macrolides/Oral Antibacterials For Acne |
| Contraindication for Statins |  |  | 2429 | 324232005 | 60842020 | Erythromycin ethyl succinate 125mg/5ml oral suspension | Erythromycin ethyl succinate | 25mg/1ml | Oral suspension | Oral | 5010500 | | Macrolides |
| Contraindication for Statins |  |  | 55589 | 580111000001102 | 5853020 | Erythromycin ethyl succinate 125mg/5ml oral suspension sugar free (Alliance Healthcare (Distribution) Ltd) | Erythromycin ethyl succinate | 25mg/1ml | Oral suspension | Oral | 5010500 | | Macrolides |
| Contraindication for Statins |  |  | 58841 | 840611000001104 | 5854020 | Erythromycin ethyl succinate 125mg/5ml oral suspension sugar free (Kent Pharmaceuticals Ltd) | Erythromycin ethyl succinate | 25mg/1ml | Oral suspension | Oral | 5010500 | | Macrolides |
| Contraindication for Statins |  |  | 34795 | 2411000001108 | 61120020 | Erythromycin ethyl succinate 125mg/5ml oral suspension sugar free (IVAX Pharmaceuticals UK Ltd) | Erythromycin ethyl succinate | 25mg/1ml | Oral suspension | Oral | 5010500 | | Macrolides |
| Contraindication for Statins |  |  | 34779 | 231611000001103 | 59393020 | Erythromycin ethyl succinate 125mg/5ml oral suspension (Sandoz Ltd) | Erythromycin ethyl succinate | 25mg/1ml | Oral suspension | Oral | 5010500 | | Macrolides |
| Contraindication for Statins |  |  | 46696 | 103911000001104 | 59394020 | Erythromycin ethyl succinate 250mg/5ml oral suspension (Sandoz Ltd) | Erythromycin ethyl succinate | 50mg/1ml | Oral suspension | Oral | 5010500 | | Macrolides |
| Contraindication for Statins |  |  | 825 | 10475001000027100 | 49314020 | Erythroped pi 125mg/5ml Oral suspension (Abbott Laboratories Ltd) | Erythromycin ethyl succinate | 25mg/1ml | Oral suspension | Oral | 5010500 | | Macrolides |
| Contraindication for Statins |  |  | 68367 | 32163811000001100 | 62309021 | Erythromycin ethyl succinate 500mg tablets (Dawa Ltd) | Erythromycin ethyl succinate | 500mg | Tablet | Oral | 5010500 | | Macrolides |
| Contraindication for Statins |  |  | 39623 | 294211000001105 | 96642020 | Erythroped PI SF 125mg/5ml oral suspension (Advanz Pharma) | Erythromycin ethyl succinate | 25mg/1ml | Oral suspension | Oral | 5010500 | | Macrolides |
| Contraindication for Statins |  |  | 33686 | 482311000001107 | 64160020 | Erythromycin 250mg gastro-resistant capsules (A A H Pharmaceuticals Ltd) | Erythromycin | 250mg | Gastro-resistant capsule | Oral | 05010500/13060201 | | Macrolides/Oral Antibacterials For Acne |
| Contraindication for Statins |  |  | 62466 | 433911000001109 | 56365020 | Erythromycin ethyl succinate 500mg/5ml oral suspension sugar free (A A H Pharmaceuticals Ltd) | Erythromycin ethyl succinate | 100mg/1ml | Oral suspension | Oral | 5010500 | | Macrolides |
| Contraindication for Statins |  |  | 61612 | 21975811000001100 | 47442020 | Erythromycin ethyl succinate 250mg/5ml oral suspension sugar free (Waymade Healthcare Plc) | Erythromycin ethyl succinate | 50mg/1ml | Oral suspension | Oral | 5010500 | | Macrolides |
| Contraindication for Statins |  |  | 60263 | 626611000001105 | 5860020 | Erythromycin ethyl succinate 500mg/5ml oral suspension sugar free (Alliance Healthcare (Distribution) Ltd) | Erythromycin ethyl succinate | 100mg/1ml | Oral suspension | Oral | 5010500 | | Macrolides |
| Contraindication for Statins |  |  | 3572 | 77535001000027100 | 57928020 | Erythroped 250mg Powder (Abbott Laboratories Ltd) | Erythromycin Ethyl Succinate | 250mg | Powder | Oral | 5010500 | | Macrolides |
| Contraindication for Statins |  |  | 41604 | 18695001000027100 | 50367020 | Erythromycin 500mg Tablet (Hillcross Pharmaceuticals Ltd) | Erythromycin | 500mg | Tablet | Oral | 05010500/13060201 | | Macrolides/Oral Antibacterials For Acne |
| Contraindication for Statins |  |  | 4780 | 332347007 | 73696020 | Erythromycin 40mg/ml / Zinc acetate 12mg/ml lotion | Erythromycin/Zinc acetate | 40mg/1ml + 12mg/1ml | Liquid | Cutaneous | 13060102 | | Topical Antibacterials For Acne |
| Contraindication for Statins |  |  | 49952 | 17902011000001100 | 5865020 | Erythromycin 250mg gastro-resistant capsules (Phoenix Healthcare Distribution Ltd) | Erythromycin | 250mg | Gastro-resistant capsule | Oral | 05010500/13060201 | | Macrolides/Oral Antibacterials For Acne |
| Contraindication for Statins |  |  | 3209 | 10375001000027100 | 49303020 | Erythromid 250mg Tablet (Abbott Laboratories Ltd) | Erythromycin | 250mg | Gastro-resistant tablet | Oral | 05010500/13060201 | | Macrolides/Oral Antibacterials For Acne |
| Contraindication for Statins |  |  | 50580 | 20962611000001100 | 42210020 | Erythromycin 250mg gastro-resistant capsules (Actavis UK Ltd) | Erythromycin | 250mg | Gastro-resistant capsule | Oral | 05010500/13060201 | | Macrolides/Oral Antibacterials For Acne |
| Contraindication for Statins |  |  | 48101 | 10307511000001100 | 70460020 | Erythromycin ethyl succinate 125mg/5ml oral suspension sugar free (Focus Pharmaceuticals Ltd) | Erythromycin ethyl succinate | 25mg/1ml | Oral suspension | Oral | 5010500 | | Macrolides |
| Contraindication for Statins |  |  | 25751 | 224275001000027000 | 83701020 | Erythromycin ethylsuccinate (coated) 250mg/5ml oral suspension sugar free | Erythromycin Ethyl Succinate | 250mg/5ml | Oral Suspension Sugar-Free | Oral | 5010500 | | Macrolides |
| Contraindication for Statins |  |  | 58980 | 18069411000001100 | 9141020 | Zineryt lotion (Lexon (UK) Ltd) | Erythromycin/Zinc acetate | 40mg/1ml + 12mg/1ml | Liquid | Cutaneous | 13060102 | | Topical Antibacterials For Acne |
| Contraindication for Statins |  |  | 72439 | 13621311000001100 | 75489020 | Erythromycin ethyl succinate 500mg/5ml oral suspension sugar free (Pinewood Healthcare) | Erythromycin ethyl succinate | 100mg/1ml | Oral suspension | Oral | 5010500 | | Macrolides |
| Contraindication for Statins |  |  | 4895 | 35910511000001100 | 81193020 | Benzoyl peroxide 5% / Erythromycin 3% gel | Benzoyl peroxide/Erythromycin | 50mg/1gram + 30mg/1gram | Gel | Cutaneous | 0 | | Unknown |
| Contraindication for Statins |  |  | 52428 | 17903711000001100 | 5834020 | Erythromycin 250mg gastro-resistant tablets (Phoenix Healthcare Distribution Ltd) | Erythromycin | 250mg | Gastro-resistant tablet | Oral | 05010500/13060201 | | Macrolides/Oral Antibacterials For Acne |
| Contraindication for Statins |  |  | 62995 | 348611000001104 | 56172020 | Erythromycin ethyl succinate 500mg/5ml oral suspension (A A H Pharmaceuticals Ltd) | Erythromycin ethyl succinate | 100mg/1ml | Oral suspension | Oral | 5010500 | | Macrolides |
| Contraindication for Statins |  |  | 25595 | 364211000001104 | 61119020 | Erythromycin ethyl succinate 500mg/5ml oral suspension sugar free (IVAX Pharmaceuticals UK Ltd) | Erythromycin ethyl succinate | 100mg/1ml | Oral suspension | Oral | 5010500 | | Macrolides |
| Contraindication for Statins |  |  | 45870 | 13620911000001100 | 75482020 | Erythromycin ethyl succinate 125mg/5ml oral suspension sugar free (Pinewood Healthcare) | Erythromycin ethyl succinate | 25mg/1ml | Oral suspension | Oral | 5010500 | | Macrolides |
| Contraindication for Statins |  |  | 4153 | 82315001000027100 | 58448020 | Erythrolar 250mg/5ml Liquid (Lagap) | Erythromycin ethyl succinate | 50mg/1ml | Oral suspension | Oral | 5010500 | | Macrolides |
| Contraindication for Statins |  |  | 73663 | 13620711000001100 | 70457020 | Erythromycin ethyl succinate 500mg/5ml oral suspension (Pinewood Healthcare) | Erythromycin ethyl succinate | 100mg/1ml | Oral suspension | Oral | 5010500 | | Macrolides |
| Contraindication for Statins |  |  | 9760 | 332355000 | 80466020 | Tretinoin 0.025% / Erythromycin 4% solution | Erythromycin/Tretinoin | 40mg/1gram + 250microgram/1gram | Liquid | Cutaneous | 13060103 | | Topical Retinoids And Related Preparations For Acne |
| Contraindication for Statins |  |  | 58760 | 18257511000001100 | 5843020 | Erythroped A 500mg tablets (Necessity Supplies Ltd) | Erythromycin ethyl succinate | 500mg | Tablet | Oral | 5010500 | | Macrolides |
| Contraindication for Statins |  |  | 63 | 324178009 | 59396020 | Erythromycin 250mg gastro-resistant tablets | Erythromycin | 250mg | Gastro-resistant tablet | Oral | 05010500/13060201 | | Macrolides/Oral Antibacterials For Acne |
| Contraindication for Statins |  |  | 66819 | 22878811000001100 | 17441021 | Erythrocin 500 tablets (Waymade Healthcare Plc) | Erythromycin stearate | 500mg | Tablet | Oral | 5010500 | | Macrolides |
| Contraindication for Statins |  |  | 64312 | 13620511000001100 | 70454020 | Erythromycin ethyl succinate 250mg/5ml oral suspension (Pinewood Healthcare) | Erythromycin ethyl succinate | 50mg/1ml | Oral suspension | Oral | 5010500 | | Macrolides |
| Contraindication for Statins |  |  | 59100 | 21976211000001100 | 47440020 | Erythromycin 250mg gastro-resistant tablets (Waymade Healthcare Plc) | Erythromycin | 250mg | Gastro-resistant tablet | Oral | 05010500/13060201 | | Macrolides/Oral Antibacterials For Acne |
| Contraindication for Statins |  |  | 49978 | 10307311000001100 | 5870020 | Erythromycin ethyl succinate 125mg/5ml oral suspension (Focus Pharmaceuticals Ltd) | Erythromycin ethyl succinate | 25mg/1ml | Oral suspension | Oral | 5010500 | | Macrolides |
| Contraindication for Statins |  |  | 65956 | 29852211000001100 | 52265021 | Erythromycin ethyl succinate 125mg/5ml oral suspension (Sigma Pharmaceuticals Plc) | Erythromycin ethyl succinate | 25mg/1ml | Oral suspension | Oral | 5010500 | | Macrolides |
| Contraindication for Statins |  |  | 2672 | 124211000001104 | 73575020 | Zineryt lotion (LEO Pharma) | Erythromycin/Zinc acetate | 40mg/1ml + 12mg/1ml | Liquid | Cutaneous | 13060102 | | Topical Antibacterials For Acne |
| Contraindication for Statins |  |  | 69480 | 30825911000001100 | 57352021 | Erythromycin 250mg gastro-resistant tablets (Mawdsley-Brooks & Company Ltd) | Erythromycin | 250mg | Gastro-resistant tablet | Oral | 05010500/13060201 | | Macrolides/Oral Antibacterials For Acne |
| Contraindication for Statins |  |  | 5397 | 3678811000001100 | 86654020 | Eryacne 2 gel (Galderma (UK) Ltd) | Erythromycin | 20mg/1gram | Gel | Cutaneous | 0 | | Unknown |
| Contraindication for Statins |  |  | 61264 | 23903911000001100 | 21395021 | Erythromycin 250mg gastro-resistant tablets (DE Pharmaceuticals) | Erythromycin | 250mg | Gastro-resistant tablet | Oral | 05010500/13060201 | | Macrolides/Oral Antibacterials For Acne |
| Contraindication for Statins |  |  | 14171 | 324203007 | 81195020 | Erythromycin ethyl succinate 500mg/5ml oral suspension sugar free | Erythromycin ethyl succinate | 100mg/1ml | Oral suspension | Oral | 5010500 | | Macrolides |
| Contraindication for Statins |  |  | 75459 | 16136211000001100 | 9143020 | Aknemycin Plus solution (Lexon (UK) Ltd) | Erythromycin/Tretinoin | 40mg/1gram + 250microgram/1gram | Liquid | Cutaneous | 13060100 | | Topical Preparations For Acne |
| Contraindication for Statins |  |  | 103 | 36064711000001100 | 59398020 | Erythromycin 250mg gastro-resistant capsules | Erythromycin | 250mg | Gastro-resistant capsule | Oral | 0 | | Unknown |
| Contraindication for Statins |  |  | 318 | 65335001000027100 | 56230020 | Erymax 250mg Capsule (Elan Pharma) | Erythromycin | 250mg | Gastro-resistant capsule | Oral | 05010500/13060201 | | Macrolides/Oral Antibacterials For Acne |
| Contraindication for Statins |  |  | 39613 | 30611000001101 | 96634020 | Erythrocin 500 tablets (Advanz Pharma) | Erythromycin stearate | 500mg | Tablet | Oral | 5010500 | | Macrolides |
| Contraindication for Statins |  |  | 34189 | 18635001000027100 | 50360020 | Erythromycin 250mg Tablet (C P Pharmaceuticals Ltd) | Erythromycin | 250mg | Gastro-resistant tablet | Oral | 05010500/13060201 | | Macrolides/Oral Antibacterials For Acne |
| Contraindication for Statins |  |  | 73717 | 18187311000001100 | 9155020 | Isotrexin gel (Mawdsley-Brooks & Company Ltd) | Isotretinoin/Erythromycin | 500microgram/1gram + 20mg/1gram | Gel | Cutaneous | 13060100 | | Topical Preparations For Acne |
| Contraindication for Statins |  |  | 36544 | 216225001000027000 | 81330020 | Arpimycin 125mg/5ml Oral suspension (Rosemont Pharmaceuticals Ltd) | Erythromycin ethyl succinate | 25mg/1ml | Oral suspension | Oral | 5010500 | | Macrolides |
| Contraindication for Statins |  |  | 53004 | 18257211000001100 | 5852020 | Erythrocin 500 tablets (Necessity Supplies Ltd) | Erythromycin stearate | 500mg | Tablet | Oral | 5010500 | | Macrolides |
| Contraindication for Statins |  |  | 23017 | 10315001000027100 | 49295020 | Erycen 500mg Tablet (Berk Pharmaceuticals Ltd) | Erythromycin | 500mg | Tablet | Oral | 05010500/13060201 | | Macrolides/Oral Antibacterials For Acne |
| Contraindication for Statins |  |  | 32898 | 177211000001105 | 56174020 | Erythromycin ethyl succinate 250mg/5ml oral suspension sugar free (A A H Pharmaceuticals Ltd) | Erythromycin ethyl succinate | 50mg/1ml | Oral suspension | Oral | 5010500 | | Macrolides |
| Contraindication for Statins |  |  | 27504 | 222505001000027000 | 83251020 | Primacine 500mg/5ml Liquid (Pinewood Healthcare) | Erythromycin ethyl succinate | 100mg/1ml | Oral suspension | Oral | 5010500 | | Macrolides |
| Contraindication for Statins |  |  | 30980 | 237511000001108 | 63383020 | Erythromycin ethyl succinate 500mg/5ml oral suspension (Kent Pharmaceuticals Ltd) | Erythromycin ethyl succinate | 100mg/1ml | Oral suspension | Oral | 5010500 | | Macrolides |
| Contraindication for Statins |  |  | 23954 | 82275001000027100 | 58444020 | Erythrolar 500mg Tablet (Lagap) | Erythromycin stearate | 500mg | Tablet | Oral | 5010500 | | Macrolides |
| Contraindication for Statins |  |  | 29154 | 70515001000027100 | 56967020 | Erythromycin 250mg Capsule (Actavis UK Ltd) | Erythromycin Lactobionate | 250mg | Capsule | Oral | 05010500/13060201 | | Macrolides/Oral Antibacterials For Acne |
| Contraindication for Statins |  |  | 5067 | 288311000001106 | 79789020 | Isotrexin gel (Stiefel Laboratories (UK) Ltd) | Isotretinoin/Erythromycin | 500microgram/1gram + 20mg/1gram | Gel | Cutaneous | 13060103 | | Topical Retinoids And Related Preparations For Acne |
| Contraindication for Statins |  |  | 31530 | 7211000001107 | 69983020 | Erythromycin 250mg gastro-resistant tablets (Ranbaxy (UK) Ltd) | Erythromycin | 250mg | Gastro-resistant tablet | Oral | 05010500/13060201 | | Macrolides/Oral Antibacterials For Acne |
| Contraindication for Statins |  |  | 39616 | 274611000001103 | 96632020 | Erythrocin 250 tablets (Advanz Pharma) | Erythromycin stearate | 250mg | Tablet | Oral | 5010500 | | Macrolides |
| Contraindication for Statins |  |  | 52952 | 18281911000001100 | 5835020 | Erythromycin 250mg gastro-resistant tablets (Strides Pharma UK Ltd) | Erythromycin | 250mg | Gastro-resistant tablet | Oral | 05010500/13060201 | | Macrolides/Oral Antibacterials For Acne |
| Contraindication for Statins |  |  | 27768 | 82265001000027100 | 58443020 | Erythrolar 250mg Tablet (Lagap) | Erythromycin stearate | 250mg | Tablet | Oral | 5010500 | | Macrolides |
| Contraindication for Statins |  |  | 19330 | 14725001000027100 | 49906020 | Ilosone 250mg/5ml Liquid (Dista Products Ltd) | Erythromycin Lactobionate | 250mg/5ml | Liquid | Oral | 05010500/13060201 | | Macrolides/Oral Antibacterials For Acne |
| Contraindication for Statins |  |  | 32902 | 79111000001102 | 63380020 | Erythromycin ethyl succinate 250mg/5ml oral suspension (Kent Pharmaceuticals Ltd) | Erythromycin ethyl succinate | 50mg/1ml | Oral suspension | Oral | 5010500 | | Macrolides |
| Contraindication for Statins |  |  | 1040 | 276111000001104 | 69143020 | Stiemycin 2% solution (Stiefel Laboratories (UK) Ltd) | Erythromycin | 20mg/1ml | Liquid | Cutaneous | 13060100 | | Topical Preparations For Acne |
| Contraindication for Statins |  |  | 74182 | 17480211000001100 | 9139020 | Zineryt lotion (Mawdsley-Brooks & Company Ltd) | Erythromycin/Zinc acetate | 40mg/1ml + 12mg/1ml | Liquid | Cutaneous | 13060102 | | Topical Antibacterials For Acne |
| Contraindication for Statins |  |  | 33248 | 46235001000027100 | 53834020 | Erythromycin 125mg/5ml Liquid (IVAX Pharmaceuticals UK Ltd) | Erythromycin ethyl succinate | 25mg/1ml | Oral suspension | Oral | 5010500 | | Macrolides |
| Contraindication for Statins |  |  | 33304 | 4227311000001100 | 77508020 | Kerymax 250mg gastro-resistant capsules (Kent Pharmaceuticals Ltd) | Erythromycin | 250mg | Gastro-resistant capsule | Oral | 05010500/13060201 | | Macrolides/Oral Antibacterials For Acne |
| Contraindication for Statins |  |  | 61561 | 21975211000001100 | 47446020 | Erythromycin ethyl succinate 250mg/5ml oral suspension (Waymade Healthcare Plc) | Erythromycin ethyl succinate | 50mg/1ml | Oral suspension | Oral | 5010500 | | Macrolides |
| Contraindication for Statins |  |  | 6426 | 332346003 | 69138020 | Erythromycin 2% solution | Erythromycin | 20mg/1ml | Liquid | Cutaneous | 13060100 | | Topical Preparations For Acne |
| Contraindication for Statins |  |  | 55133 | 10139811000001100 | 5863020 | Erythromycin 250mg gastro-resistant capsules (Kent Pharmaceuticals Ltd) | Erythromycin | 250mg | Gastro-resistant capsule | Oral | 05010500/13060201 | | Macrolides/Oral Antibacterials For Acne |
| Contraindication for Statins |  |  | 13120 | 563411000001101 | 49639020 | Erythromycin ethyl succinate 250mg/5ml oral suspension (A A H Pharmaceuticals Ltd) | Erythromycin ethyl succinate | 50mg/1ml | Oral suspension | Oral | 5010500 | | Macrolides |
| Contraindication for Statins |  |  | 438 | 324180003 | 60855020 | Erythromycin stearate 250mg tablets | Erythromycin stearate | 250mg | Tablet | Oral | 5010500 | | Macrolides |
| Contraindication for Statins |  |  | 553 | 89775001000027100 | 59403020 | Erythromycin 250mg.5ml oral suspension | Erythromycin Ethyl Succinate | 250mg/5ml | Suspension | Oral | 5010500 | | Macrolides |
| Contraindication for Statins |  |  | 54098 | 16172811000001100 | 5840020 | Erythroped A 500mg tablets (Lexon (UK) Ltd) | Erythromycin ethyl succinate | 500mg | Tablet | Oral | 5010500 | | Macrolides |
| Contraindication for Statins |  |  | 75595 | 12605001000027100 | 49623020 | Erythromycin 250mg/5ml Liquid (Berk Pharmaceuticals Ltd) | Erythromycin ethyl succinate | 50mg/1ml | Oral suspension | Oral | 5010500 | | Macrolides |
| Contraindication for Statins |  |  | 64615 | 21975611000001100 | 47441020 | Erythromycin ethyl succinate 125mg/5ml oral suspension sugar free (Waymade Healthcare Plc) | Erythromycin ethyl succinate | 25mg/1ml | Oral suspension | Oral | 5010500 | | Macrolides |
| Contraindication for Statins |  |  | 42661 | 9795911000001100 | 71484020 | Erythromycin 250mg gastro-resistant tablets (Almus Pharmaceuticals Ltd) | Erythromycin | 250mg | Gastro-resistant tablet | Oral | 05010500/13060201 | | Macrolides/Oral Antibacterials For Acne |
| Contraindication for Statins |  |  | 9903 | 98935001000027100 | 60837020 | Erythromycin estolate 250mg capsules | Erythromycin Lactobionate | 250mg | Capsules | Oral | 05010500/13060201 | | Macrolides/Oral Antibacterials For Acne |
| Contraindication for Statins |  |  | 55300 | 52965001000027100 | 54648020 | Erythromycin 500mg Tablet (Teva UK Ltd) | Erythromycin | 500mg | Tablet |  | 05010500/13060201 | | Macrolides/Oral Antibacterials For Acne |
| Contraindication for Statins |  |  | 34334 | 126311000001101 | 62660020 | Erythromycin 250mg gastro-resistant tablets (Mylan) | Erythromycin | 250mg | Gastro-resistant tablet | Oral | 05010500/13060201 | | Macrolides/Oral Antibacterials For Acne |
| Contraindication for Statins |  |  | 1072 | 40235001000027100 | 53068020 | Erythrocin 500 500mg Tablet (Abbott Laboratories Ltd) | Erythromycin stearate | 500mg | Tablet | Oral | 5010500 | | Macrolides |
| Contraindication for Statins |  |  | 27495 | 90685001000027100 | 59508020 | Arpimycin 125mg/5ml Liquid (Rosemont Pharmaceuticals Ltd) | Erythromycin ethyl succinate | 25mg/1ml | Oral suspension | Oral | 5010500 | | Macrolides |
| Contraindication for Statins |  |  | 56203 | 14223111000001100 | 5839020 | Erythroped A 500mg tablets (Sigma Pharmaceuticals Plc) | Erythromycin ethyl succinate | 500mg | Tablet | Oral | 5010500 | | Macrolides |
| Contraindication for Statins |  |  | 201 | 40265001000027100 | 53071020 | Erythrocin 1g/vial Injection (Abbott Laboratories Ltd) | Erythromycin lactobionate | 1gram | Powder for solution for infusion | Intravenous | 5010500 | | Macrolides |
| Contraindication for Statins |  |  | 14511 | 160725001000027000 | 69488020 | Erymax sprinkle 125mg Capsule (Elan Pharma) | Erythromycin | 125mg | Capsule | Oral | 5010500 | | Macrolides |
| Contraindication for Statins |  |  | 42659 | 10060511000001100 | 68765020 | Erythromycin ethyl succinate 125mg/5ml oral suspension sugar free (Abbott Laboratories Ltd) | Erythromycin ethyl succinate | 25mg/1ml | Oral suspension | Oral | 5010500 | | Macrolides |
| Contraindication for Statins |  |  | 4610 | 40345001000027100 | 53079020 | Erythroped forte 500mg/5ml Oral suspension (Abbott Laboratories Ltd) | Erythromycin ethyl succinate | 100mg/1ml | Oral suspension | Oral | 5010500 | | Macrolides |
| Contraindication for Statins |  |  | 24127 | 766711000001101 | 49640020 | Erythromycin 250mg gastro-resistant tablets (A A H Pharmaceuticals Ltd) | Erythromycin | 250mg | Gastro-resistant tablet | Oral | 05010500/13060201 | | Macrolides/Oral Antibacterials For Acne |
| Contraindication for Statins |  |  | 52482 | 17598511000001100 | 9140020 | Zineryt lotion (Sigma Pharmaceuticals Plc) | Erythromycin/Zinc acetate | 40mg/1ml + 12mg/1ml | Liquid | Cutaneous | 13060102 | | Topical Antibacterials For Acne |
| Contraindication for Statins |  |  | 59036 | 13621111000001100 | 75486020 | Erythromycin ethyl succinate 250mg/5ml oral suspension sugar free (Pinewood Healthcare) | Erythromycin ethyl succinate | 50mg/1ml | Oral suspension | Oral | 5010500 | | Macrolides |
| Contraindication for Statins |  |  | 33703 | 89511000001103 | 55311020 | Erythromycin 250mg gastro-resistant tablets (Abbott Laboratories Ltd) | Erythromycin | 250mg | Gastro-resistant tablet | Oral | 05010500/13060201 | | Macrolides/Oral Antibacterials For Acne |
| Contraindication for Statins |  |  | 25280 | 165611000001108 | 80615020 | Tiloryth 250mg gastro-resistant capsules (Tillomed Laboratories Ltd) | Erythromycin | 250mg | Gastro-resistant capsule | Oral | 05010500/13060201 | | Macrolides/Oral Antibacterials For Acne |
| Contraindication for Statins |  |  | 39118 | 222495001000027000 | 83250020 | Primacine 250mg/5ml Liquid (Pinewood Healthcare) | Erythromycin ethyl succinate | 50mg/1ml | Oral suspension | Oral | 5010500 | | Macrolides |
| Contraindication for Statins |  |  | 10190 | 759811000001108 | 87838020 | Erymax 250mg gastro-resistant capsules (Teva UK Ltd) | Erythromycin | 250mg | Gastro-resistant capsule | Oral | 05010500/13060201 | | Macrolides/Oral Antibacterials For Acne |
| Contraindication for Statins |  |  | 52860 | 364011000001109 | 5856020 | Erythromycin ethyl succinate 250mg/5ml oral suspension sugar free (Alliance Healthcare (Distribution) Ltd) | Erythromycin ethyl succinate | 50mg/1ml | Oral suspension | Oral | 5010500 | | Macrolides |
| Contraindication for Statins |  |  | 37022 | 90705001000027100 | 59510020 | Arpimycin 500mg/5ml Liquid (Rosemont Pharmaceuticals Ltd) | Erythromycin ethyl succinate | 100mg/1ml | Oral suspension | Oral | 5010500 | | Macrolides |
| Contraindication for Statins |  |  | 15713 | 153765001000027000 | 68310020 | Erythromycin ethylsuccinate 500mg sachets | Erythromycin Ethyl Succinate | 500mg | Sachets | Oral | 5010500 | | Macrolides |
| Contraindication for Statins |  |  | 50693 | 14222611000001100 | 5847020 | Erythrocin 500 tablets (Sigma Pharmaceuticals Plc) | Erythromycin stearate | 500mg | Tablet | Oral | 5010500 | | Macrolides |
| Contraindication for Statins |  |  | 26189 | 324215006 | 60852020 | Erythromycin 1g powder for solution for infusion vials | Erythromycin lactobionate | 1gram | Powder for solution for infusion | Intravenous | 5010500 | | Macrolides |
| Contraindication for Statins |  |  | 57526 | 5325211000001100 | 9137020 | Zineryt lotion (Dowelhurst Ltd) | Erythromycin/Zinc acetate | 40mg/1ml + 12mg/1ml | Liquid | Cutaneous | 13060102 | | Topical Antibacterials For Acne |
| Contraindication for Statins |  |  | 58487 | 10636911000001100 | 28554020 | Erythromycin 0.5% eye ointment | Erythromycin | 5mg/1gram | Ointment | Ocular | 11030100 | | Antibacterials (In Eye Preparation) |
| Contraindication for Statins |  |  | 41389 | 234075001000027000 | 86347020 | Erythoden 250mg/5ml Liquid (Stevenden Healthcare) | Erythromycin ethyl succinate | 50mg/1ml | Oral suspension | Oral | 5010500 | | Macrolides |
| Contraindication for Statins |  |  | 34512 | 9563611000001100 | 64325020 | Erythromycin 250mg gastro-resistant capsules (Teva UK Ltd) | Erythromycin | 250mg | Gastro-resistant capsule | Oral | 05010500/13060201 | | Macrolides/Oral Antibacterials For Acne |
| Contraindication for Statins |  |  | 34837 | 111015001000027000 | 62571020 | Erythromycin 250mg Gastro-resistant tablet (Co-Pharma Ltd) | Erythromycin | 250mg | Gastro-resistant tablet | Oral | 05010500/13060201 | | Macrolides/Oral Antibacterials For Acne |
| Contraindication for Statins |  |  | 41584 | 46245001000027100 | 53835020 | Erythromycin 250mg/5ml Liquid (IVAX Pharmaceuticals UK Ltd) | Erythromycin ethyl succinate | 50mg/1ml | Oral suspension | Oral | 5010500 | | Macrolides |
| Contraindication for Statins |  |  | 2226 | 324234006 | 60844020 | Erythromycin ethyl succinate 500mg/5ml oral suspension | Erythromycin ethyl succinate | 100mg/1ml | Oral suspension | Oral | 5010500 | | Macrolides |
| Contraindication for Statins |  |  | 25278 | 29665001000027100 | 51705020 | Rommix 500mg Tablet (Ashbourne Pharmaceuticals Ltd) | Erythromycin | 500mg | Tablet | Oral | 05010500/13060201 | | Macrolides/Oral Antibacterials For Acne |
| Contraindication for Statins |  |  | 31428 | 90655001000027100 | 59504020 | Retcin 250mg Tablet (DDSA Pharmaceuticals Ltd) | Erythromycin | 250mg | Gastro-resistant tablet | Oral | 05010500/13060201 | | Macrolides/Oral Antibacterials For Acne |
| Contraindication for Statins |  |  | 8211 | 198895001000027000 | 75817020 | Benzoyl peroxide 5% with Erythromycin 3% gel | Erythromycin/Benzoyl Peroxide | 5% + 3% | Gel | Topical | 13060101/13060102 | | Benzoyl Peroxide And Azelaic Acid For Acne/Topical Antibacterials For Acne |
| Contraindication for Statins |  |  | 39632 | 580811000001109 | 96636020 | Erythroped A 500mg tablets (Advanz Pharma) | Erythromycin ethyl succinate | 500mg | Tablet | Oral | 5010500 | | Macrolides |
| Contraindication for Statins |  |  | 75422 | 32506411000001100 | 66036021 | Erythromycin ethyl succinate 500mg tablets (Alliance Healthcare (Distribution) Ltd) | Erythromycin ethyl succinate | 500mg | Tablet | Oral | 5010500 | | Macrolides |
| Contraindication for Statins |  |  | 55397 | 21935011000001100 | 47444020 | Erythromycin 250mg gastro-resistant capsules (Waymade Healthcare Plc) | Erythromycin | 250mg | Gastro-resistant capsule | Oral | 05010500/13060201 | | Macrolides/Oral Antibacterials For Acne |
| Contraindication for Statins |  |  | 49301 | 17627611000001100 | 5851020 | Erythrolar 500mg tablets (Ennogen Pharma Ltd) | Erythromycin stearate | 500mg | Tablet | Oral | 5010500 | | Macrolides |
| Contraindication for Statins |  |  | 13167 | 682211000001102 | 49638020 | Erythromycin ethyl succinate 125mg/5ml oral suspension (A A H Pharmaceuticals Ltd) | Erythromycin ethyl succinate | 25mg/1ml | Oral suspension | Oral | 5010500 | | Macrolides |
| Contraindication for Statins |  |  | 9148 | 40295001000027100 | 53074020 | Erythromid ds 500mg Tablet (Abbott Laboratories Ltd) | Erythromycin | 500mg | Tablet | Oral | 05010500/13060201 | | Macrolides/Oral Antibacterials For Acne |
| Contraindication for Statins |  |  | 47242 | 12655001000027100 | 49628020 | Erythromycin 250mg/5ml Liquid (C P Pharmaceuticals Ltd) | Erythromycin ethyl succinate | 50mg/1ml | Oral suspension | Oral | 5010500 | | Macrolides |
| Contraindication for Statins |  |  | 60308 | 468911000001109 | 5868020 | Erythromycin ethyl succinate 125mg/5ml oral suspension (Alliance Healthcare (Distribution) Ltd) | Erythromycin ethyl succinate | 25mg/1ml | Oral suspension | Oral | 5010500 | | Macrolides |
| Contraindication for Statins |  |  | 397 | 89765001000027100 | 59402020 | Erythromycin 125mg/5ml oral suspension | Erythromycin Ethyl Succinate | 125mg/5ml | Suspension | Oral | 5010500 | | Macrolides |
| Contraindication for Statins |  |  | 104 | 784911000001105 | 75849020 | Benzamycin gel (Schwarz Pharma Ltd) | Benzoyl peroxide/Erythromycin | 50mg/1gram + 30mg/1gram | Gel | Cutaneous | 0 | | Unknown |
| Contraindication for Statins |  |  | 65667 | 16572211000001100 | 5841020 | Erythroped A 500mg tablets (Mawdsley-Brooks & Company Ltd) | Erythromycin ethyl succinate | 500mg | Tablet | Oral | 5010500 | | Macrolides |
| Contraindication for Statins |  |  | 993 | 40325001000027100 | 53077020 | Erythroped forte 500mg/5ml Liquid (Abbott Laboratories Ltd) | Erythromycin ethyl succinate | 100mg/1ml | Oral suspension | Oral | 5010500 | | Macrolides |
| Contraindication for Statins |  |  | 16747 | 10425001000027100 | 49308020 | Erythroped 250mg Sachets (Abbott Laboratories Ltd) | Erythromycin Ethyl Succinate | 250mg | Sachets | Oral | 5010500 | | Macrolides |
| Contraindication for Statins |  |  | 2225 | 324192003 | 60849020 | Erythromycin ethyl succinate 250mg/5ml oral suspension sugar free | Erythromycin ethyl succinate | 50mg/1ml | Oral suspension | Oral | 5010500 | | Macrolides |
| Contraindication for Statins |  |  | 23244 | 14765001000027100 | 49909020 | Ilotycin 250mg Tablet (Eli Lilly and Company Ltd) | Erythromycin | 250mg | Gastro-resistant tablet | Oral | 05010500/13060201 | | Macrolides/Oral Antibacterials For Acne |
| Contraindication for Statins |  |  | 12330 | 153755001000027000 | 68308020 | Erythromycin ethylsuccinate 1g sachets | Erythromycin Ethyl Succinate | 1g | Sachets | Oral | 5010500 | | Macrolides |
| Contraindication for Statins |  |  | 4489 | 10305001000027100 | 49294020 | Erycen 250mg Tablet (Berk Pharmaceuticals Ltd) | Erythromycin | 250mg | Gastro-resistant tablet | Oral | 05010500/13060201 | | Macrolides/Oral Antibacterials For Acne |
| Contraindication for Statins |  |  | 30520 | 222485001000027000 | 83249020 | Primacine 125mg/5ml Liquid (Pinewood Healthcare) | Erythromycin ethyl succinate | 25mg/1ml | Oral suspension | Oral | 5010500 | | Macrolides |
| Contraindication for Statins |  |  | 401 | 89745001000027100 | 59397020 | Erythromycin 500mg ec gastro-resistant tablets | Erythromycin | 500mg | Gastro-Resistant Tablets | Oral | 05010500/13060201 | | Macrolides/Oral Antibacterials For Acne |
| Contraindication for Statins |  |  | 2376 | 324233000 | 60843020 | Erythromycin ethyl succinate 250mg/5ml oral suspension | Erythromycin ethyl succinate | 50mg/1ml | Oral suspension | Oral | 5010500 | | Macrolides |
| Contraindication for Statins |  |  | 30177 | 273611000001101 | 61118020 | Erythromycin ethyl succinate 250mg/5ml oral suspension sugar free (IVAX Pharmaceuticals UK Ltd) | Erythromycin ethyl succinate | 50mg/1ml | Oral suspension | Oral | 5010500 | | Macrolides |
| Contraindication for Statins |  |  | 2326 | 89785001000027100 | 59404020 | Erythromycin 500mg/5ml oral suspension | Erythromycin Ethyl Succinate | 500mg/5ml | Suspension | Oral | 5010500 | | Macrolides |
| Contraindication for Statins |  |  | 52906 | 789411000001103 | 5831020 | Erythromycin 250mg gastro-resistant tablets (Alliance Healthcare (Distribution) Ltd) | Erythromycin | 250mg | Gastro-resistant tablet | Oral | 05010500/13060201 | | Macrolides/Oral Antibacterials For Acne |
| Contraindication for Statins |  |  | 24220 | 90695001000027100 | 59509020 | Arpimycin 250mg/5ml Liquid (Rosemont Pharmaceuticals Ltd) | Erythromycin ethyl succinate | 50mg/1ml | Oral suspension | Oral | 5010500 | | Macrolides |
| Contraindication for Statins |  |  | 733 | 324179001 | 68309020 | Erythromycin ethyl succinate 500mg tablets | Erythromycin ethyl succinate | 500mg | Tablet | Oral | 5010500 | | Macrolides |
| Contraindication for Statins |  |  | 13635 | 190835001000027000 | 74144020 | Erythromycin ethylsuccinate 250mg sachets | Erythromycin Ethyl Succinate | 250mg | Sachets | Oral | 5010500 | | Macrolides |
| Contraindication for Statins |  |  | 74355 | 29856311000001100 | 52262021 | Erythromycin 250mg gastro-resistant tablets (Sigma Pharmaceuticals Plc) | Erythromycin | 250mg | Gastro-resistant tablet | Oral | 05010500/13060201 | | Macrolides/Oral Antibacterials For Acne |
| Contraindication for Statins |  |  | 33685 | 919211000001106 | 54613020 | Erythromycin 250mg gastro-resistant tablets (Teva UK Ltd) | Erythromycin | 250mg | Gastro-resistant tablet | Oral | 05010500/13060201 | | Macrolides/Oral Antibacterials For Acne |
| Contraindication for Statins |  |  | 33694 | 784711000001108 | 62662020 | Erythromycin ethyl succinate 250mg/5ml oral suspension sugar free (Mylan) | Erythromycin ethyl succinate | 50mg/1ml | Oral suspension | Oral | 5010500 | | Macrolides |
| Contraindication for Statins |  |  | 18643 | 14685001000027100 | 49902020 | Ilosone 500mg Tablet (Dista Products Ltd) | Erythromycin | 500mg | Tablet | Oral | 05010500/13060201 | | Macrolides/Oral Antibacterials For Acne |
| Contraindication for Statins |  |  | 47126 | 13620311000001100 | 70451020 | Erythromycin ethyl succinate 125mg/5ml oral suspension (Pinewood Healthcare) | Erythromycin ethyl succinate | 25mg/1ml | Oral suspension | Oral | 5010500 | | Macrolides |
| Contraindication for Statins |  |  | 50948 | 17902311000001100 | 5871020 | Erythromycin ethyl succinate 125mg/5ml oral suspension (Phoenix Healthcare Distribution Ltd) | Erythromycin ethyl succinate | 25mg/1ml | Oral suspension | Oral | 5010500 | | Macrolides |
| Contraindication for Statins |  |  | 2350 | 324181004 | 60856020 | Erythromycin stearate 500mg tablets | Erythromycin stearate | 500mg | Tablet | Oral | 5010500 | | Macrolides |
| Contraindication for Statins |  |  | 50694 | 258211000001108 | 5862020 | Erythromycin 250mg gastro-resistant capsules (Alliance Healthcare (Distribution) Ltd) | Erythromycin | 250mg | Gastro-resistant capsule | Oral | 05010500/13060201 | | Macrolides/Oral Antibacterials For Acne |
| Contraindication for Statins |  |  | 105 | 10415001000027100 | 49307020 | Erythroped 250mg/5ml Liquid (Abbott Laboratories Ltd) | Erythromycin ethyl succinate | 50mg/1ml | Oral suspension | Oral | 5010500 | | Macrolides |
| Contraindication for Statins |  |  | 71423 | 10308011000001100 | 70464020 | Erythromycin ethyl succinate 250mg/5ml oral suspension sugar free (Focus Pharmaceuticals Ltd) | Erythromycin ethyl succinate | 50mg/1ml | Oral suspension | Oral | 5010500 | | Macrolides |
| Contraindication for Statins |  |  | 34873 | 12615001000027100 | 49624020 | Erythromycin 250mg Tablet (Berk Pharmaceuticals Ltd) | Erythromycin | 250mg | Gastro-resistant tablet | Oral | 05010500/13060201 | | Macrolides/Oral Antibacterials For Acne |
| Contraindication for Statins |  |  | 4372 | 40335001000027100 | 53078020 | Erythroped forte 500mg Sachets (Abbott Laboratories Ltd) | Erythromycin Ethyl Succinate | 500mg | Sachets | Oral | 5010500 | | Macrolides |
| Contraindication for Statins |  |  | 63032 | 23902911000001100 | 21400021 | Erythromycin ethyl succinate 250mg/5ml oral suspension (DE Pharmaceuticals) | Erythromycin ethyl succinate | 50mg/1ml | Oral suspension | Oral | 5010500 | | Macrolides |
| Contraindication for Statins |  |  | 69330 | 46315001000027100 | 53842020 | Erythromycin 250mg/5ml Liquid (Rosemont Pharmaceuticals Ltd) | Erythromycin ethyl succinate | 50mg/1ml | Oral suspension | Oral | 5010500 | | Macrolides |
| Contraindication for Statins |  |  | 31514 | 10060911000001100 | 55309020 | Erythromycin ethyl succinate 500mg/5ml oral suspension sugar free (Abbott Laboratories Ltd) | Erythromycin ethyl succinate | 100mg/1ml | Oral suspension | Oral | 5010500 | | Macrolides |
| Contraindication for Statins |  |  | 46154 | 10060711000001100 | 68768020 | Erythromycin ethyl succinate 250mg/5ml oral suspension sugar free (Abbott Laboratories Ltd) | Erythromycin ethyl succinate | 50mg/1ml | Oral suspension | Oral | 5010500 | | Macrolides |
| Contraindication for Statins |  |  | 73461 | 506011000001101 | 5857020 | Erythromycin ethyl succinate 250mg/5ml oral suspension sugar free (Kent Pharmaceuticals Ltd) | Erythromycin ethyl succinate | 50mg/1ml | Oral suspension | Oral | 5010500 | | Macrolides |
| Contraindication for Statins |  |  | 27203 | 848711000001105 | 54649020 | Erythromycin ethyl succinate 500mg/5ml oral suspension sugar free (Teva UK Ltd) | Erythromycin ethyl succinate | 100mg/1ml | Oral suspension | Oral | 5010500 | | Macrolides |
| Contraindication for Statins |  |  | 37694 | 98945001000027100 | 60838020 | Erythromycin estolate 500mg tablets | Erythromycin Lactobionate | 500mg | Tablets | Oral | 05010500/13060201 | | Macrolides/Oral Antibacterials For Acne |
| Contraindication for Statins |  |  | 34853 | 592611000001105 | 54611020 | Erythromycin ethyl succinate 250mg/5ml oral suspension sugar free (Teva UK Ltd) | Erythromycin ethyl succinate | 50mg/1ml | Oral suspension | Oral | 5010500 | | Macrolides |
| Contraindication for Statins |  |  | 39642 | 178911000001100 | 96640020 | Erythroped Forte SF 500mg/5ml oral suspension (Advanz Pharma) | Erythromycin ethyl succinate | 100mg/1ml | Oral suspension | Oral | 5010500 | | Macrolides |
| Contraindication for Statins |  |  | 18682 | 14695001000027100 | 49903020 | Ilosone 125mg/5ml Liquid (Dista Products Ltd) | Erythromycin Lactobionate | 125mg/5ml | Liquid | Oral | 05010500/13060201 | | Macrolides/Oral Antibacterials For Acne |
| Contraindication for Statins |  |  | 37681 | 4693611000001100 | 92414020 | Erythrocin IV lactobionate 1g powder for solution for infusion vials (Advanz Pharma) | Erythromycin lactobionate | 1gram | Powder for solution for infusion | Intravenous | 5010500 | | Macrolides |
| Contraindication for Statins |  |  | 327 | 153805001000027000 | 68314020 | Erythroped a 500mg Tablet (Abbott Laboratories Ltd) | Erythromycin ethyl succinate | 500mg | Tablet | Oral | 5010500 | | Macrolides |
| Contraindication for Statins |  |  | 5716 | 3678511000001100 | 86660020 | Eryacne 4 gel (Galderma (UK) Ltd) | Erythromycin | 40mg/1gram | Gel | Cutaneous | 13060100 | | Topical Preparations For Acne |
| Contraindication for Statins |  |  | 63458 | 17903011000001100 | 5858020 | Erythromycin ethyl succinate 250mg/5ml oral suspension sugar free (Phoenix Healthcare Distribution Ltd) | Erythromycin ethyl succinate | 50mg/1ml | Oral suspension | Oral | 5010500 | | Macrolides |
| Contraindication for Statins |  |  | 53449 | 18056411000001100 | 5849020 | Erythrocin 500 tablets (Lexon (UK) Ltd) | Erythromycin stearate | 500mg | Tablet | Oral | 5010500 | | Macrolides |
| Contraindication for Statins |  |  | 4891 | 332351009 | 69140020 | Erythromycin 4% gel | Erythromycin | 40mg/1gram | Gel | Cutaneous | 13060100 | | Topical Preparations For Acne |
| Contraindication for Statins |  |  | 24129 | 654811000001103 | 53836020 | Erythromycin 250mg gastro-resistant tablets (IVAX Pharmaceuticals UK Ltd) | Erythromycin | 250mg | Gastro-resistant tablet | Oral | 05010500/13060201 | | Macrolides/Oral Antibacterials For Acne |
| Contraindication for Statins |  |  | 60828 | 24389111000001100 | 23737021 | Erythromycin 250mg gastro-resistant tablets (Bristol Laboratories Ltd) | Erythromycin | 250mg | Gastro-resistant tablet | Oral | 05010500/13060201 | | Macrolides/Oral Antibacterials For Acne |
| Contraindication for Statins |  |  | 58756 | 21935211000001100 | 47445020 | Erythromycin ethyl succinate 125mg/5ml oral suspension (Waymade Healthcare Plc) | Erythromycin ethyl succinate | 25mg/1ml | Oral suspension | Oral | 5010500 | | Macrolides |
| Contraindication for Statins |  |  | 17207 | 14675001000027100 | 49901020 | Ilosone 250mg Capsule (Dista Products Ltd) | Erythromycin Lactobionate | 250mg | Capsule | Oral | 05010500/13060201 | | Macrolides/Oral Antibacterials For Acne |
| Contraindication for Statins |  |  | 40073 | 37545001000027100 | 52720020 | Erythromycin estolate 250mg/5ml suspension | Erythromycin Lactobionate | 250mg/5ml | Suspension | Oral | 05010500/13060201 | | Macrolides/Oral Antibacterials For Acne |
| Contraindication for Statins |  |  | 51984 | 17503311000001100 | 5850020 | Erythrocin 500 tablets (Mawdsley-Brooks & Company Ltd) | Erythromycin stearate | 500mg | Tablet | Oral | 5010500 | | Macrolides |
| Contraindication for Statins |  |  | 37796 | 98955001000027100 | 60839020 | Erythromycin estolate 125mg/5ml suspension | Erythromycin Lactobionate | 125mg/5ml | Suspension | Oral | 05010500/13060201 | | Macrolides/Oral Antibacterials For Acne |
| Contraindication for Statins |  |  | 29344 | 689511000001108 | 56957020 | Erythromycin 250mg gastro-resistant tablets (Actavis UK Ltd) | Erythromycin | 250mg | Gastro-resistant tablet | Oral | 05010500/13060201 | | Macrolides/Oral Antibacterials For Acne |
| Contraindication for Statins |  |  | 74651 | 398811000001108 | 56959020 | Erythromycin ethyl succinate 250mg/5ml oral suspension (Actavis UK Ltd) | Erythromycin ethyl succinate | 50mg/1ml | Oral suspension | Oral | 5010500 | | Macrolides |
| Contraindication for Statins |  |  | 47676 | 12665001000027100 | 49629020 | Erythromycin 500mg/5ml Liquid (C P Pharmaceuticals Ltd) | Erythromycin ethyl succinate | 100mg/1ml | Oral suspension | Oral | 5010500 | | Macrolides |
| Contraindication for Statins |  |  | 59126 | 469911000001101 | 5869020 | Erythromycin ethyl succinate 125mg/5ml oral suspension (Kent Pharmaceuticals Ltd) | Erythromycin ethyl succinate | 25mg/1ml | Oral suspension | Oral | 5010500 | | Macrolides |
| Contraindication for Statins |  |  | 48017 | 234065001000027000 | 86346020 | Erythoden 125mg/5ml Liquid (Stevenden Healthcare) | Erythromycin ethyl succinate | 25mg/1ml | Oral suspension | Oral | 5010500 | | Macrolides |
| Contraindication for Statins |  |  | 21808 | 29655001000027100 | 51703020 | Rommix 125mg/5ml Oral suspension sugar free (Ashbourne Pharmaceuticals Ltd) | Erythromycin ethyl succinate | 25mg/1ml | Oral suspension | Oral | 5010500 | | Macrolides |
| Contraindication for Statins |  |  | 74382 | 29852611000001100 | 52264021 | Erythromycin ethyl succinate 250mg/5ml oral suspension sugar free (Sigma Pharmaceuticals Plc) | Erythromycin ethyl succinate | 50mg/1ml | Oral suspension | Oral | 5010500 | | Macrolides |
| Contraindication for Statins |  |  | 26365 | 46285001000027100 | 53839020 | Erythromycin 500mg Tablet (IVAX Pharmaceuticals UK Ltd) | Erythromycin | 500mg | Tablet | Oral | 05010500/13060201 | | Macrolides/Oral Antibacterials For Acne |
| Contraindication for Statins |  |  | 30234 | 190825001000027000 | 74143020 | Erythromycin ethylsuccinate 125mg sachets | Erythromycin Ethyl Succinate | 125mg | Sachets | Oral | 5010500 | | Macrolides |
| Contraindication for Statins |  |  | 75358 | 30810111000001100 | 57353021 | Erythromycin ethyl succinate 250mg/5ml oral suspension sugar free (Mawdsley-Brooks & Company Ltd) | Erythromycin ethyl succinate | 50mg/1ml | Oral suspension | Oral | 5010500 | | Macrolides |
| Contraindication for Statins |  |  | 71435 | 10308511000001100 | 70469020 | Erythromycin ethyl succinate 500mg/5ml oral suspension sugar free (Focus Pharmaceuticals Ltd) | Erythromycin ethyl succinate | 100mg/1ml | Oral suspension | Oral | 5010500 | | Macrolides |
| Contraindication for Statins |  |  | 4596 | 153795001000027000 | 68313020 | Erythroped a 1g Sachets (Abbott Laboratories Ltd) | Erythromycin Ethyl Succinate | 1g | Sachets | Oral | 5010500 | | Macrolides |
| Contraindication for Statins |  |  | 4672 | 36564711000001100 | 60848020 | Erythromycin ethyl succinate 125mg/5ml oral suspension sugar free | Erythromycin ethyl succinate | 25mg/1ml | Oral suspension | Oral | 5010500 | | Macrolides |
| Contraindication for Statins |  |  | 39669 | 108811000001104 | 96638020 | Erythroped SF 250mg/5ml oral suspension (Advanz Pharma) | Erythromycin ethyl succinate | 50mg/1ml | Oral suspension | Oral | 5010500 | | Macrolides |
| Contraindication for Statins |  |  | 71363 | 5541711000001100 | 5845020 | Erythrocin 500 tablets (Dowelhurst Ltd) | Erythromycin stearate | 500mg | Tablet | Oral | 5010500 | | Macrolides |
| Contraindication for Statins |  |  | 9997 | 332366007 | 55226020 | Isotretinoin 0.05% / Erythromycin 2% gel | Isotretinoin/Erythromycin | 500microgram/1gram + 20mg/1gram | Gel | Cutaneous | 13060103 | | Topical Retinoids And Related Preparations For Acne |
| Contraindication for Statins |  |  | 55483 | 19191611000001100 | 5836020 | Erythromycin 250mg gastro-resistant tablets (Milpharm Ltd) | Erythromycin | 250mg | Gastro-resistant tablet | Oral | 05010500/13060201 | | Macrolides/Oral Antibacterials For Acne |
| Contraindication for Statins |  |  | 60190 | 24099111000001100 | 23095021 | Erythromycin 250mg gastro-resistant tablets (Waymade Healthcare Plc) | Erythromycin | 250mg | Gastro-resistant tablet | Oral | 05010500/13060201 | | Macrolides/Oral Antibacterials For Acne |
| Contraindication for Statins |  |  | 9434 | 224315001000027000 | 83705020 | Erymin 250mg/5ml Oral suspension (Elan Pharma) | Erythromycin Ethyl Succinate | 250mg/5ml | Oral Suspension | Oral | 5010500 | | Macrolides |
| Contraindication for Statins |  |  | 70311 | 816211000001107 | 5872020 | Erythromycin ethyl succinate 250mg/5ml oral suspension (Alliance Healthcare (Distribution) Ltd) | Erythromycin ethyl succinate | 50mg/1ml | Oral suspension | Oral | 5010500 | | Macrolides |
| Contraindication for Statins |  |  | 11611 | 235411000001103 | 51704020 | Rommix 250 EC tablets (Ashbourne Pharmaceuticals Ltd) | Erythromycin | 250mg | Gastro-resistant tablet | Oral | 05010500/13060201 | | Macrolides/Oral Antibacterials For Acne |
| Contraindication for Statins |  |  | 33695 | 549711000001102 | 62661020 | Erythromycin ethyl succinate 125mg/5ml oral suspension sugar free (Mylan) | Erythromycin ethyl succinate | 25mg/1ml | Oral suspension | Oral | 5010500 | | Macrolides |
| Contraindication for Statins |  |  | 532 | 10435001000027100 | 49309020 | Erythroped 250mg/5ml Oral suspension (Abbott Laboratories Ltd) | Erythromycin ethyl succinate | 50mg/1ml | Oral suspension | Oral | 5010500 | | Macrolides |
| Contraindication for Statins |  |  | 58824 | 687011000001109 | 5830020 | Erythromycin 250mg gastro-resistant tablets (Kent Pharmaceuticals Ltd) | Erythromycin | 250mg | Gastro-resistant tablet | Oral | 05010500/13060201 | | Macrolides/Oral Antibacterials For Acne |
| Contraindication for Statins |  |  | 62143 | 23903311000001100 | 21396021 | Erythromycin ethyl succinate 125mg/5ml oral suspension sugar free (DE Pharmaceuticals) | Erythromycin ethyl succinate | 25mg/1ml | Oral suspension | Oral | 5010500 | | Macrolides |
| Contraindication for Statins |  |  | 42296 | 11020911000001100 | 69732020 | Erythromycin 250mg gastro-resistant tablets (Dr Reddy's Laboratories (UK) Ltd) | Erythromycin | 250mg | Gastro-resistant tablet | Oral | 05010500/13060201 | | Macrolides/Oral Antibacterials For Acne |
| Contraindication for Statins |  |  | 71066 | 17899311000001100 | 5842020 | Erythromycin ethyl succinate 500mg tablets (Sigma Pharmaceuticals Plc) | Erythromycin ethyl succinate | 500mg | Tablet | Oral | 5010500 | | Macrolides |
| Contraindication for Statins |  |  | 33697 | 481911000001102 | 56173020 | Erythromycin ethyl succinate 125mg/5ml oral suspension sugar free (A A H Pharmaceuticals Ltd) | Erythromycin ethyl succinate | 25mg/1ml | Oral suspension | Oral | 5010500 | | Macrolides |
| Contraindication for Statins |  |  | 13881 | 3844611000001100 | 80468020 | Aknemycin Plus solution (Almirall Ltd) | Erythromycin/Tretinoin | 40mg/1gram + 250microgram/1gram | Liquid | Cutaneous | 13060100 | | Topical Preparations For Acne |
| Contraindication for Statins |  |  | 64732 | 17902611000001100 | 5855020 | Erythromycin ethyl succinate 125mg/5ml oral suspension sugar free (Phoenix Healthcare Distribution Ltd) | Erythromycin ethyl succinate | 25mg/1ml | Oral suspension | Oral | 5010500 | | Macrolides |
| Contraindication for Statins |  |  | 14429 | 160695001000027000 | 69485020 | Erythromycin 125mg sprinkle capsules | Erythromycin | 125mg | Capsules | Oral | 5010500 | | Macrolides |
| Contraindication for Statins |  |  | 36514 | 216235001000027000 | 81331020 | Arpimycin 250mg/5ml Oral suspension (Rosemont Pharmaceuticals Ltd) | Erythromycin ethyl succinate | 50mg/1ml | Oral suspension | Oral | 5010500 | | Macrolides |
| Contraindication for Statins |  |  | 68226 | 29856111000001100 | 52266021 | Erythromycin ethyl succinate 250mg/5ml oral suspension (Sigma Pharmaceuticals Plc) | Erythromycin ethyl succinate | 50mg/1ml | Oral suspension | Oral | 5010500 | | Macrolides |
| Contraindication for Statins |  |  | 53100 | 13988111000001100 | 9138020 | Zineryt lotion (DE Pharmaceuticals) | Erythromycin/Zinc acetate | 40mg/1ml + 12mg/1ml | Liquid | Cutaneous | 13060102 | | Topical Antibacterials For Acne |
| Contraindication for Statins |  |  | 50205 | 17628011000001100 | 5844020 | Erythrolar 250mg tablets (Ennogen Pharma Ltd) | Erythromycin stearate | 250mg | Tablet | Oral | 5010500 | | Macrolides |
| Contraindication for Statins |  |  | 9656 | 332350005 | 69139020 | Erythromycin 2% gel | Erythromycin | 20mg/1gram | Gel | Cutaneous | 0 | | Unknown |
| Contraindication for Statins |  |  | 997 | 10455001000027100 | 49312020 | Erythroped pi 125mg/5ml Liquid (Abbott Laboratories Ltd) | Erythromycin ethyl succinate | 25mg/1ml | Oral suspension | Oral | 5010500 | | Macrolides |
| Contraindication for Statins |  |  | 34479 | 17198711000001100 | 66554020 | Erythromycin 250mg gastro-resistant tablets (Sovereign Medical Ltd) | Erythromycin | 250mg | Gastro-resistant tablet | Oral | 05010500/13060201 | | Macrolides/Oral Antibacterials For Acne |
| Contraindication for Statins |  |  | 69403 | 32800711000001100 | 69033021 | Erythromycin 250mg gastro-resistant tablets (Genesis Pharmaceuticals Ltd) | Erythromycin | 250mg | Gastro-resistant tablet | Oral | 05010500/13060201 | | Macrolides/Oral Antibacterials For Acne |
| Contraindication for Statins |  |  | 3042 | 10465001000027100 | 49313020 | Erythroped pi 125mg Sachets (Abbott Laboratories Ltd) | Erythromycin Ethyl Succinate | 125mg | Sachets | Oral | 5010500 | | Macrolides |
| Contraindication for Statins |  |  | 480 | 10335001000027100 | 49300020 | Erythrocin 250mg Tablet (Abbott Laboratories Ltd) | Erythromycin stearate | 250mg | Tablet | Oral | 5010500 | | Macrolides |
| Contraindication for Statins |  |  | 59441 | 23902711000001100 | 21399021 | Erythromycin ethyl succinate 125mg/5ml oral suspension (DE Pharmaceuticals) | Erythromycin ethyl succinate | 25mg/1ml | Oral suspension | Oral | 5010500 | | Macrolides |
| Contraindication for Statins |  |  | 34231 | 12595001000027100 | 49622020 | Erythromycin 125mg/5ml Liquid (Berk Pharmaceuticals Ltd) | Erythromycin ethyl succinate | 25mg/1ml | Oral suspension | Oral | 5010500 | | Macrolides |
| Contraindication for Statins |  |  | 50223 | 16544311000001100 | 5848020 | Erythrocin 500 tablets (Stephar (U.K.) Ltd) | Erythromycin stearate | 500mg | Tablet | Oral | 5010500 | | Macrolides |
| Contraindication for Statins |  |  | 33705 | 173511000001103 | 54612020 | Erythromycin ethyl succinate 125mg/5ml oral suspension sugar free (Teva UK Ltd) | Erythromycin ethyl succinate | 25mg/1ml | Oral suspension | Oral | 5010500 | | Macrolides |
| Contraindication for Statins |  |  | 53986 | 19733011000001100 | 38553020 | Erythromycin 250mg gastro-resistant tablets (Medreich Plc) | Erythromycin | 250mg | Gastro-resistant tablet | Oral | 05010500/13060201 | | Macrolides/Oral Antibacterials For Acne |
| Contraindication for Statins |  |  | 52029 | 17481311000001100 | 5930020 | Zithromax 250mg capsules (Mawdsley-Brooks & Company Ltd) | Azithromycin dihydrate | 250mg | Capsule | Oral | 5010500 | | Macrolides |
| Contraindication for Statins |  |  | 54903 | 9157411000001100 | 5894020 | Clarithromycin 125mg/5ml oral suspension (Alliance Healthcare (Distribution) Ltd) | Clarithromycin | 25mg/1ml | Oral suspension | Oral | 5010500 | | Macrolides |
| Contraindication for Statins |  |  | 52502 | 703666002 | 41868020 | Fidaxomicin 200mg tablets | Fidaxomicin | 200mg | Tablet | Oral | 5010500 | | Macrolides |
| Contraindication for Statins |  |  | 57267 | 21854311000001100 | 47449020 | Clarithromycin 125mg/5ml oral suspension (Waymade Healthcare Plc) | Clarithromycin | 25mg/1ml | Oral suspension | Oral | 5010500 | | Macrolides |
| Contraindication for Statins |  |  | 34650 | 8927511000001100 | 69312020 | Clarithromycin 250mg tablets (A A H Pharmaceuticals Ltd) | Clarithromycin | 250mg | Tablet | Oral | 5010500 | | Macrolides |
| Contraindication for Statins |  |  | 52719 | 13765011000001100 | 5884020 | Clarithromycin 250mg tablets (Apotex UK Ltd) | Clarithromycin | 250mg | Tablet | Oral | 5010500 | | Macrolides |
| Contraindication for Statins |  |  | 40784 | 8993811000001100 | 69458020 | Clarithromycin 500mg tablets (Sandoz Ltd) | Clarithromycin | 500mg | Tablet | Oral | 5010500 | | Macrolides |
| Contraindication for Statins |  |  | 58206 | 11028411000001100 | 74059020 | Azithromycin 250mg tablets (Teva UK Ltd) | Azithromycin | 250mg | Tablet | Oral | 5010500 | | Macrolides |
| Contraindication for Statins |  |  | 58902 | 17859811000001100 | 5911020 | Clarithromycin 500mg tablets (Phoenix Healthcare Distribution Ltd) | Clarithromycin | 500mg | Tablet | Oral | 5010500 | | Macrolides |
| Contraindication for Statins |  |  | 60805 | 21854911000001100 | 47450020 | Clarithromycin 500mg tablets (Waymade Healthcare Plc) | Clarithromycin | 500mg | Tablet | Oral | 5010500 | | Macrolides |
| Contraindication for Statins |  |  | 51426 | 20165811000001100 | 39857020 | Clarithromycin 500mg tablets (Accord Healthcare Ltd) | Clarithromycin | 500mg | Tablet | Oral | 5010500 | | Macrolides |
| Contraindication for Statins |  |  | 53875 | 13745811000001100 | 5906020 | Clarithromycin 500mg tablets (Tillomed Laboratories Ltd) | Clarithromycin | 500mg | Tablet | Oral | 5010500 | | Macrolides |
| Contraindication for Statins |  |  | 48163 | 14694011000001100 | 75951020 | Clarithromycin 250mg tablets (Actavis UK Ltd) | Clarithromycin | 250mg | Tablet | Oral | 5010500 | | Macrolides |
| Contraindication for Statins |  |  | 50946 | 15080711000001100 | 5886020 | Clarithromycin 250mg tablets (Sigma Pharmaceuticals Plc) | Clarithromycin | 250mg | Tablet | Oral | 5010500 | | Macrolides |
| Contraindication for Statins |  |  | 57660 | 17965211000001100 | 5889020 | Clarithromycin 250mg tablets (Almus Pharmaceuticals Ltd) | Clarithromycin | 250mg | Tablet | Oral | 5010500 | | Macrolides |
| Contraindication for Statins |  |  | 60382 | 19706711000001100 | 38556020 | Azithromycin 250mg capsules (DE Pharmaceuticals) | Azithromycin dihydrate | 250mg | Capsule | Oral | 5010500 | | Macrolides |
| Contraindication for Statins |  |  | 5357 | 324250003 | 76385020 | Clarithromycin 250mg/5ml oral suspension | Clarithromycin | 50mg/1ml | Oral suspension | Oral | 5010500 | | Macrolides |
| Contraindication for Statins |  |  | 71154 | 5298511000001100 | 5892020 | Klaricid Paediatric 125mg/5ml oral suspension (Dowelhurst Ltd) | Clarithromycin | 25mg/1ml | Oral suspension | Oral | 5010500 | | Macrolides |
| Contraindication for Statins |  |  | 13323 | 324242007 | 75044020 | Clarithromycin 500mg powder for solution for infusion vials | Clarithromycin | 500mg | Powder for solution for infusion | Intravenous | 5010500 | | Macrolides |
| Contraindication for Statins |  |  | 9583 | 232705001000027000 | 86014020 | Klaricid 250mg/5ml Oral suspension (Abbott Laboratories Ltd) | Clarithromycin | 50mg/1ml | Oral suspension | Oral | 5010500 | | Macrolides |
| Contraindication for Statins |  |  | 54897 | 13745611000001100 | 5883020 | Clarithromycin 250mg tablets (Tillomed Laboratories Ltd) | Clarithromycin | 250mg | Tablet | Oral | 5010500 | | Macrolides |
| Contraindication for Statins |  |  | 5116 | 324252006 | 69379020 | Azithromycin 250mg capsules | Azithromycin dihydrate | 250mg | Capsule | Oral | 5010500 | | Macrolides |
| Contraindication for Statins |  |  | 6121 | 40811000001101 | 84082020 | Klaricid XL 500mg tablets (Mylan) | Clarithromycin | 500mg | Modified-release tablet | Oral | 5010500 | | Macrolides |
| Contraindication for Statins |  |  | 681 | 324244008 | 69353020 | Clarithromycin 500mg tablets | Clarithromycin | 500mg | Tablet | Oral | 5010500 | | Macrolides |
| Contraindication for Statins |  |  | 54208 | 15080911000001100 | 5921020 | Clarithromycin 250mg/5ml oral suspension (Sigma Pharmaceuticals Plc) | Clarithromycin | 50mg/1ml | Oral suspension | Oral | 5010500 | | Macrolides |
| Contraindication for Statins |  |  | 54529 | 204945001000027000 | 77628020 | Clarithromycin 500mg Modified-release tablet (Hillcross Pharmaceuticals Ltd) | Clarithromycin | 500mg | Modified-release tablet | Oral | 5010500 | | Macrolides |
| Contraindication for Statins |  |  | 55148 | 9157711000001100 | 5918020 | Clarithromycin 250mg/5ml oral suspension (Alliance Healthcare (Distribution) Ltd) | Clarithromycin | 50mg/1ml | Oral suspension | Oral | 5010500 | | Macrolides |
| Contraindication for Statins |  |  | 62785 | 14968311000001100 | 76079020 | Azithromycin 250mg capsules (A A H Pharmaceuticals Ltd) | Azithromycin dihydrate | 250mg | Capsule | Oral | 5010500 | | Macrolides |
| Contraindication for Statins |  |  | 6497 | 25895001000027100 | 51247020 | Clarithromycin 500mg with metronidazole 400mg with lansoprazole 30mg triple pack | Clarithromycin/Lansoprazole/Metronidazole | 500mg + 400mg + 30mg | Triple Pack |  | 01030500/05010500 | | Proton Pump Inhibitors/Macrolides |
| Contraindication for Statins |  |  | 31420 | 227365001000027000 | 84699020 | Rovamycin 500mg Tablet (Rhone-Poulenc Rorer Ltd) | Spiramycin | 500mg | Tablet | Oral | 5010500 | | Macrolides |
| Contraindication for Statins |  |  | 53086 | 19715011000001100 | 38554020 | Clarithromycin 250mg tablets (DE Pharmaceuticals) | Clarithromycin | 250mg | Tablet | Oral | 5010500 | | Macrolides |
| Contraindication for Statins |  |  | 65259 | 14734611000001100 | 5908020 | Klaricid 500 tablets (Sigma Pharmaceuticals Plc) | Clarithromycin | 500mg | Tablet | Oral | 5010500 | | Macrolides |
| Contraindication for Statins |  |  | 53688 | 9038211000001100 | 70580020 | Clarithromycin 250mg tablets (Ranbaxy (UK) Ltd) | Clarithromycin | 250mg | Tablet | Oral | 5010500 | | Macrolides |
| Contraindication for Statins |  |  | 25900 | 227345001000027000 | 84697020 | Spiramycin 500mg tablet | Spiramycin | 500mg | Tablets | Oral | 5010500 | | Macrolides |
| Contraindication for Statins |  |  | 22964 | 407790000 | 77087020 | Telithromycin 400mg tablets | Telithromycin | 400mg | Tablet | Oral | 5010500 | | Macrolides |
| Contraindication for Statins |  |  | 34974 | 8819111000001100 | 69363020 | Clarithromycin 500mg tablets (Teva UK Ltd) | Clarithromycin | 500mg | Tablet | Oral | 5010500 | | Macrolides |
| Contraindication for Statins |  |  | 71200 | 22389711000001100 | 16215021 | Clarithromycin 2% eye drops preservative free | Clarithromycin | 20mg/1ml | Eye drops | Ocular | 05010500/11030000 | | Macrolides/Anti-Infective Eye Preparations |
| Contraindication for Statins |  |  | 66092 | 13612911000001100 | 5898020 | Clarithromycin 500mg powder for solution for infusion vials (A A H Pharmaceuticals Ltd) | Clarithromycin | 500mg | Powder for solution for infusion | Intravenous | 5010500 | | Macrolides |
| Contraindication for Statins |  |  | 49939 | 9033811000001100 | 5905020 | Clarithromycin 500mg tablets (Alliance Healthcare (Distribution) Ltd) | Clarithromycin | 500mg | Tablet | Oral | 5010500 | | Macrolides |
| Contraindication for Statins |  |  | 54269 | 17522411000001100 | 5887020 | Clarithromycin 250mg tablets (Somex Pharma) | Clarithromycin | 250mg | Tablet | Oral | 5010500 | | Macrolides |
| Contraindication for Statins |  |  | 5057 | 324253001 | 69380020 | Azithromycin 200mg/5ml oral suspension | Azithromycin | 40mg/1ml | Oral suspension | Oral | 5010500 | | Macrolides |
| Contraindication for Statins |  |  | 60814 | 19707211000001100 | 38557020 | Azithromycin 500mg tablets (DE Pharmaceuticals) | Azithromycin | 500mg | Tablet | Oral | 5010500 | | Macrolides |
| Contraindication for Statins |  |  | 765 | 324248006 | 76384020 | Clarithromycin 250mg granules sachets | Clarithromycin | 250mg | Granules | Oral | 5010500 | | Macrolides |
| Contraindication for Statins |  |  | 68723 | 30031911000001100 | 53526021 | Clarithromycin 125mg/5ml oral suspension (DE Pharmaceuticals) | Clarithromycin | 25mg/1ml | Oral suspension | Oral | 5010500 | | Macrolides |
| Contraindication for Statins |  |  | 5335 | 794511000001102 | 69431020 | Zithromax 500mg tablets (Pfizer Ltd) | Azithromycin | 500mg | Tablet | Oral | 5010500 | | Macrolides |
| Contraindication for Statins |  |  | 74293 | 15472611000001100 | 28996020 | Azithromycin 250mg tablets (Alliance Healthcare (Distribution) Ltd) | Azithromycin | 250mg | Tablet | Oral | 5010500 | | Macrolides |
| Contraindication for Statins |  |  | 70218 | 20540311000001100 | 41869020 | Dificlir 200mg tablets (Astellas Pharma Ltd) | Fidaxomicin | 200mg | Tablet | Oral | 5010500 | | Macrolides |
| Contraindication for Statins |  |  | 52158 | 9033411000001100 | 5882020 | Clarithromycin 250mg tablets (Alliance Healthcare (Distribution) Ltd) | Clarithromycin | 250mg | Tablet | Oral | 5010500 | | Macrolides |
| Contraindication for Statins |  |  | 75871 | 35555411000001100 | 80852021 | Clarithromycin 500mg powder for concentrate for solution for infusion vials (Hameln Pharmaceuticals Ltd) | Clarithromycin | 500mg | Powder for solution for infusion | Intravenous | 5010500 | | Macrolides |
| Contraindication for Statins |  |  | 40218 | 11028111000001100 | 74038020 | Azithromycin 500mg tablets (Teva UK Ltd) | Azithromycin | 500mg | Tablet | Oral | 5010500 | | Macrolides |
| Contraindication for Statins |  |  | 58037 | 17965511000001100 | 5912020 | Clarithromycin 500mg tablets (Almus Pharmaceuticals Ltd) | Clarithromycin | 500mg | Tablet | Oral | 5010500 | | Macrolides |
| Contraindication for Statins |  |  | 41453 | 9042011000001100 | 69939020 | Clarithromycin 125mg/5ml oral suspension (Ranbaxy (UK) Ltd) | Clarithromycin | 25mg/1ml | Oral suspension | Oral | 5010500 | | Macrolides |
| Contraindication for Statins |  |  | 53850 | 13652511000001100 | 75372020 | Azithromycin 200mg/5ml oral suspension (A A H Pharmaceuticals Ltd) | Azithromycin | 40mg/1ml | Oral suspension | Oral | 5010500 | | Macrolides |
| Contraindication for Statins |  |  | 6623 | 463111000001102 | 69358020 | Klaricid 500 tablets (Abbott Laboratories Ltd) | Clarithromycin | 500mg | Tablet | Oral | 5010500 | | Macrolides |
| Contraindication for Statins |  |  | 74523 | 19543911000001100 | 5946020 | Azithromycin 500mg tablets (Aspire Pharma Ltd) | Azithromycin | 500mg | Tablet | Oral | 5010500 | | Macrolides |
| Contraindication for Statins |  |  | 34811 | 9042311000001100 | 69944020 | Clarithromycin 250mg/5ml oral suspension (Ranbaxy (UK) Ltd) | Clarithromycin | 50mg/1ml | Oral suspension | Oral | 5010500 | | Macrolides |
| Contraindication for Statins |  |  | 34608 | 8915511000001100 | 69279020 | Clarithromycin 500mg tablets (Mylan) | Clarithromycin | 500mg | Tablet | Oral | 5010500 | | Macrolides |
| Contraindication for Statins |  |  | 53179 | 9547911000001100 | 71684020 | Clarithromycin 250mg/5ml oral suspension (Sandoz Ltd) | Clarithromycin | 50mg/1ml | Oral suspension | Oral | 5010500 | | Macrolides |
| Contraindication for Statins |  |  | 53776 | 19715211000001100 | 38555020 | Clarithromycin 500mg tablets (DE Pharmaceuticals) | Clarithromycin | 500mg | Tablet | Oral | 5010500 | | Macrolides |
| Contraindication for Statins |  |  | 72126 | 30761711000001100 | 57354021 | Clarithromycin 125mg/5ml oral suspension (Almus Pharmaceuticals Ltd) | Clarithromycin | 25mg/1ml | Oral suspension | Oral | 5010500 | | Macrolides |
| Contraindication for Statins |  |  | 65486 | 17283411000001100 | 5935020 | Azithromycin 200mg/5ml oral suspension (Alliance Healthcare (Distribution) Ltd) | Azithromycin | 40mg/1ml | Oral suspension | Oral | 5010500 | | Macrolides |
| Contraindication for Statins |  |  | 51154 | 8825911000001100 | 5881020 | Clarithromycin 250mg tablets (Kent Pharmaceuticals Ltd) | Clarithromycin | 250mg | Tablet | Oral | 5010500 | | Macrolides |
| Contraindication for Statins |  |  | 69613 | 14789411000001100 | 76043020 | Azithromycin 250mg capsules (Teva UK Ltd) | Azithromycin dihydrate | 250mg | Capsule | Oral | 5010500 | | Macrolides |
| Contraindication for Statins |  |  | 54241 | 9253011000001100 | 70699020 | Clarithromycin 250mg/5ml oral suspension (A A H Pharmaceuticals Ltd) | Clarithromycin | 50mg/1ml | Oral suspension | Oral | 5010500 | | Macrolides |
| Contraindication for Statins |  |  | 61810 | 11252311000001100 | 5940020 | Azithromycin 500mg tablets (A A H Pharmaceuticals Ltd) | Azithromycin | 500mg | Tablet | Oral | 5010500 | | Macrolides |
| Contraindication for Statins |  |  | 47582 | 8993611000001100 | 69455020 | Clarithromycin 250mg tablets (Sandoz Ltd) | Clarithromycin | 250mg | Tablet | Oral | 5010500 | | Macrolides |
| Contraindication for Statins |  |  | 54953 | 17648711000001100 | 5899020 | Clarithromycin 500mg powder for concentrate for solution for infusion vials (Martindale Pharmaceuticals Ltd) | Clarithromycin | 500mg | Powder for solution for infusion | Intravenous | 5010500 | | Macrolides |
| Contraindication for Statins |  |  | 53144 | 20096711000001100 | 79034020 | Clarithromycin 250mg tablets (Wockhardt UK Ltd) | Clarithromycin | 250mg | Tablet | Oral | 5010500 | | Macrolides |
| Contraindication for Statins |  |  | 2719 | 220811000001105 | 69356020 | Klaricid 250mg tablets (Abbott Laboratories Ltd) | Clarithromycin | 250mg | Tablet | Oral | 5010500 | | Macrolides |
| Contraindication for Statins |  |  | 58175 | 20097311000001100 | 79037020 | Clarithromycin 500mg tablets (Wockhardt UK Ltd) | Clarithromycin | 500mg | Tablet | Oral | 5010500 | | Macrolides |
| Contraindication for Statins |  |  | 53703 | 8826111000001100 | 5904020 | Clarithromycin 500mg tablets (Kent Pharmaceuticals Ltd) | Clarithromycin | 500mg | Tablet | Oral | 5010500 | | Macrolides |
| Contraindication for Statins |  |  | 46488 | 9038811000001100 | 69947020 | Clarithromycin 500mg tablets (Ranbaxy (UK) Ltd) | Clarithromycin | 500mg | Tablet | Oral | 5010500 | | Macrolides |
| Contraindication for Statins |  |  | 14514 | 650911000001103 | 69430020 | Zithromax 200mg/5ml oral suspension (Pfizer Ltd) | Azithromycin | 40mg/1ml | Oral suspension | Oral | 5010500 | | Macrolides |
| Contraindication for Statins |  |  | 68943 | 29789111000001100 | 52268021 | Clarithromycin 500mg tablets (Sigma Pharmaceuticals Plc) | Clarithromycin | 500mg | Tablet | Oral | 5010500 | | Macrolides |
| Contraindication for Statins |  |  | 34394 | 8914911000001100 | 69276020 | Clarithromycin 250mg tablets (Mylan) | Clarithromycin | 250mg | Tablet | Oral | 5010500 | | Macrolides |
| Contraindication for Statins |  |  | 34533 | 8818911000001100 | 69360020 | Clarithromycin 250mg tablets (Teva UK Ltd) | Clarithromycin | 250mg | Tablet | Oral | 5010500 | | Macrolides |
| Contraindication for Statins |  |  | 63033 | 21854711000001100 | 47448020 | Clarithromycin 250mg tablets (Waymade Healthcare Plc) | Clarithromycin | 250mg | Tablet | Oral | 5010500 | | Macrolides |
| Contraindication for Statins |  |  | 67560 | 30761911000001100 | 57355021 | Clarithromycin 250mg/5ml oral suspension (Almus Pharmaceuticals Ltd) | Clarithromycin | 50mg/1ml | Oral suspension | Oral | 5010500 | | Macrolides |
| Contraindication for Statins |  |  | 14816 | 3253811000001100 | 86013020 | Klaricid Adult 250mg granules sachets (Mylan) | Clarithromycin | 250mg | Granules | Oral | 5010500 | | Macrolides |
| Contraindication for Statins |  |  | 51831 | 18101811000001100 | 5897020 | Clarithromycin 125mg/5ml oral suspension (Phoenix Healthcare Distribution Ltd) | Clarithromycin | 25mg/1ml | Oral suspension | Oral | 5010500 | | Macrolides |
| Contraindication for Statins |  |  | 45795 | 9252611000001100 | 70696020 | Clarithromycin 125mg/5ml oral suspension (A A H Pharmaceuticals Ltd) | Clarithromycin | 25mg/1ml | Oral suspension | Oral | 5010500 | | Macrolides |
| Contraindication for Statins |  |  | 3736 | 159795001000027000 | 69357020 | Klaricid 125mg/5ml Oral suspension (Abbott Laboratories Ltd) | Clarithromycin | 25mg/1ml | Oral suspension | Oral | 5010500 | | Macrolides |
| Contraindication for Statins |  |  | 66034 | 20282311000001100 | 41194020 | Azithromycin 250mg tablets (Sandoz Ltd) | Azithromycin | 250mg | Tablet | Oral | 5010500 | | Macrolides |
| Contraindication for Statins |  |  | 53109 | 17522611000001100 | 5910020 | Clarithromycin 500mg tablets (Somex Pharma) | Clarithromycin | 500mg | Tablet | Oral | 5010500 | | Macrolides |
| Contraindication for Statins |  |  | 4165 | 85911000001108 | 69429020 | Zithromax 250mg capsules (Pfizer Ltd) | Azithromycin dihydrate | 250mg | Capsule | Oral | 5010500 | | Macrolides |
| Contraindication for Statins |  |  | 75316 | 10499211000001100 | 5915020 | Klaricid XL 500mg tablets (Dowelhurst Ltd) | Clarithromycin | 500mg | Modified-release tablet | Oral | 5010500 | | Macrolides |
| Contraindication for Statins |  |  | 331 | 35368711000001100 | 69352020 | Clarithromycin 125mg/5ml oral suspension | Clarithromycin | 25mg/1ml | Oral suspension | Oral | 5010500 | | Macrolides |
| Contraindication for Statins |  |  | 537 | 324238009 | 69351020 | Clarithromycin 250mg tablets | Clarithromycin | 250mg | Tablet | Oral | 5010500 | | Macrolides |
| Contraindication for Statins |  |  | 66957 | 27988011000001100 | 43029021 | Roxithromycin 150mg tablets | Roxithromycin | 150mg | Tablet | Oral | 5010500 | | Macrolides |
| Contraindication for Statins |  |  | 53153 | 17859611000001100 | 5888020 | Clarithromycin 250mg tablets (Phoenix Healthcare Distribution Ltd) | Clarithromycin | 250mg | Tablet | Oral | 5010500 | | Macrolides |
| Contraindication for Statins |  |  | 69438 | 15419311000001100 | 5933020 | Zithromax 200mg/5ml oral suspension (Waymade Healthcare Plc) | Azithromycin | 40mg/1ml | Oral suspension | Oral | 5010500 | | Macrolides |
| Contraindication for Statins |  |  | 39010 | 211000001101 | 95829020 | Klaricid Paediatric 250mg/5ml oral suspension (Mylan) | Clarithromycin | 50mg/1ml | Oral suspension | Oral | 5010500 | | Macrolides |
| Contraindication for Statins |  |  | 49530 | 20281711000001100 | 40561020 | Azithromycin 200mg/5ml oral suspension (Sandoz Ltd) | Azithromycin | 40mg/1ml | Oral suspension | Oral | 5010500 | | Macrolides |
| Contraindication for Statins |  |  | 74616 | 35140911000001100 | 79497021 | Clarithromycin 250mg tablets (Milpharm Ltd) | Clarithromycin | 250mg | Tablet | Oral | 5010500 | | Macrolides |
| Contraindication for Statins |  |  | 38163 | 8928611000001100 | 69317020 | Clarithromycin 500mg tablets (A A H Pharmaceuticals Ltd) | Clarithromycin | 500mg | Tablet | Oral | 5010500 | | Macrolides |
| Contraindication for Statins |  |  | 45591 | 18149211000001100 | 99227020 | Clarie XL 500mg tablets (Teva UK Ltd) | Clarithromycin | 500mg | Modified-release tablet | Oral | 5010500 | | Macrolides |
| Contraindication for Statins |  |  | 53398 | 17997711000001100 | 5900020 | Clarithromycin 500mg powder for concentrate for solution for infusion vials (Mercury Pharma Group Ltd) | Clarithromycin | 500mg | Powder for solution for infusion | Intravenous | 5010500 | | Macrolides |
| Contraindication for Statins |  |  | 52411 | 18271111000001100 | 5890020 | Klaricid 250mg tablets (Necessity Supplies Ltd) | Clarithromycin | 250mg | Tablet | Oral | 5010500 | | Macrolides |
| Contraindication for Statins |  |  | 743 | 324258005 | 69381020 | Azithromycin 500mg tablets | Azithromycin | 500mg | Tablet | Oral | 5010500 | | Macrolides |
| Contraindication for Statins |  |  | 63236 | 18271311000001100 | 5913020 | Klaricid 500 tablets (Necessity Supplies Ltd) | Clarithromycin | 500mg | Tablet | Oral | 5010500 | | Macrolides |
| Contraindication for Statins |  |  | 38997 | 917411000001101 | 95825020 | Klaricid Paediatric 125mg/5ml oral suspension (Mylan) | Clarithromycin | 25mg/1ml | Oral suspension | Oral | 5010500 | | Macrolides |
| Contraindication for Statins |  |  | 72318 | 35141111000001100 | 79498021 | Clarithromycin 500mg tablets (Milpharm Ltd) | Clarithromycin | 500mg | Tablet | Oral | 5010500 | | Macrolides |
| Contraindication for Statins |  |  | 62897 | 18103211000001100 | 5922020 | Clarithromycin 250mg/5ml oral suspension (Phoenix Healthcare Distribution Ltd) | Clarithromycin | 50mg/1ml | Oral suspension | Oral | 5010500 | | Macrolides |
| Contraindication for Statins |  |  | 61830 | 15080411000001100 | 5896020 | Clarithromycin 125mg/5ml oral suspension (Sigma Pharmaceuticals Plc) | Clarithromycin | 25mg/1ml | Oral suspension | Oral | 5010500 | | Macrolides |
| Contraindication for Statins |  |  | 70783 | 32395911000001100 | 62311021 | Azithromycin 500mg tablets (Kent Pharmaceuticals Ltd) | Azithromycin | 500mg | Tablet | Oral | 5010500 | | Macrolides |
| Contraindication for Statins |  |  | 55428 | 21854511000001100 | 47451020 | Clarithromycin 250mg/5ml oral suspension (Waymade Healthcare Plc) | Clarithromycin | 50mg/1ml | Oral suspension | Oral | 5010500 | | Macrolides |
| Contraindication for Statins |  |  | 28289 | 27011000001106 | 75041020 | Klaricid IV 500mg powder for solution for infusion vials (Mylan) | Clarithromycin | 500mg | Powder for solution for infusion | Intravenous | 5010500 | | Macrolides |
| Contraindication for Statins |  |  | 72108 | 34751611000001100 | 78235021 | Clarithromycin 500mg powder for solution for infusion vials (Bowmed Ibisqus Ltd) | Clarithromycin | 500mg | Powder for solution for infusion | Intravenous | 5010500 | | Macrolides |
| Contraindication for Statins |  |  | 43400 | 14759911000001100 | 95687020 | Clamelle 500mg tablets (Actavis UK Ltd) | Azithromycin | 500mg | Tablet | Oral | 5010500 | | Macrolides |
| Contraindication for Statins |  |  | 61001 | 9155811000001100 | 5893020 | Clarithromycin 125mg/5ml oral suspension (Kent Pharmaceuticals Ltd) | Clarithromycin | 25mg/1ml | Oral suspension | Oral | 5010500 | | Macrolides |
| Contraindication for Statins |  |  | 48023 | 14694411000001100 | 75954020 | Clarithromycin 500mg tablets (Actavis UK Ltd) | Clarithromycin | 500mg | Tablet | Oral | 5010500 | | Macrolides |
| Contraindication for Statins |  |  | 65855 | 29668711000001100 | 52011021 | Azithromycin 200mg/5ml oral suspension sugar free | Azithromycin | 40mg/1ml | Oral suspension | Oral | 5010500 | | Macrolides |
| Contraindication for Statins |  |  | 58426 | 11579411000001100 | 74653020 | Azithromycin 500mg tablets (Sandoz Ltd) | Azithromycin | 500mg | Tablet | Oral | 5010500 | | Macrolides |
| Contraindication for Statins |  |  | 54472 | 20165611000001100 | 39856020 | Clarithromycin 250mg tablets (Accord Healthcare Ltd) | Clarithromycin | 250mg | Tablet | Oral | 5010500 | | Macrolides |
| Contraindication for Statins |  |  | 46695 | 203075001000027000 | 77089020 | Azithromycin 500mg Tablet (Hillcross Pharmaceuticals Ltd) | Azithromycin | 500mg | Tablet | Oral | 5010500 | | Macrolides |
| Contraindication for Statins |  |  | 31379 | 98311000001102 | 77090020 | Ketek 400mg tablets (Sanofi) | Telithromycin | 400mg | Tablet | Oral | 5010500 | | Macrolides |
| Contraindication for Statins |  |  | 53168 | 9547411000001100 | 71681020 | Clarithromycin 125mg/5ml oral suspension (Sandoz Ltd) | Clarithromycin | 25mg/1ml | Oral suspension | Oral | 5010500 | | Macrolides |
| Contraindication for Statins |  |  | 6803 | 36142611000001100 | 76383020 | Clarithromycin 500mg modified-release tablets | Clarithromycin | 500mg | Modified-release tablet | Oral | 5010500 | | Macrolides |
| Contraindication for Statins |  |  | 33888 | 11034311000001100 | 91991020 | Azithromycin 250mg tablets | Azithromycin | 250mg | Tablet | Oral | 5010500 | | Macrolides |
| Contraindication for Statins |  |  | 71680 | 30041111000001100 | 53527021 | Clarithromycin 250mg/5ml oral suspension (DE Pharmaceuticals) | Clarithromycin | 50mg/1ml | Oral suspension | Oral | 5010500 | | Macrolides |
| Contraindication for Statins |  |  | 31690 | 9740211000001100 | 89871020 | Clarosip 250mg granules for oral suspension straws (Grunenthal Ltd) | Clarithromycin | 250mg | Granules | Oral | 0 | | Unknown |
| Contraindication for Statins |  |  | 10326 | 9742311000001100 | 89861020 | Clarithromycin 125mg granules straws | Clarithromycin | 125mg | Granules | Oral | 0 | | Unknown |
| Contraindication for Statins |  |  | 54882 | 17965211000001100 | 78517020 | Clarithromycin 250mg tablets (Almus Pharmaceuticals Ltd) | Clarithromycin | 250mg | Tablet | Oral | 0 | | Unknown |
| Contraindication for Statins |  |  | 15290 | 235505001000027000 | 86834020 | Lansoprazole with amoxicillin and clarithromycin 30mg + 500mg + 500mg Triple pack | Amoxicillin Trihydrate/Clarithromycin/Lansoprazole | 30mg + 500mg + 500mg | Triple Pack |  | 01030500/05010103 | | Proton Pump Inhibitors/Broad-Spectrum Penicillins |
| Contraindication for Statins |  |  | 31689 | 9739911000001100 | 89869020 | Clarosip 187.5mg granules for oral suspension straws (Grunenthal Ltd) | Clarithromycin | 187.5mg | Granules | Oral | 0 | | Unknown |
| Contraindication for Statins |  |  | 53715 | 17965511000001100 | 78523020 | Clarithromycin 500mg tablets (Almus Pharmaceuticals Ltd) | Clarithromycin | 500mg | Tablet | Oral | 0 | | Unknown |
| Contraindication for Statins |  |  | 28349 | 9739611000001100 | 89867020 | Clarosip 125mg granules for oral suspension straws (Grunenthal Ltd) | Clarithromycin | 125mg | Granules | Oral | 0 | | Unknown |
| Contraindication for Statins |  |  | 5662 | 204855001000027000 | 77604020 | Amoxicillin 500mg / Clarithromycin 500mg / Lansoprazole 30mg triple pack | Amoxicillin Trihydrate/Clarithromycin/Lansoprazole | 500mg + 500mg + 30mg | Triple Pack |  | 01030500/05010103 | | Proton Pump Inhibitors/Broad-Spectrum Penicillins |
| Contraindication for Statins |  |  | 11433 | 235495001000027000 | 86832020 | Clarithromycin 500mg with lansoprazole 30mg and amoxicillin 500mg triple pack | Amoxicillin Trihydrate/Clarithromycin/Lansoprazole | 500mg + 30mg + 500mg | Triple Pack |  | 01030500/05010103 | | Proton Pump Inhibitors/Broad-Spectrum Penicillins |
| Contraindication for Statins |  |  | 17645 | 9742511000001100 | 89865020 | Clarithromycin 250mg granules straws | Clarithromycin | 250mg | Granules | Oral | 0 | | Unknown |
| Contraindication for Statins |  |  | 26059 | 9742411000001100 | 89863020 | Clarithromycin 187.5mg granules straws | Clarithromycin | 187.5mg | Granules | Oral | 0 | | Unknown |
| Contraindication for Statins |  |  | 46603 | 19373411000001100 | 126021 | Azithromycin 15mg/g eye drops 0.25g unit dose preservative free | Azithromycin dihydrate | 15mg/1gram | Eye drops | Ocular | 11030100 | | Antibacterials (In Eye Preparation) |
| Contraindication for Statins |  |  | 46994 | 19372311000001100 | 128021 | Azyter 15mg/g eye drops 0.25g unit dose (Thea Pharmaceuticals Ltd) | Azithromycin dihydrate | 15mg/1gram | Eye drops | Ocular | 11030100 | | Antibacterials (In Eye Preparation) |
| Contraindication for Statins |  |  | 67757 | 376658002 | 10005020 | Nefazodone 50mg tablets | Nefazodone hydrochloride | 50mg | Tablet | Oral | 0 | | Unknown |
| Contraindication for Statins |  |  | 3391 | 864911000001105 | 79505020 | Dutonin 100mg tablets (Bristol-Myers Squibb Pharmaceuticals Ltd) | Nefazodone hydrochloride | 100mg | Tablet | Oral | 4030300 | | Selective Serotonin Re-Uptake Inhibitors |
| Contraindication for Statins |  |  | 4297 | 666211000001104 | 79506020 | Dutonin 200mg tablets (Bristol-Myers Squibb Pharmaceuticals Ltd) | Nefazodone hydrochloride | 200mg | Tablet | Oral | 4030300 | | Selective Serotonin Re-Uptake Inhibitors |
| Contraindication for Statins |  |  | 9534 | 210645001000027000 | 79511020 | Nefazodone Starter pack | Nefazodone Hydrochloride |  | Starter Pack | Oral | 4030400 | | Other Antidepressant Drugs |
| Contraindication for Statins |  |  | 63827 | 3936411000001100 | 10006020 | Dutonin 50mg tablets (Bristol-Myers Squibb Pharmaceuticals Ltd) | Nefazodone hydrochloride | 50mg | Tablet | Oral | 0 | | Unknown |
| Contraindication for Statins |  |  | 4011 | 321981002 | 79510020 | Nefazodone 200mg tablets | Nefazodone hydrochloride | 200mg | Tablet | Oral | 4030300 | | Selective Serotonin Re-Uptake Inhibitors |
| Contraindication for Statins |  |  | 4554 | 321980001 | 79509020 | Nefazodone 100mg tablets | Nefazodone hydrochloride | 100mg | Tablet | Oral | 4030300 | | Selective Serotonin Re-Uptake Inhibitors |
| Contraindication for Statins |  |  | 4062 | 389111000001109 | 58845020 | Lopid 600mg tablets (Pfizer Ltd) | Gemfibrozil | 600mg | Tablet | Oral | 2120300 | | Fibrates |
| Contraindication for Statins |  |  | 3318 | 319966005 | 62908020 | Gemfibrozil 300mg capsules | Gemfibrozil | 300mg | Capsule | Oral | 2120300 | | Fibrates |
| Contraindication for Statins |  |  | 2215 | 383511000001102 | 58844020 | Lopid 300mg capsules (Pfizer Ltd) | Gemfibrozil | 300mg | Capsule | Oral | 2120300 | | Fibrates |
| Contraindication for Statins |  |  | 8082 | 319964008 | 62909020 | Gemfibrozil 600mg tablets | Gemfibrozil | 600mg | Tablet | Oral | 2120300 | | Fibrates |
| Contraindication for Statins |  |  | 34277 | 646111000001100 | 56740020 | Gemfibrozil 600mg tablets (Teva UK Ltd) | Gemfibrozil | 600mg | Tablet | Oral | 2120300 | | Fibrates |
| Contraindication for Statins |  |  | 53175 | 16561911000001100 | 7439020 | Neoral 25mg capsules (Mawdsley-Brooks & Company Ltd) | Ciclosporin | 25mg | Capsule | Oral | 08020200/10010302/13050300 | | Corticosteroids And Other Immunosuppressants/Drugs Affecting The Immune Response In Rheumatic Disease/Drugs Affecting The Immune Response For Eczema And Psoriasis |
| Contraindication for Statins |  |  | 52615 | 14344711000001100 | 7444020 | Neoral 100mg capsules (Sigma Pharmaceuticals Plc) | Ciclosporin | 100mg | Capsule | Oral | 08020200/10010302/13050300 | | Corticosteroids And Other Immunosuppressants/Drugs Affecting The Immune Response In Rheumatic Disease/Drugs Affecting The Immune Response For Eczema And Psoriasis |
| Contraindication for Statins |  |  | 47102 | 17665611000001100 | 99162020 | Capimune 50mg capsules (Mylan) | Ciclosporin | 50mg | Capsule | Oral | 08020200/10010302/13050300 | | Corticosteroids And Other Immunosuppressants/Drugs Affecting The Immune Response In Rheumatic Disease/Drugs Affecting The Immune Response For Eczema And Psoriasis |
| Contraindication for Statins |  |  | 47042 | 203115001000027000 | 77102020 | Ciclosporin 100mg Capsule (Hillcross Pharmaceuticals Ltd) | Ciclosporin | 100mg | Capsule | Oral | 01050300/08020200 | | Drugs Affecting The Immune Response (In Chronic Bowel Disorders)/Corticosteroids And Other Immunosuppressants |
| Contraindication for Statins |  |  | 49958 | 19617911000001100 | 7441020 | Neoral 25mg capsules (DE Pharmaceuticals) | Ciclosporin | 25mg | Capsule | Oral | 08020200/10010302/13050300 | | Corticosteroids And Other Immunosuppressants/Drugs Affecting The Immune Response In Rheumatic Disease/Drugs Affecting The Immune Response For Eczema And Psoriasis |
[truncated: 21,994 more chars]
